# Supplementary material for: High-resolution mapping of the neutralizing and binding specificities of polyclonal sera post-HIV Env trimer vaccination
Source: eLife journal article supplement (doi:10.7554/elife.64281), 2021-01-13
Supplement: supp [file elife-64281-supp-v1.zip]

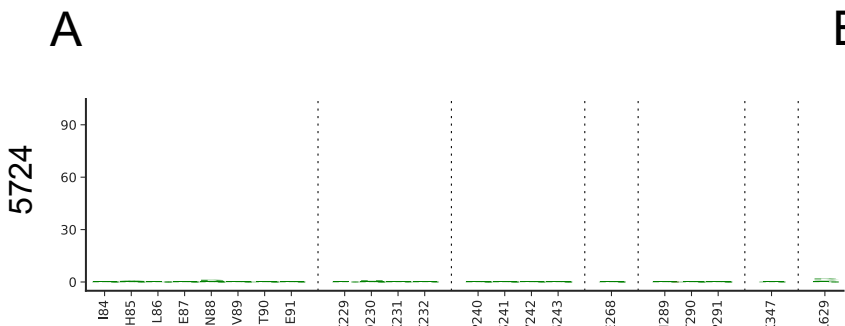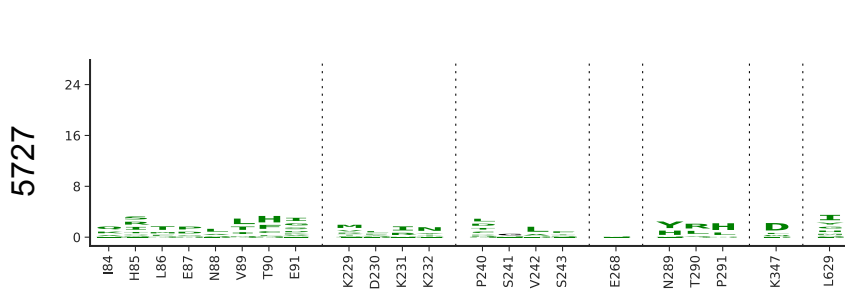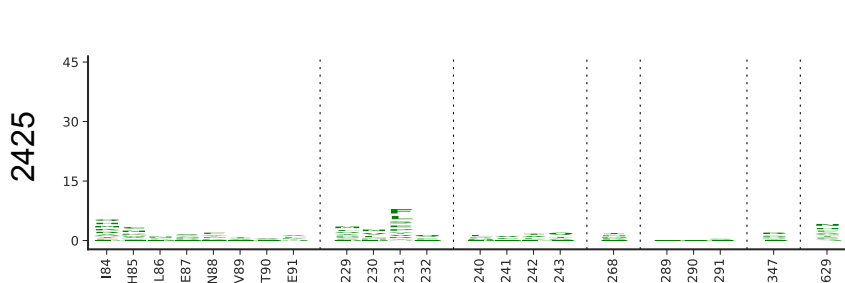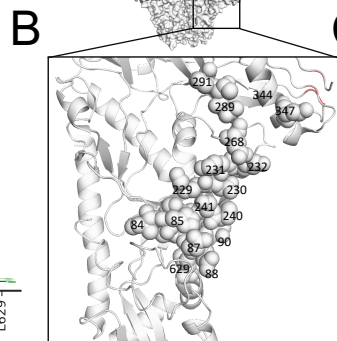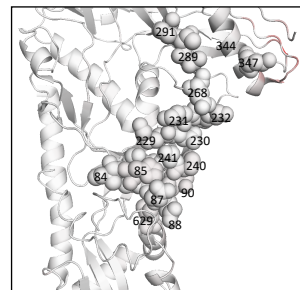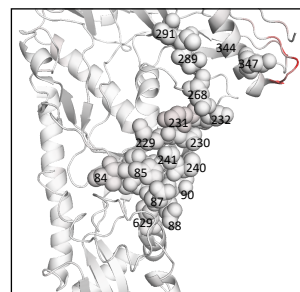

**C**

|       | TZM-bl<br>ID <sub>50</sub> WT /<br>Mutant<br>(SD) | TZM-bl<br>MNP<br>(SD) | MAP Fold<br>Enrichment |
|-------|---------------------------------------------------|-----------------------|------------------------|
| I84E  | 1 (0.1)                                           | 104 (12)              | 0.7                    |
| S241G | 1.5 (0.8)                                         | 99 (1)                | 0.4                    |
| E268P | 0.8 (0.3)                                         | 98 (1)                | 0.5                    |
| N289D | 1.7 (0.3)                                         | 99 (*)                | 0.7                    |
| N289R | 1.5 (0.8)                                         | 99 (1)                | 0.9                    |
| L629P | 1.3 (1.2)                                         | 109 (9)               | 0.4                    |

|       |           |          |     |
|-------|-----------|----------|-----|
| I84E  | 3.1 (2.6) | 104 (5)  | 0.8 |
| S241G | 1.6 (0.7) | 108 (9)  | 1.5 |
| E268P | 1.5 (0.3) | 99 (3)   | 0.7 |
| N289D | 2.4 (0.7) | 98 (2)   | 0.4 |
| N289R | 1.9 (1.1) | 100 (2)  | 0.9 |
| L629P | 3.2 (1)   | 118 (13) | 1.0 |

|       |           |         |     |
|-------|-----------|---------|-----|
| I84E  | 0.9 (0.2) | 101 (7) | 1.3 |
| S241G | 1.3 (0.4) | 98 (4)  | 0.6 |
| E268P | 0.7 (0.3) | 98 (2)  | 0.5 |
| N289D | 1.3 (0.4) | 100 (1) | 0.6 |
| N289R | 1.2 (0.9) | 98 (2)  | 0.7 |
| L629P | 1 (0.3)   | 98 (2)  | 0.8 |
