# Supplementary material for: High-resolution mapping of the neutralizing and binding specificities of polyclonal sera post-HIV Env trimer vaccination
Source: eLife journal article supplement (doi:10.7554/elife.64281), 2021-01-13
Supplement: supp [file elife-64281-supp-v1.zip]

5724\_post-vacc, 1v2a, 0.016% infectivity, 1:20 serum dilution

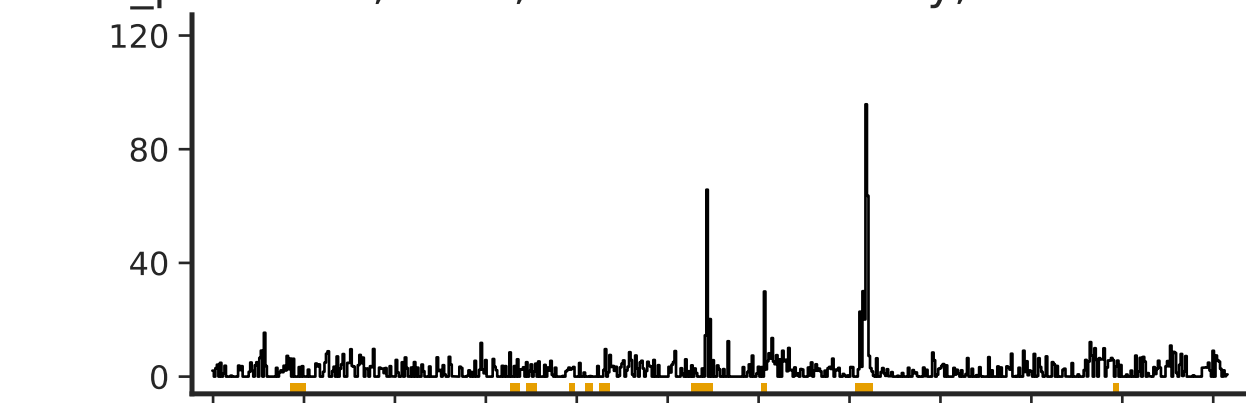

5724\_post-vacc, 1v2a, 0.016% infectivity, 1:20 serum dilution

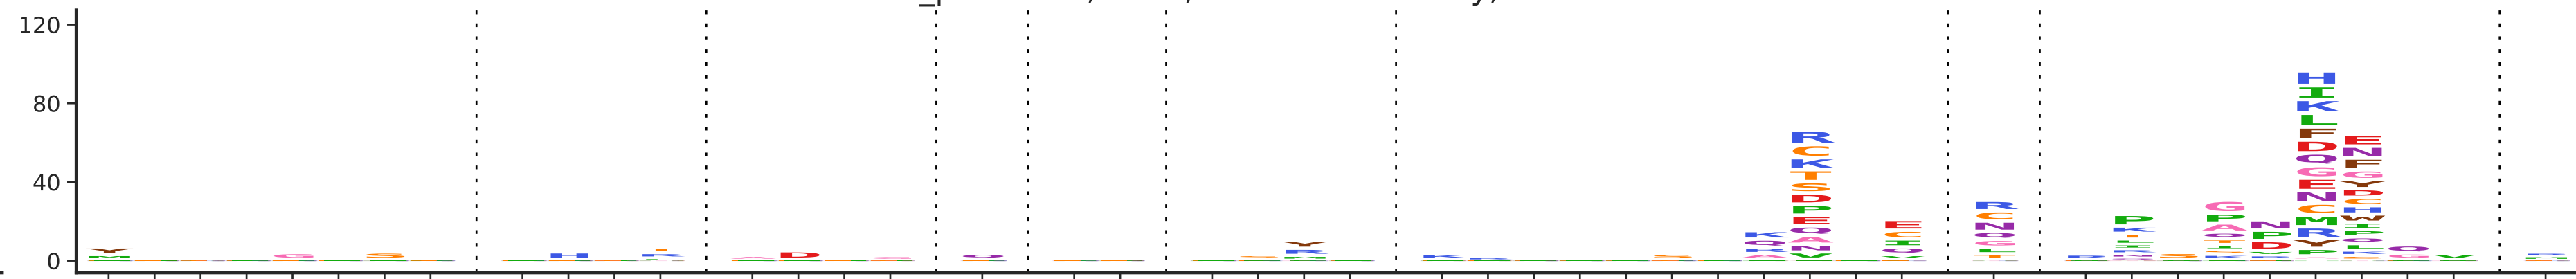

5724\_post-vacc, 2e, 0.022% infectivity, 1:10 serum dilution

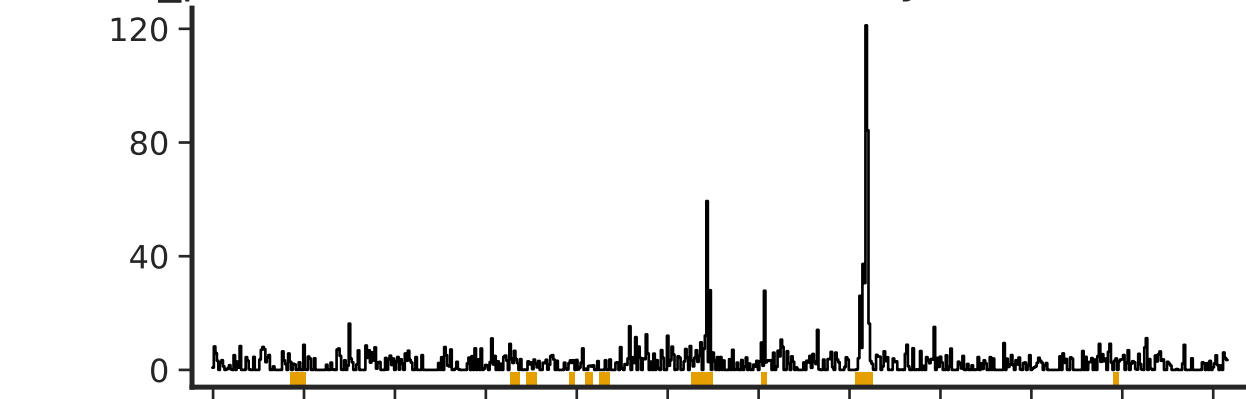

5724\_post-vacc, 2e, 0.022% infectivity, 1:10 serum dilution

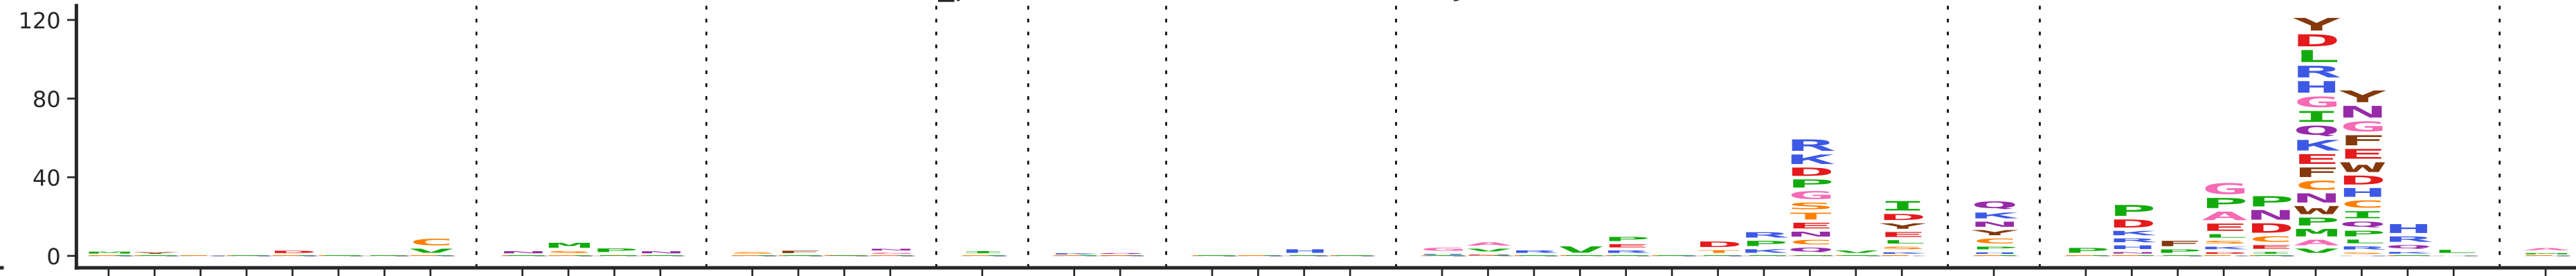

5724\_post-vacc, 2e, 0.19% infectivity, 1:30 serum dilution

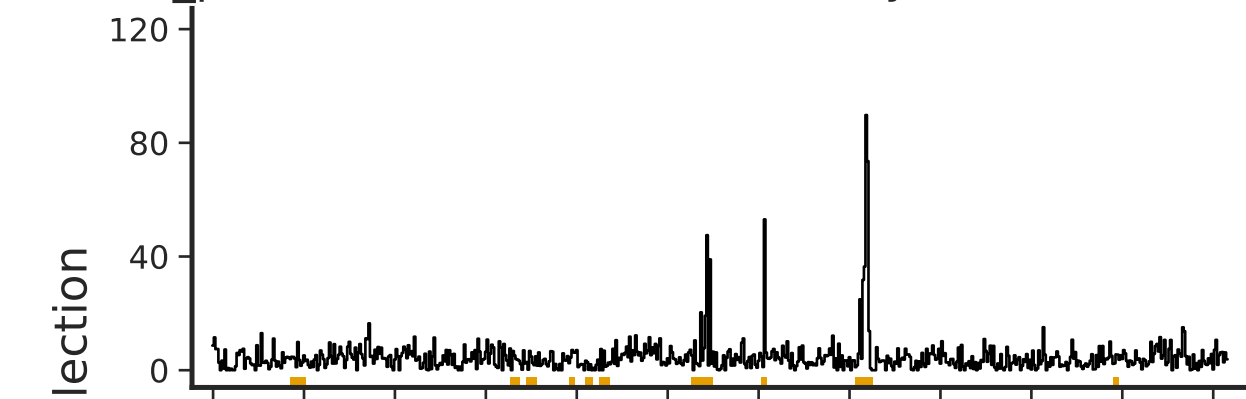

5724\_post-vacc, 2e, 0.19% infectivity, 1:30 serum dilution

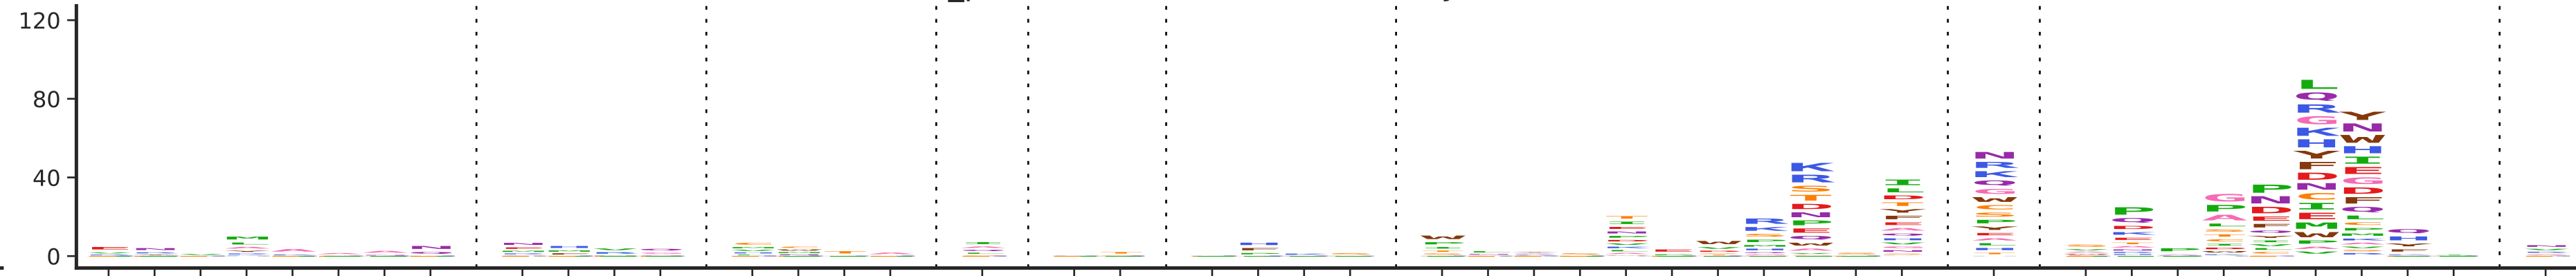

5724\_post-vacc, 2e, 1.3% infectivity, 1:80 serum dilution

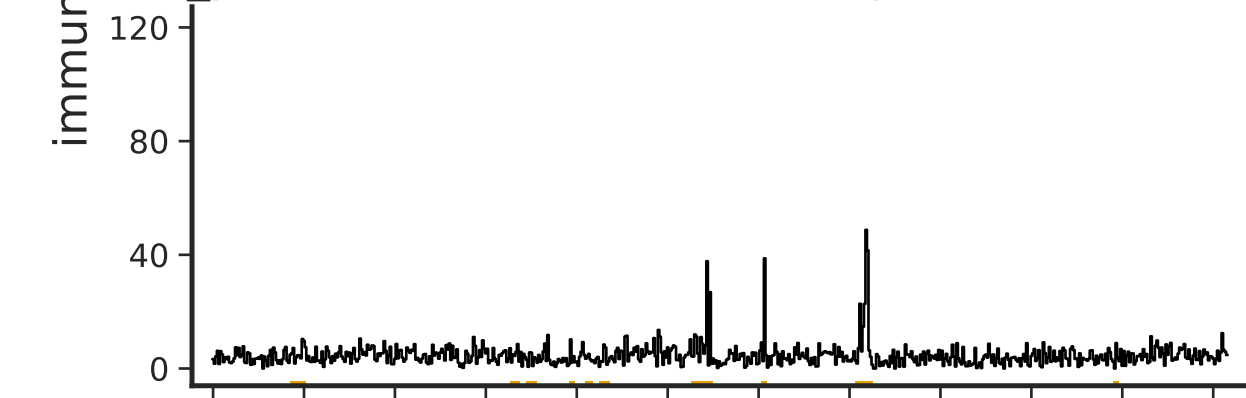

5724\_post-vacc, 2e, 1.3% infectivity, 1:80 serum dilution

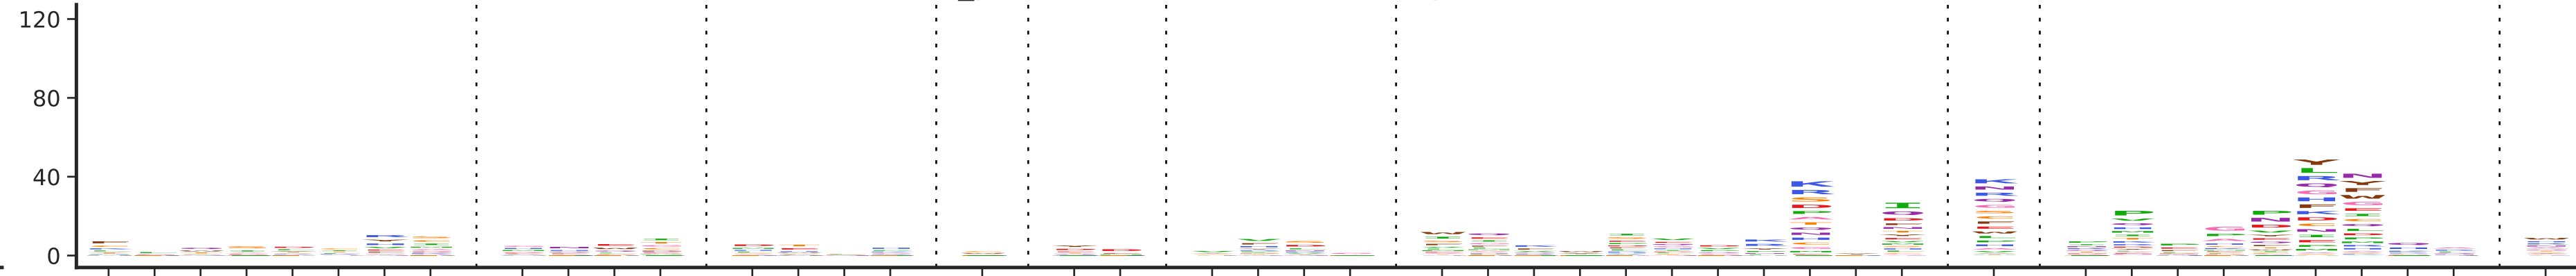

5724\_post-vacc, 3e, 0.096% infectivity, 1:30 serum dilution

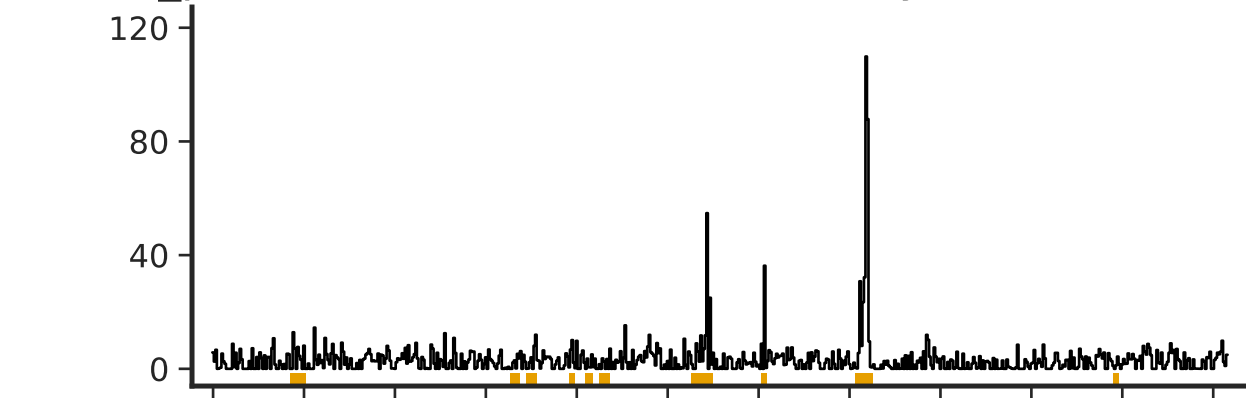

5724\_post-vacc, 3e, 0.096% infectivity, 1:30 serum dilution

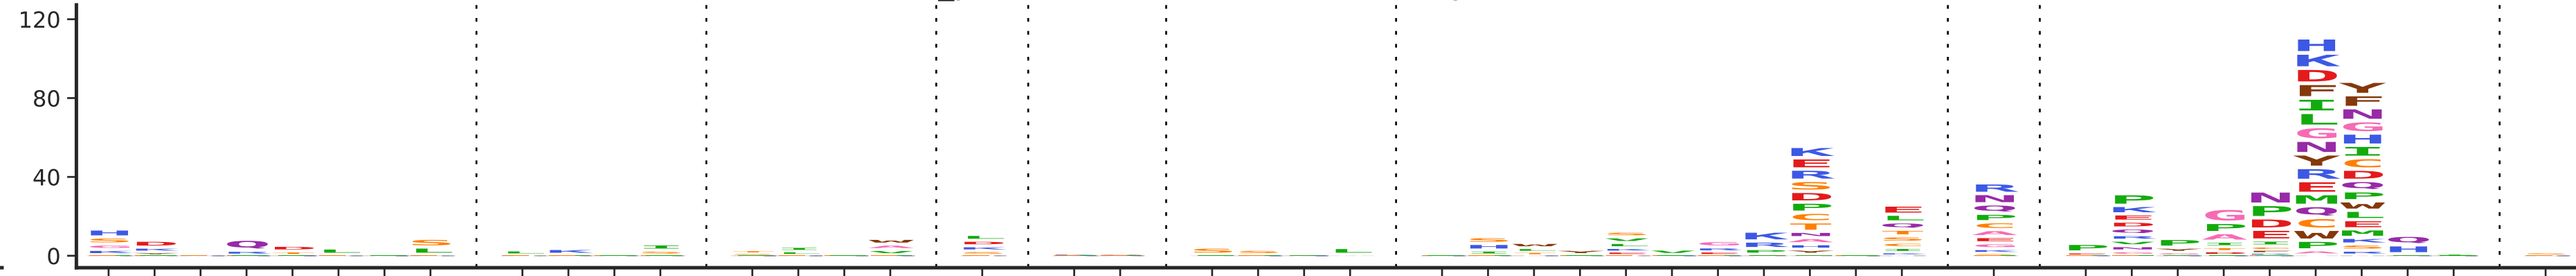

5724\_pre-vacc, 2e, 19% infectivity, 1:30 serum dilution

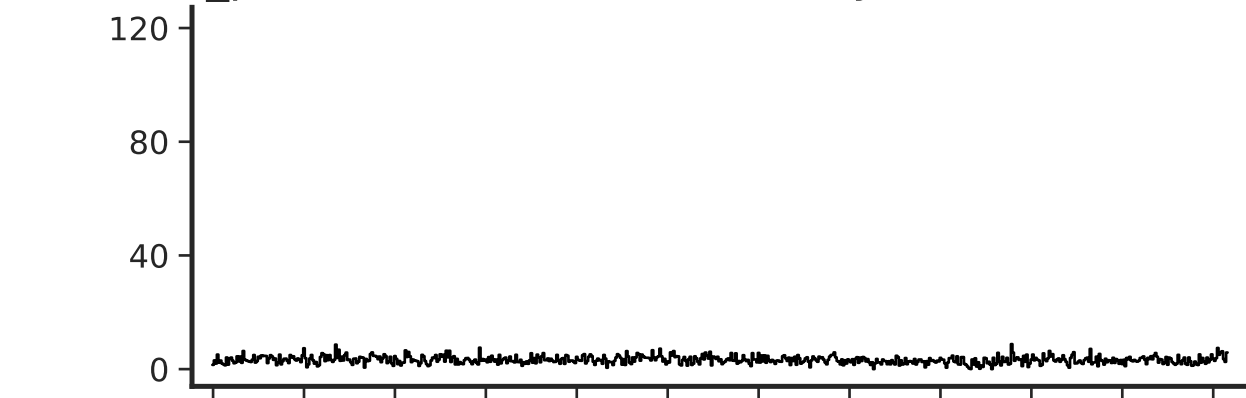

5724\_pre-vacc, 2e, 19% infectivity, 1:30 serum dilution

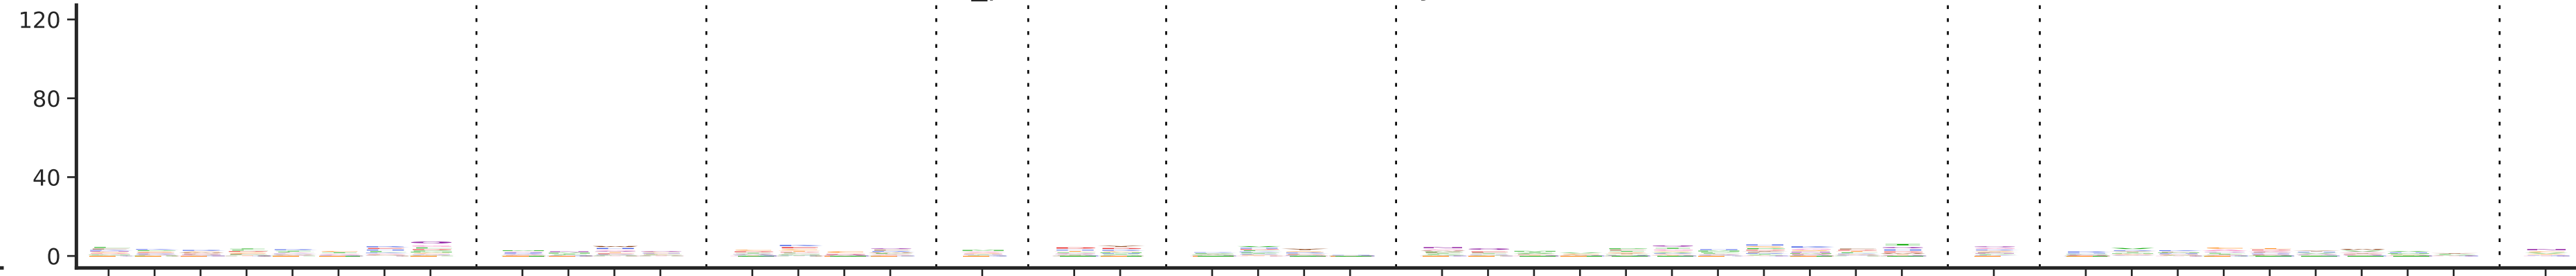

site
