# Supplementary material for: High-resolution mapping of the neutralizing and binding specificities of polyclonal sera post-HIV Env trimer vaccination
Source: eLife journal article supplement (doi:10.7554/elife.64281), 2021-01-13
Supplement: supp [file elife-64281-supp-v1.zip]

|      |                       | S241N        | P291T        | S241N + P291T* | I358T* | T465N* | I358T + T465N  | S241N + I358T  | 133aN + 136a* | 133aN + 136aA + S241N + P291T |
|------|-----------------------|--------------|--------------|----------------|--------|--------|----------------|----------------|---------------|-------------------------------|
| 5724 | ID50 WT / Mutant (SD) | 1.7<br>(0.8) | 1<br>(0.5)   | 2.7            | 27.2   | >410   | 74.1<br>(5.6)  | 35.7<br>(14.3) | 1.6           | 100.6<br>(67.6)               |
|      | MNP (SD)              | 100<br>(1)   | 103<br>(7)   | 99             | 70     | 38     | 74<br>(13)     | 96 (6)         | 100           | 52 (9)                        |
| 5727 | ID50 WT / Mutant (SD) | 1.7<br>(0.4) | 1.6<br>(0.4) | 3.4            | 2.3    | 8.2    | 3.9<br>(0.8)   | 26.7<br>(15.1) | 0.8           | 16<br>(1.6)                   |
|      | MNP (SD)              | 101<br>(2)   | 103<br>(8)   | 99             | 85     | 78     | 102<br>(8)     | 72<br>(19)     | 95            | 92 (2)                        |
| 2124 | ID50 WT / Mutant (SD) | 3.7<br>(1.4) | 2.5<br>(0.4) | 2.8            | 0.8    | 0.9    | 2.6<br>(1.1)   | 20.6<br>(7.7)  | 1.0           | 30.8<br>(2.5)                 |
|      | MNP (SD)              | 100<br>(2)   | 100<br>(0)   | 92             | 89     | 80     | 100<br>(0)     | 103<br>(2)     | 94            | 110<br>(*)                    |
| 2214 | ID50 WT / Mutant (SD) | 6.9<br>(3.3) | 5.7<br>(1.5) | 5.3            | 3.5    | 6.6    | 1.1<br>(0.2)   | 10.2<br>(7.9)  | 1.7           | 69.8<br>(92.2)                |
|      | MNP (SD)              | 27<br>(48)   | 56<br>(11)   | 97             | 93     | 87     | 96<br>(10)     | 29<br>(33)     | 97            | 30<br>(18)                    |
| 2423 | ID50 WT / Mutant (SD) | 3.4<br>(2.2) | 4.8<br>(3.9) | 14.1           | 2.8    | 6.8    | 5.5<br>(4)     | 57.1<br>(56.3) | 0.9           | 49.1<br>(58)                  |
|      | MNP (SD)              | 91 (3)       | 106<br>(30)  | 75             | 90     | 88     | 101<br>(8)     | 92<br>(12)     | 98            | 86 (2)                        |
| 2425 | ID50 WT / Mutant (SD) | 1.4<br>(0.8) | 1.1<br>(0.4) | 1.2            | 12.6   | >500   | 35.3<br>(33.3) | 15.1<br>(12.6) | 0.6           | 50.1<br>(55.7)                |
|      | MNP (SD)              | 99 (2)       | 100<br>(3)   | 99             | 65     | 44     | 87 (7)         | 92 (7)         | 97            | 97 (7)                        |

| WT/Mut ID <sub>50</sub> | MNP   |
|-------------------------|-------|
| <2.5                    | 95+   |
| 2.5-4.9                 | 85-94 |
| 5.0-10                  | 81-84 |
| >10                     | <80   |
