# Supplementary material for: High-resolution mapping of the neutralizing and binding specificities of polyclonal sera post-HIV Env trimer vaccination
Source: eLife journal article supplement (doi:10.7554/elife.64281), 2021-01-13
Supplement: supp [file elife-64281-supp-v1.zip]

2423\_post-vacc, 1v2a, 0.31% infectivity, 1:4 serum dilution

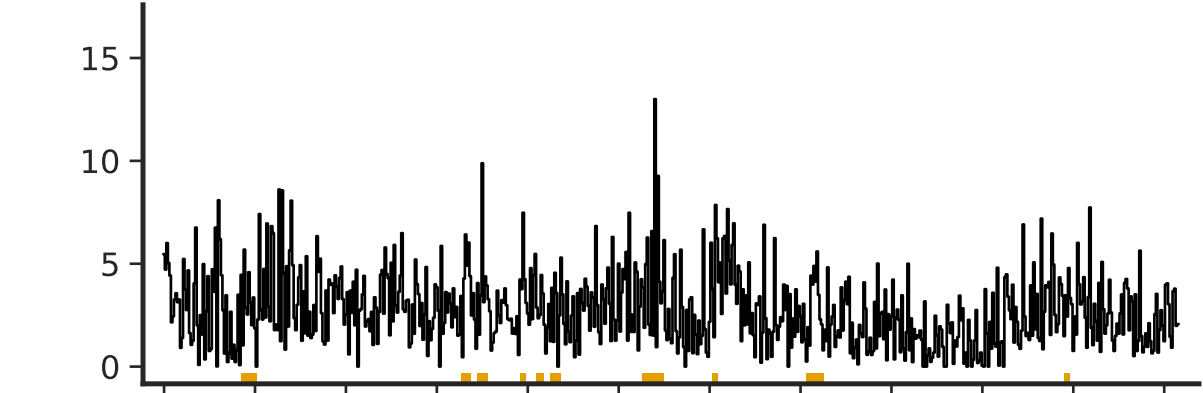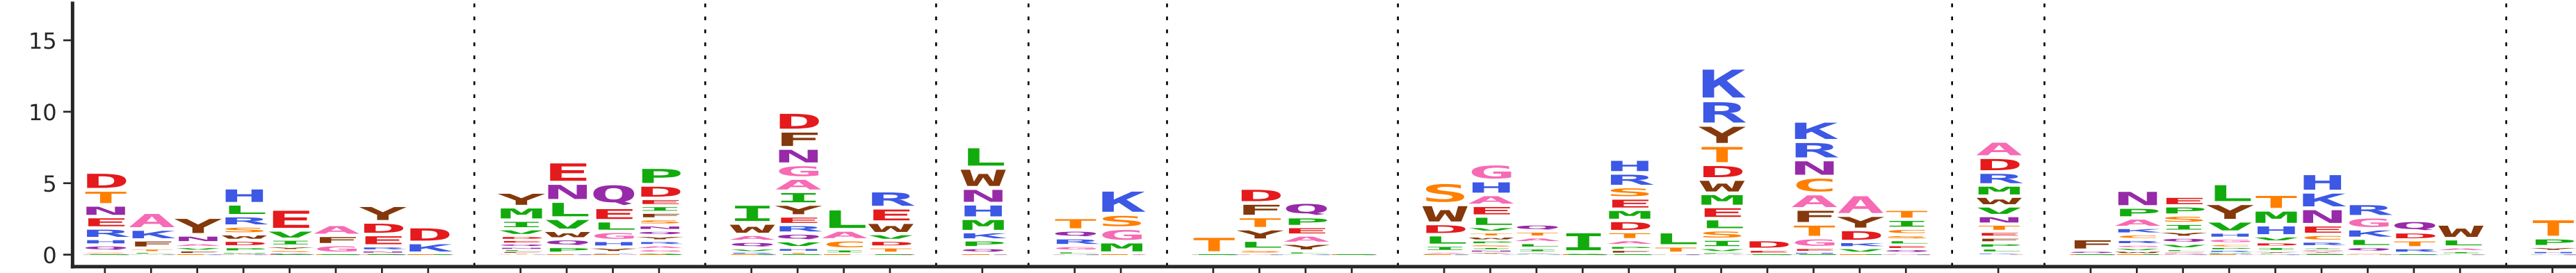

2423\_post-vacc, 1v2a, 0.32% infectivity, 1:2 serum dilution

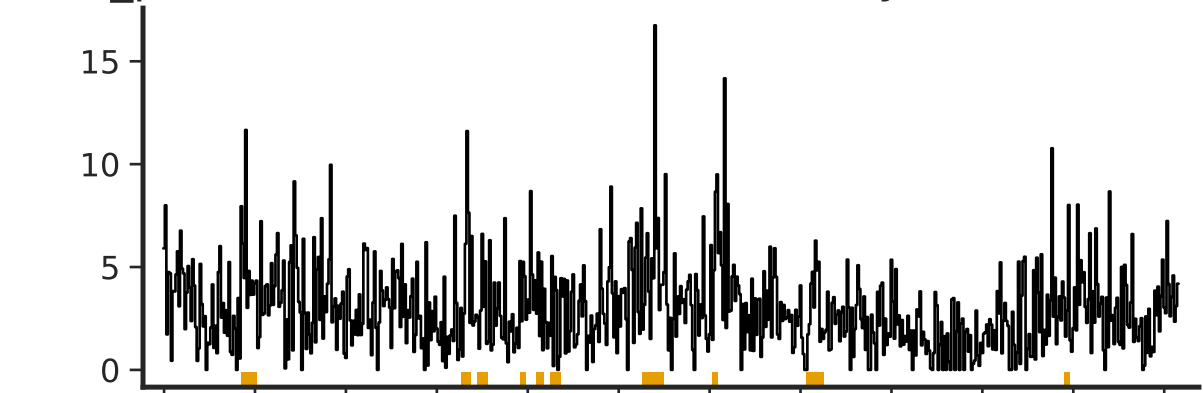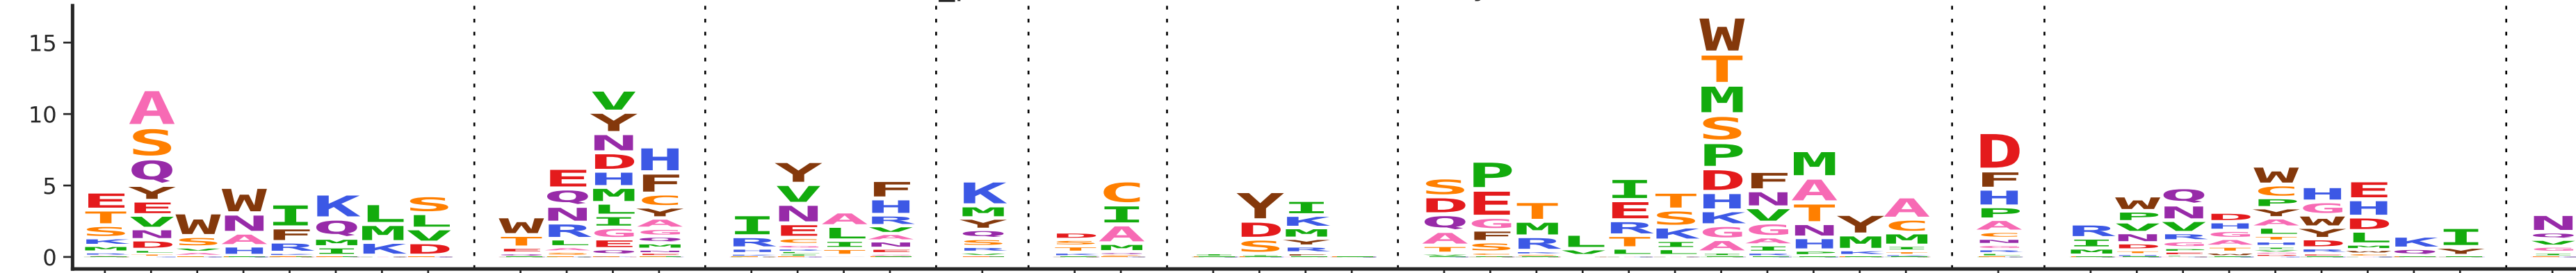

2423\_post-vacc, 2e, 2.9% infectivity, 1:10 serum dilution

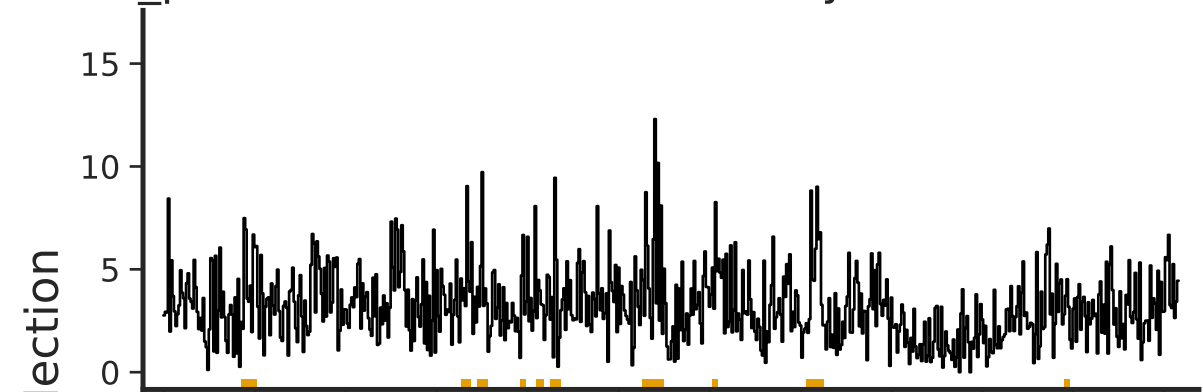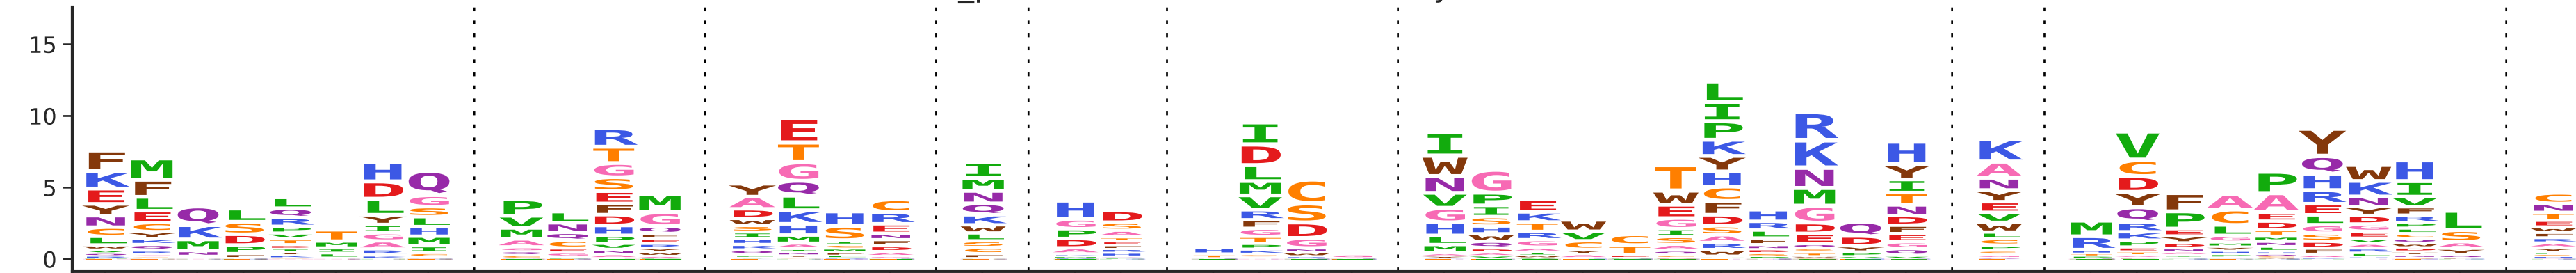

2423\_post-vacc, 2e, 8.0% infectivity, 1:30 serum dilution

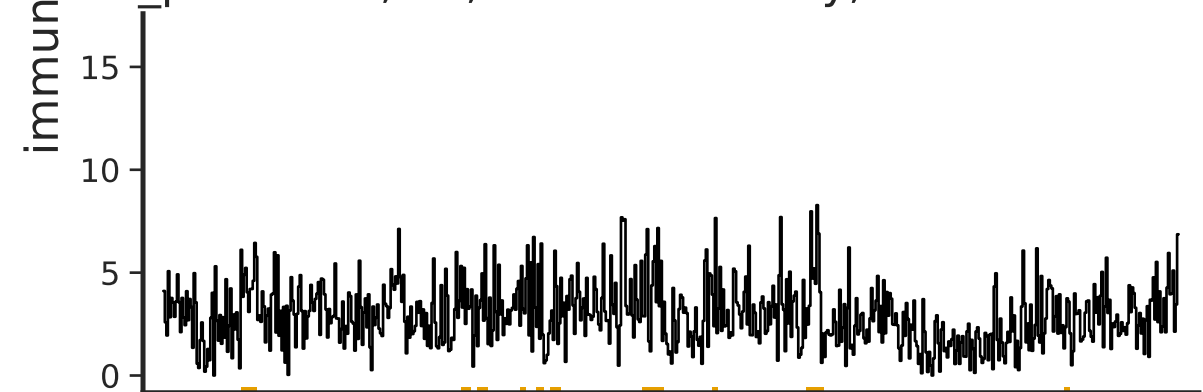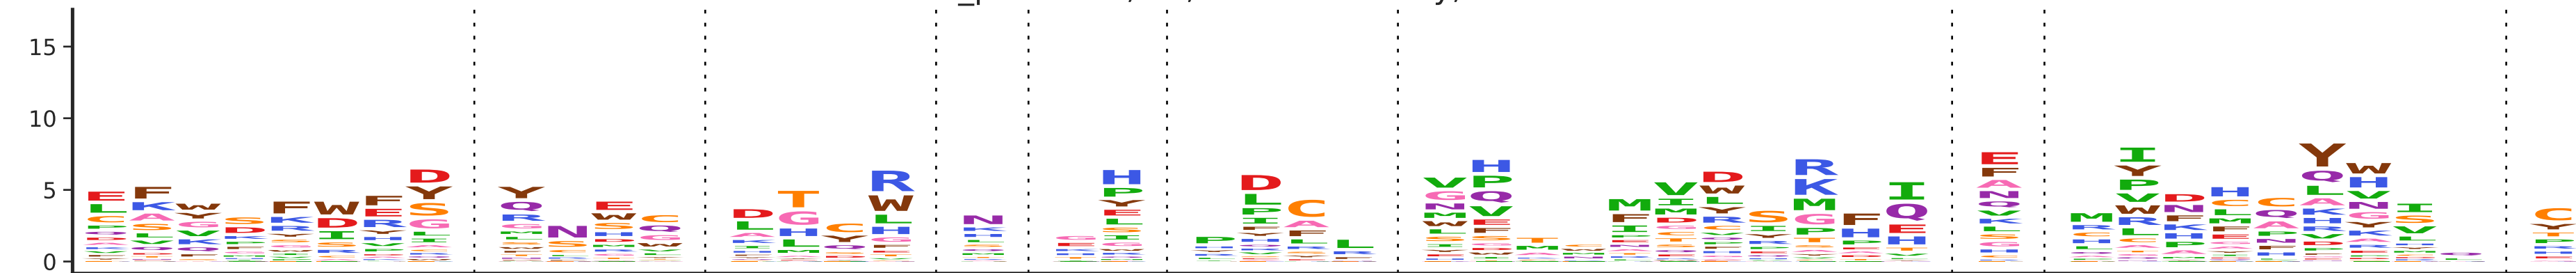

2423\_post-vacc, 3e, 1.9% infectivity, 1:5 serum dilution

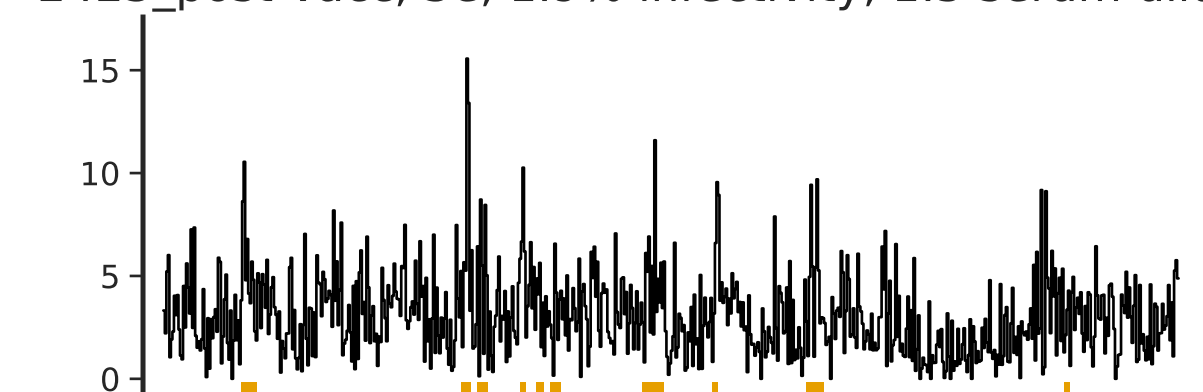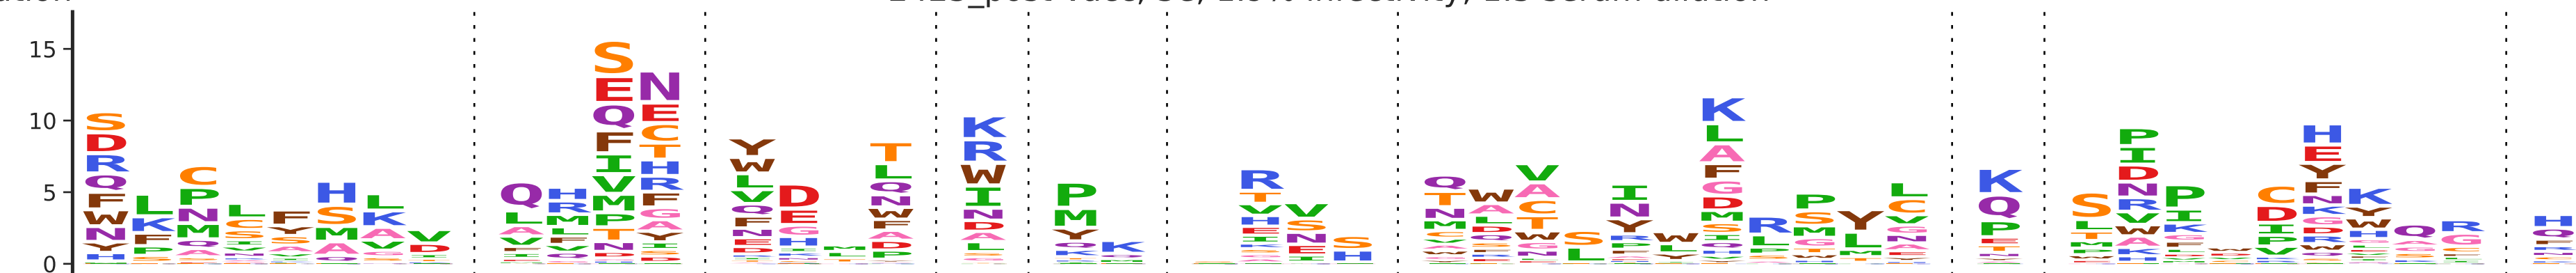

2423\_pre-vacc, 2e, 10% infectivity, 1:10 serum dilution

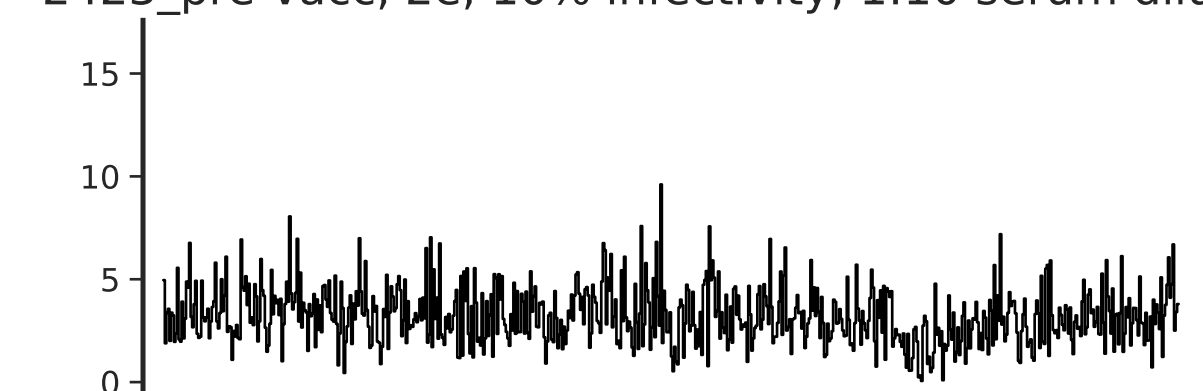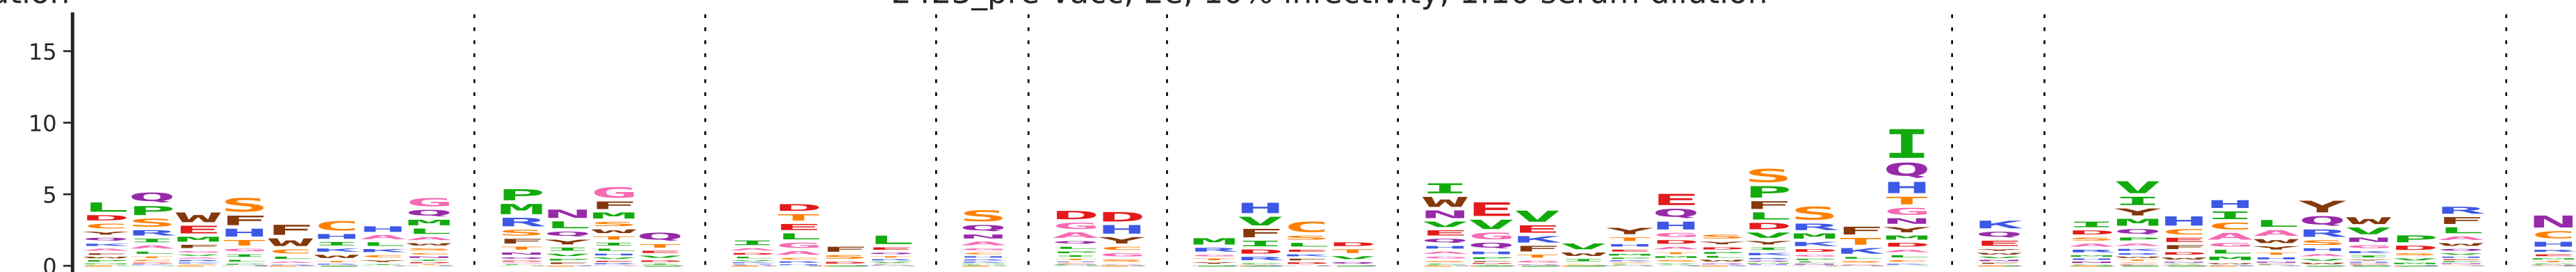

immunoselection

site
