# Supplementary figures and images for: High-resolution mapping of the neutralizing and binding specificities of polyclonal sera post-HIV Env trimer vaccination
Source: eLife journal article supplement (doi:10.7554/elife.64281), 2021-01-13

| differential selection = 2

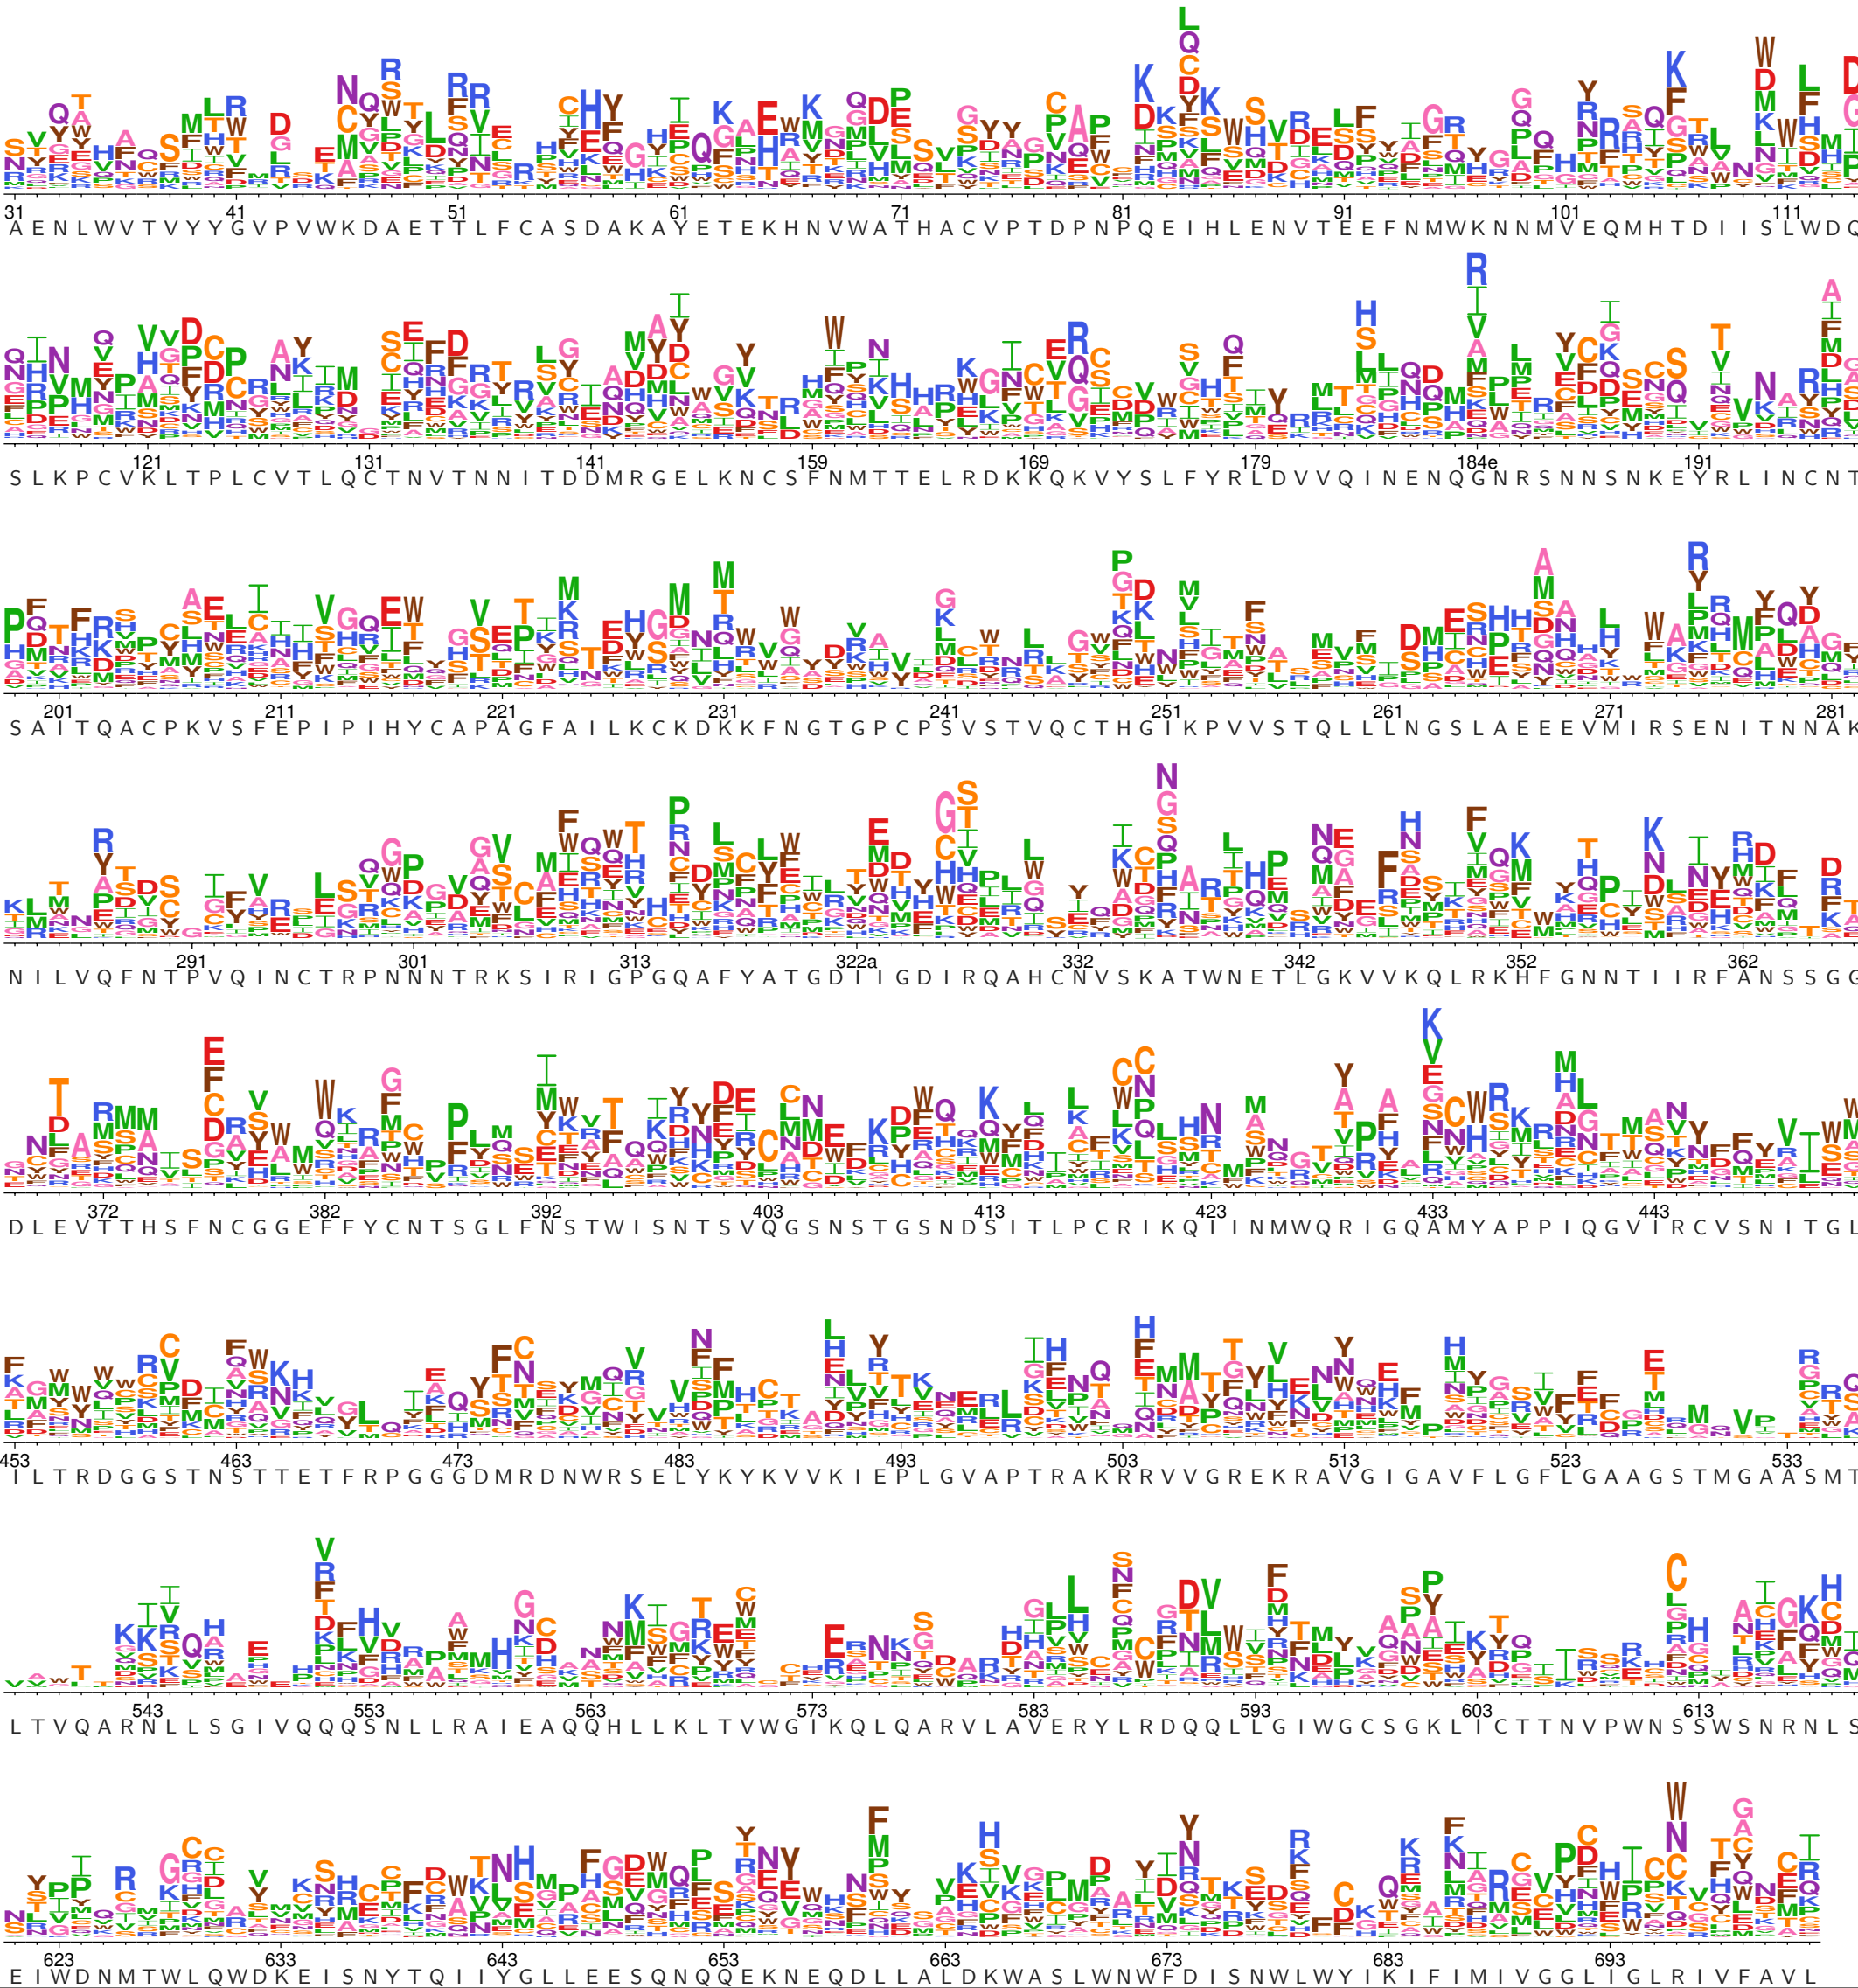

Supplement: supp [file elife-64281-supp-v1.zip]

ldifferential selection = 1

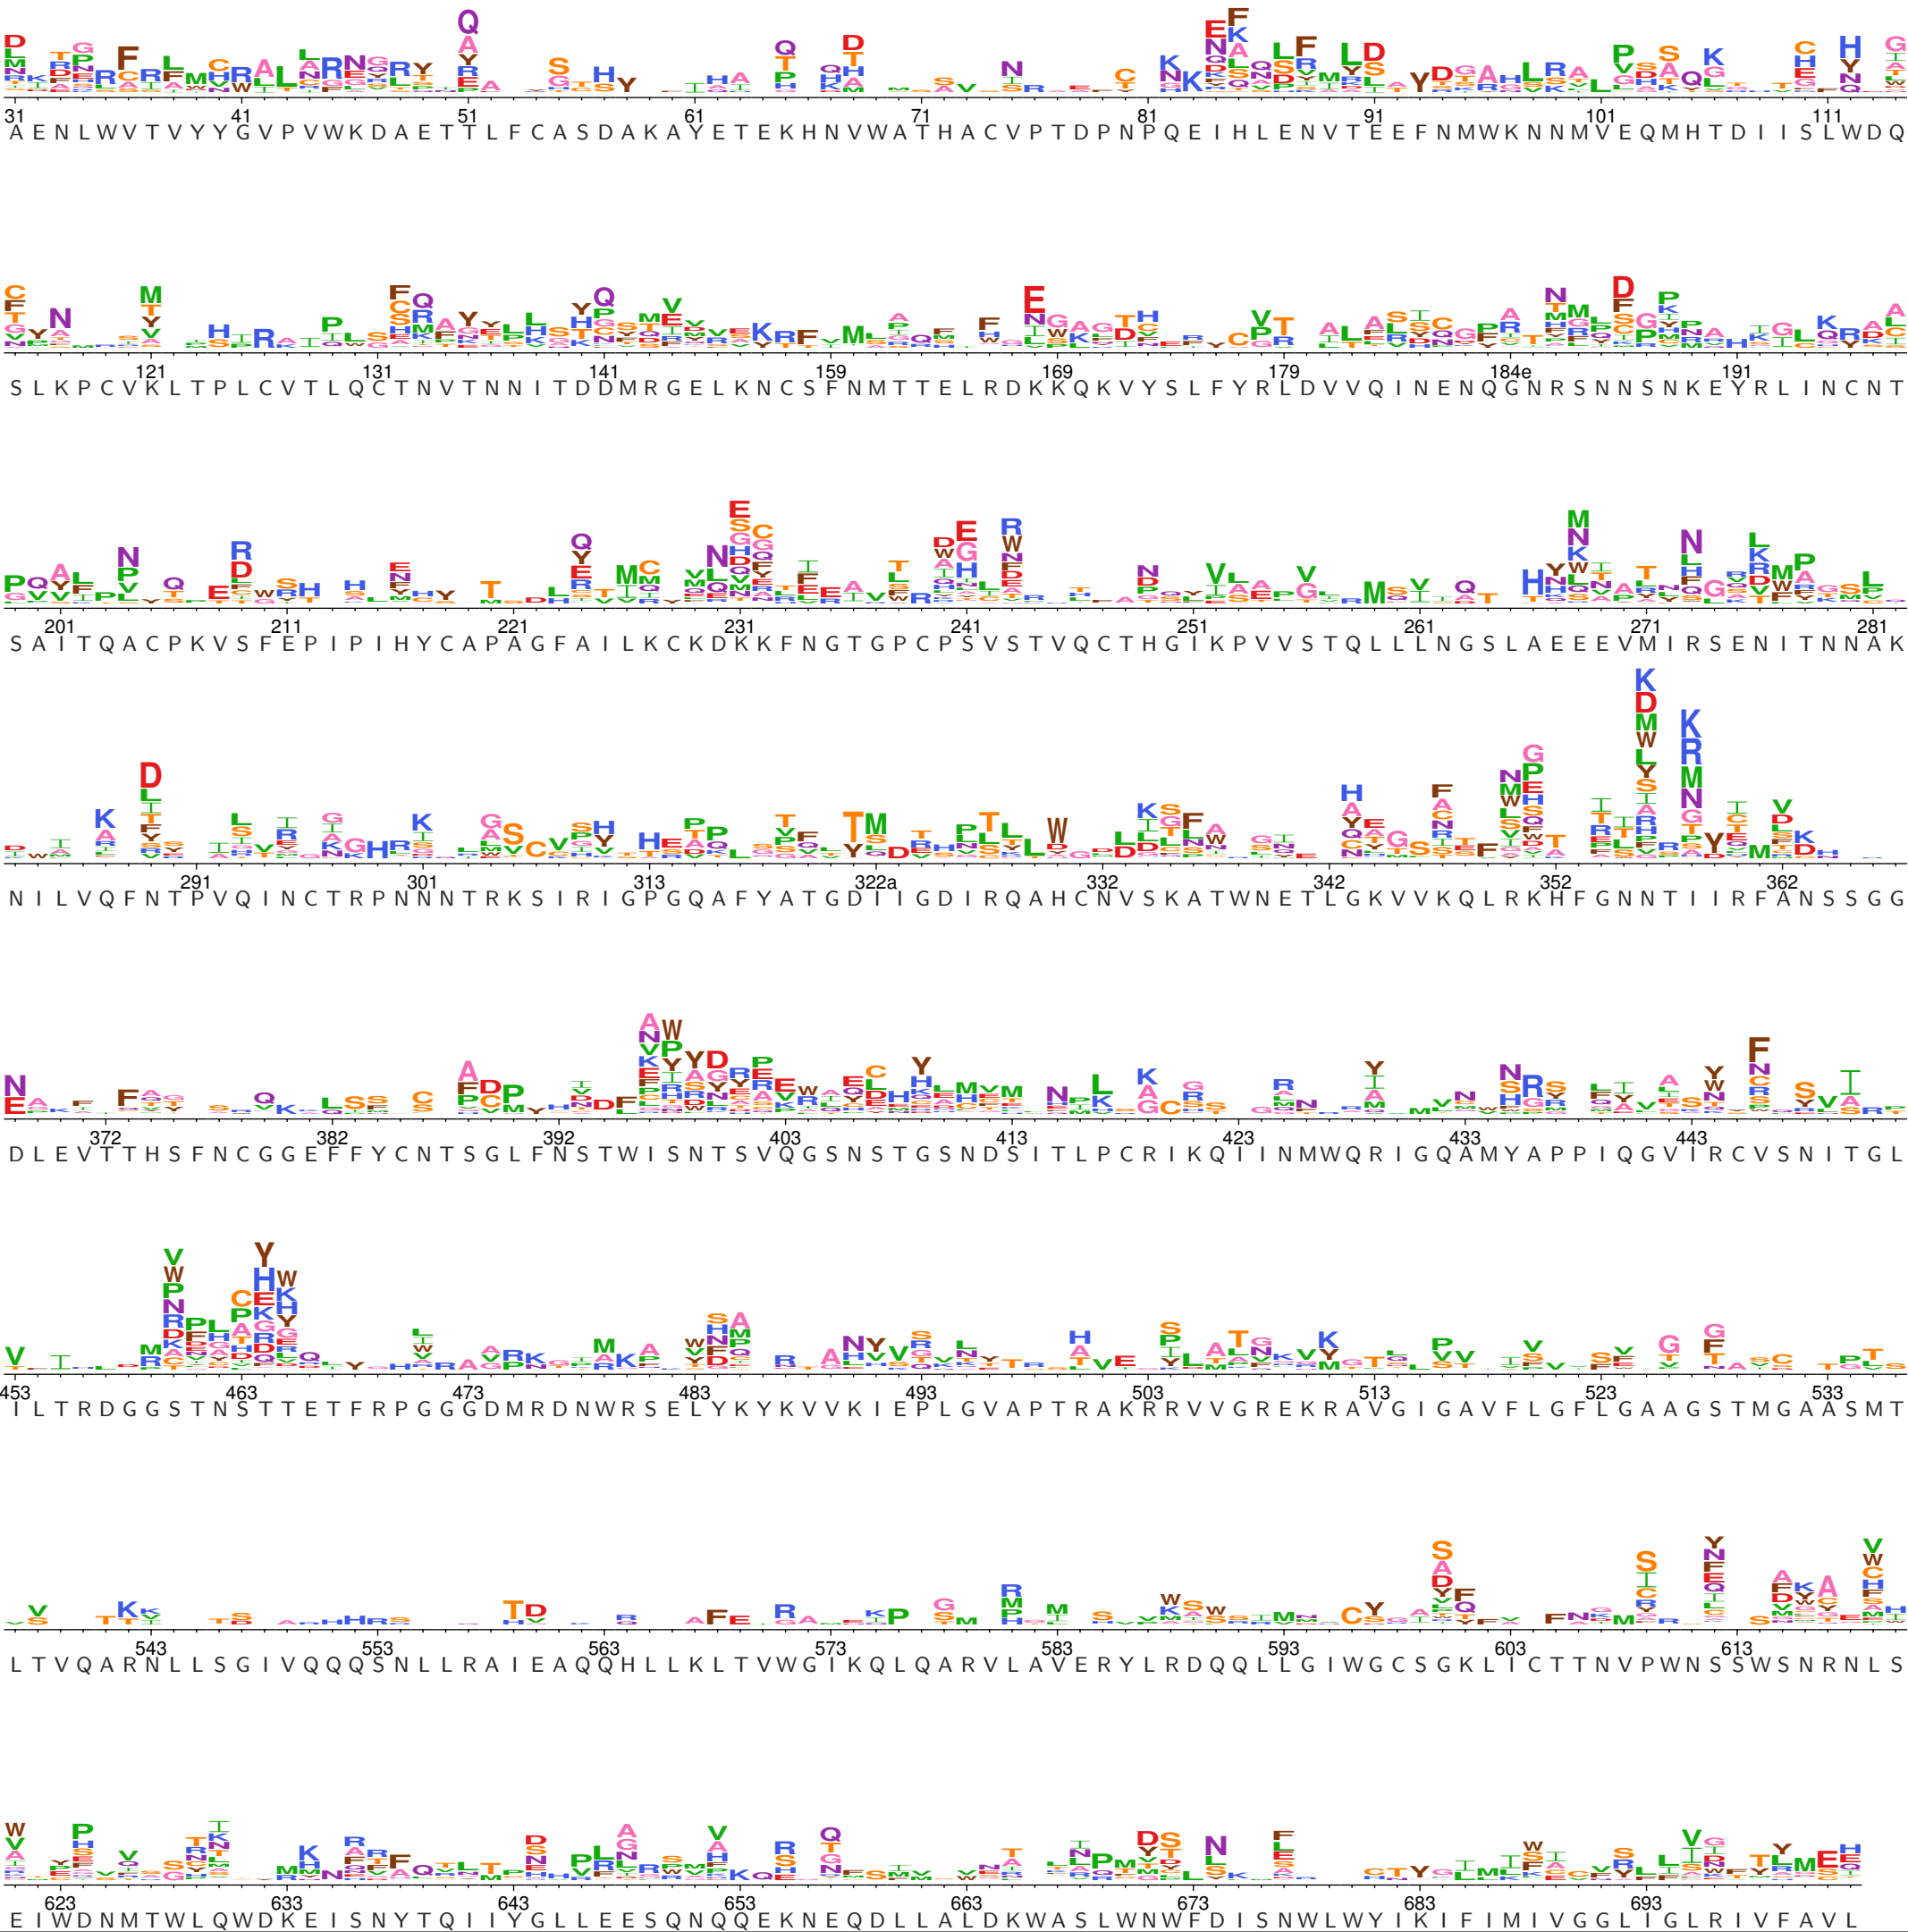

Supplement: supp [file elife-64281-supp-v1.zip]

|differential selection = 1

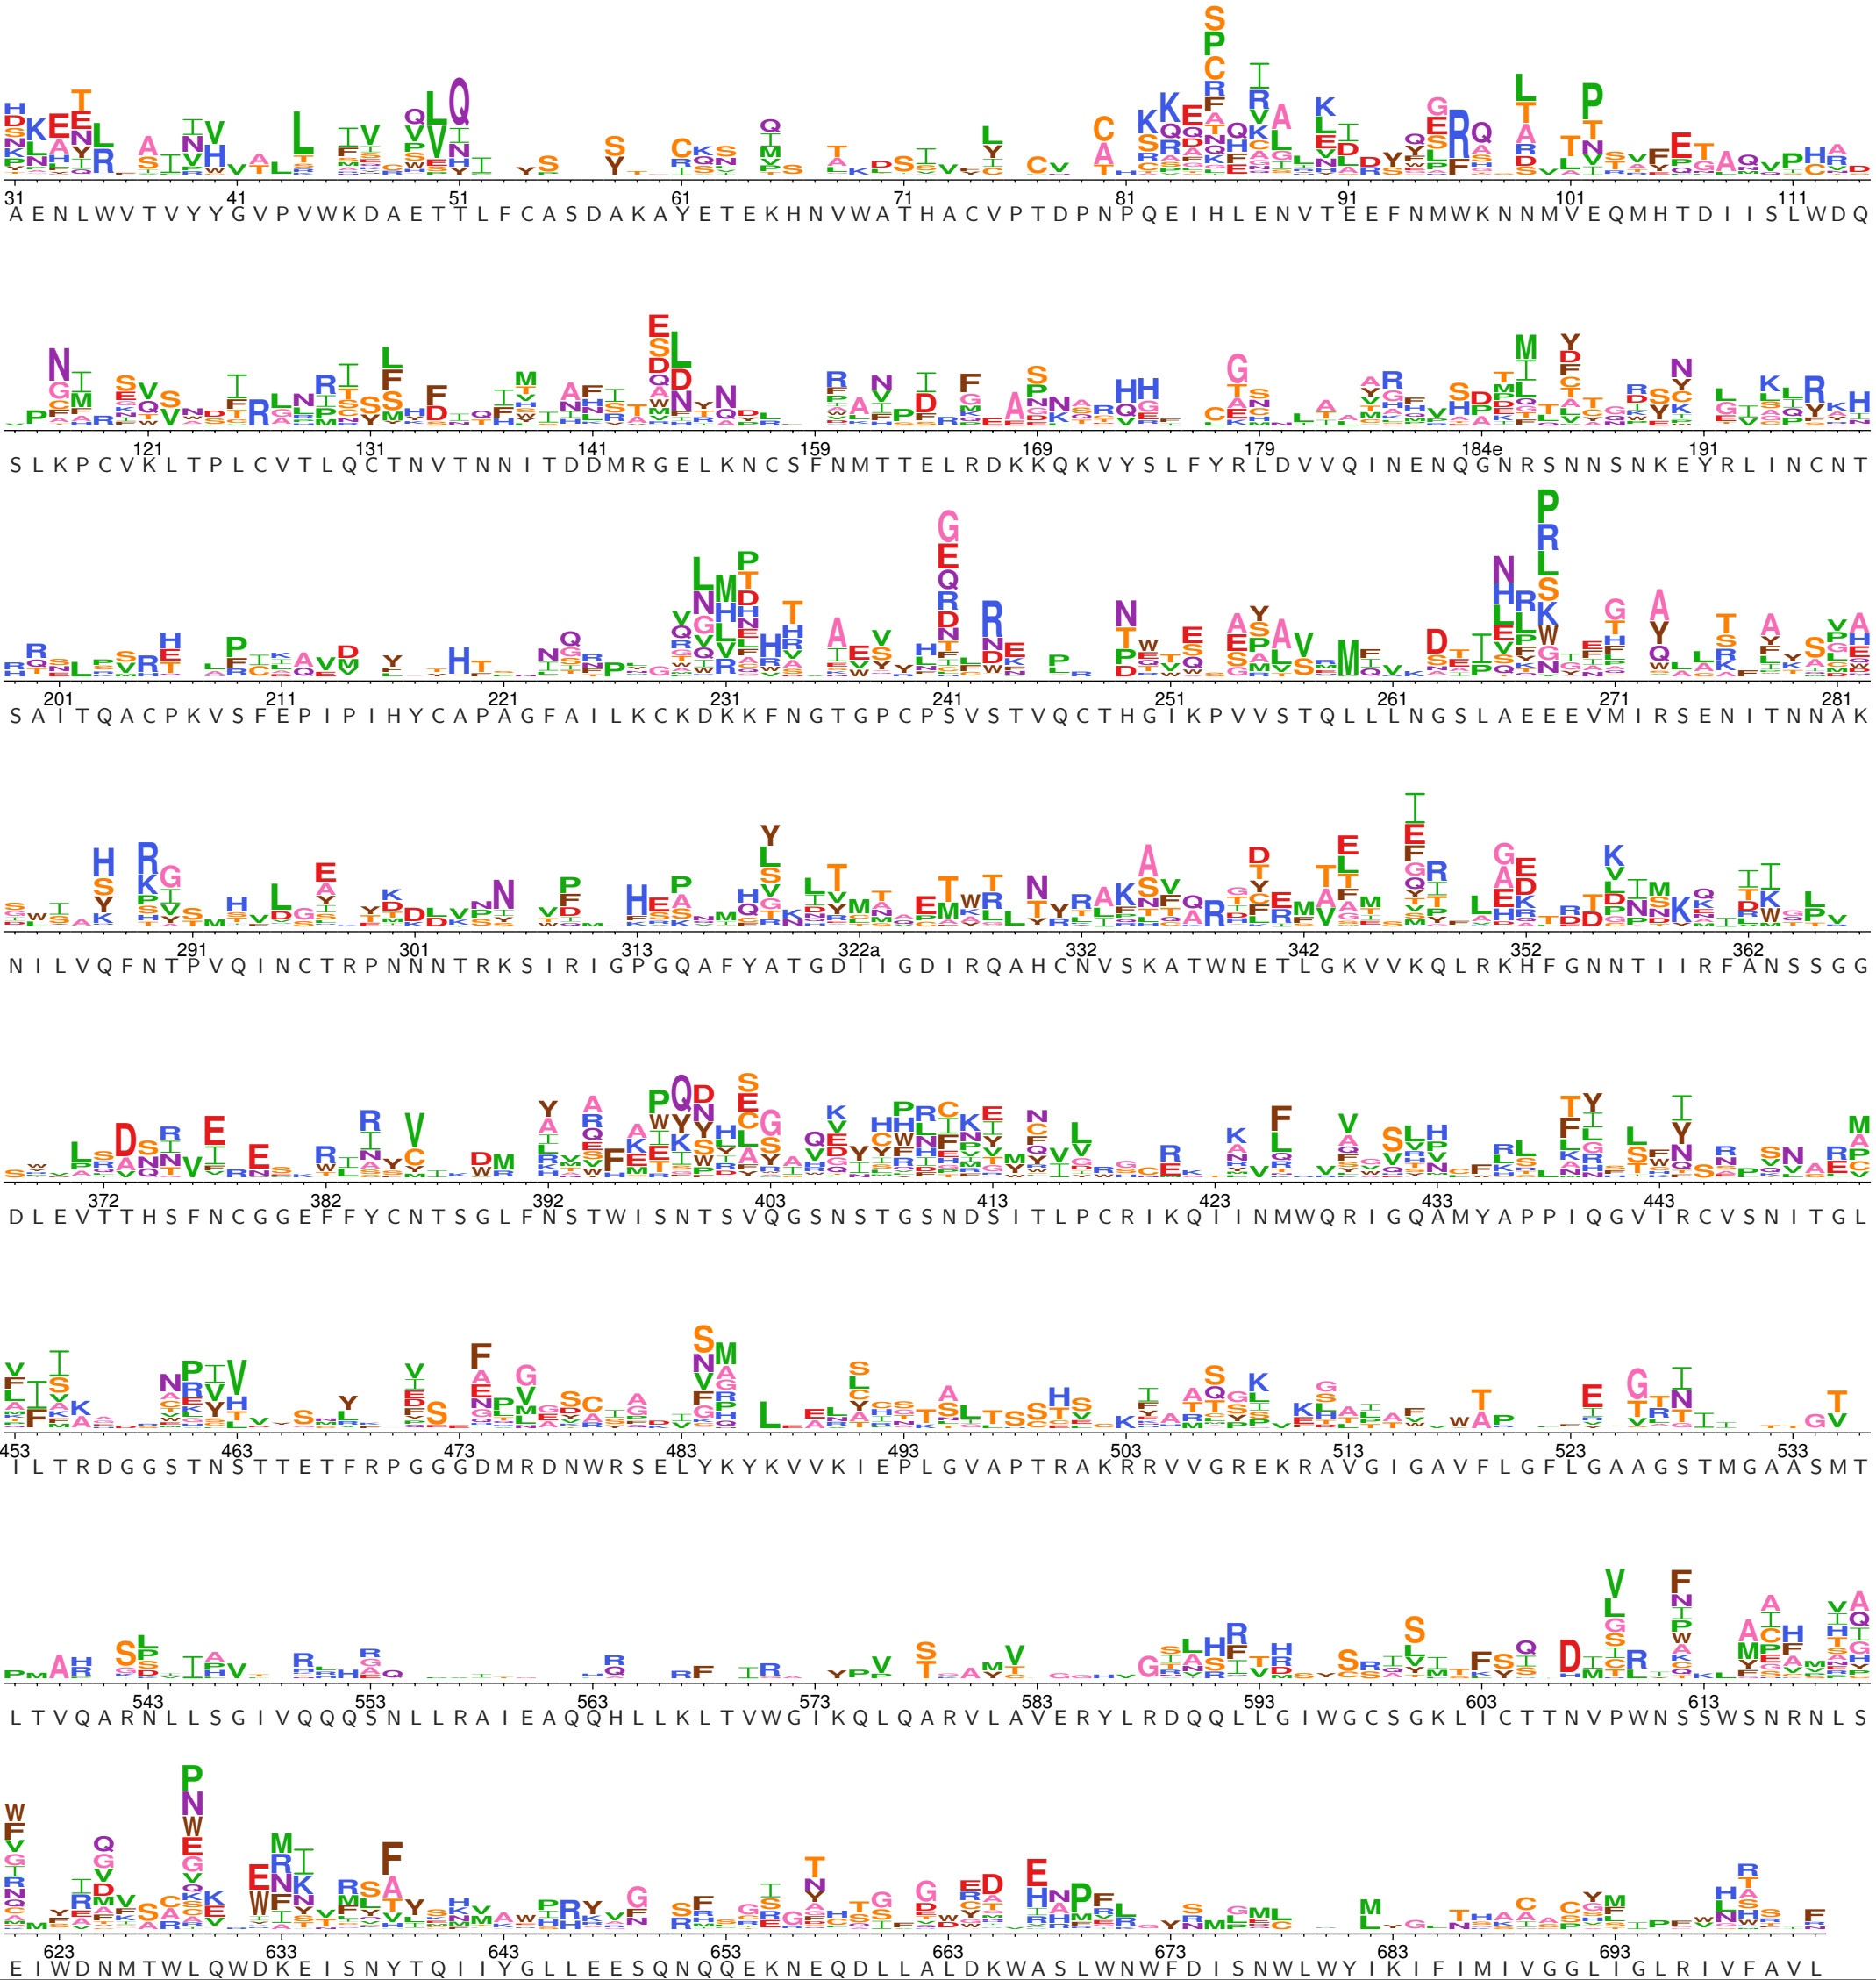

Supplement: supp [file elife-64281-supp-v1.zip]

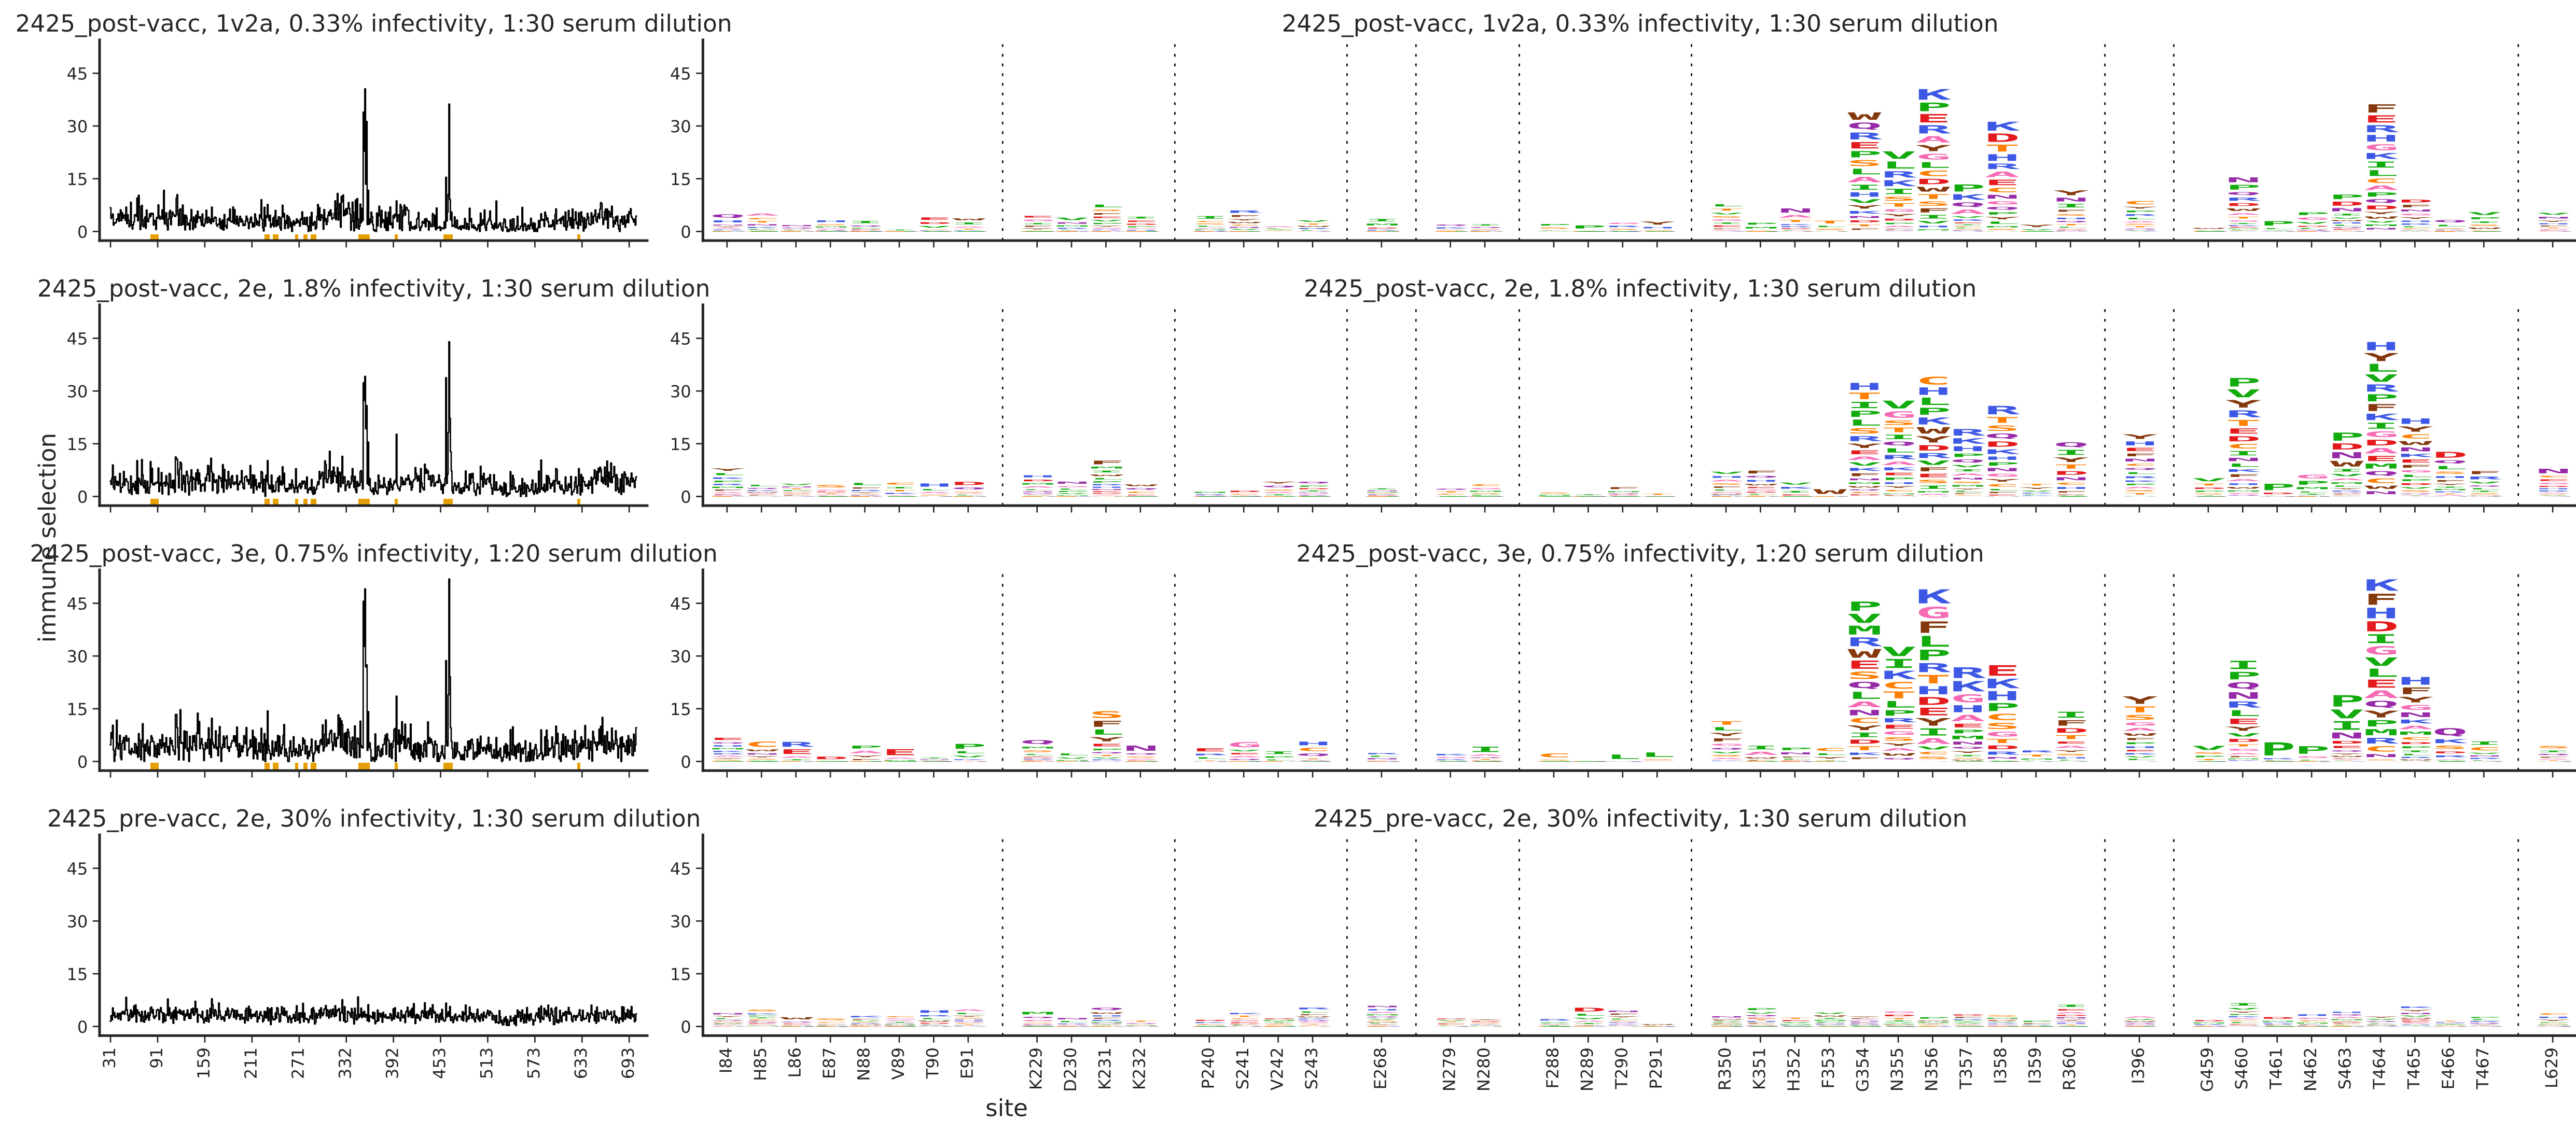

Supplement: supp [file elife-64281-supp-v1.zip]

ldifferential selection = 4

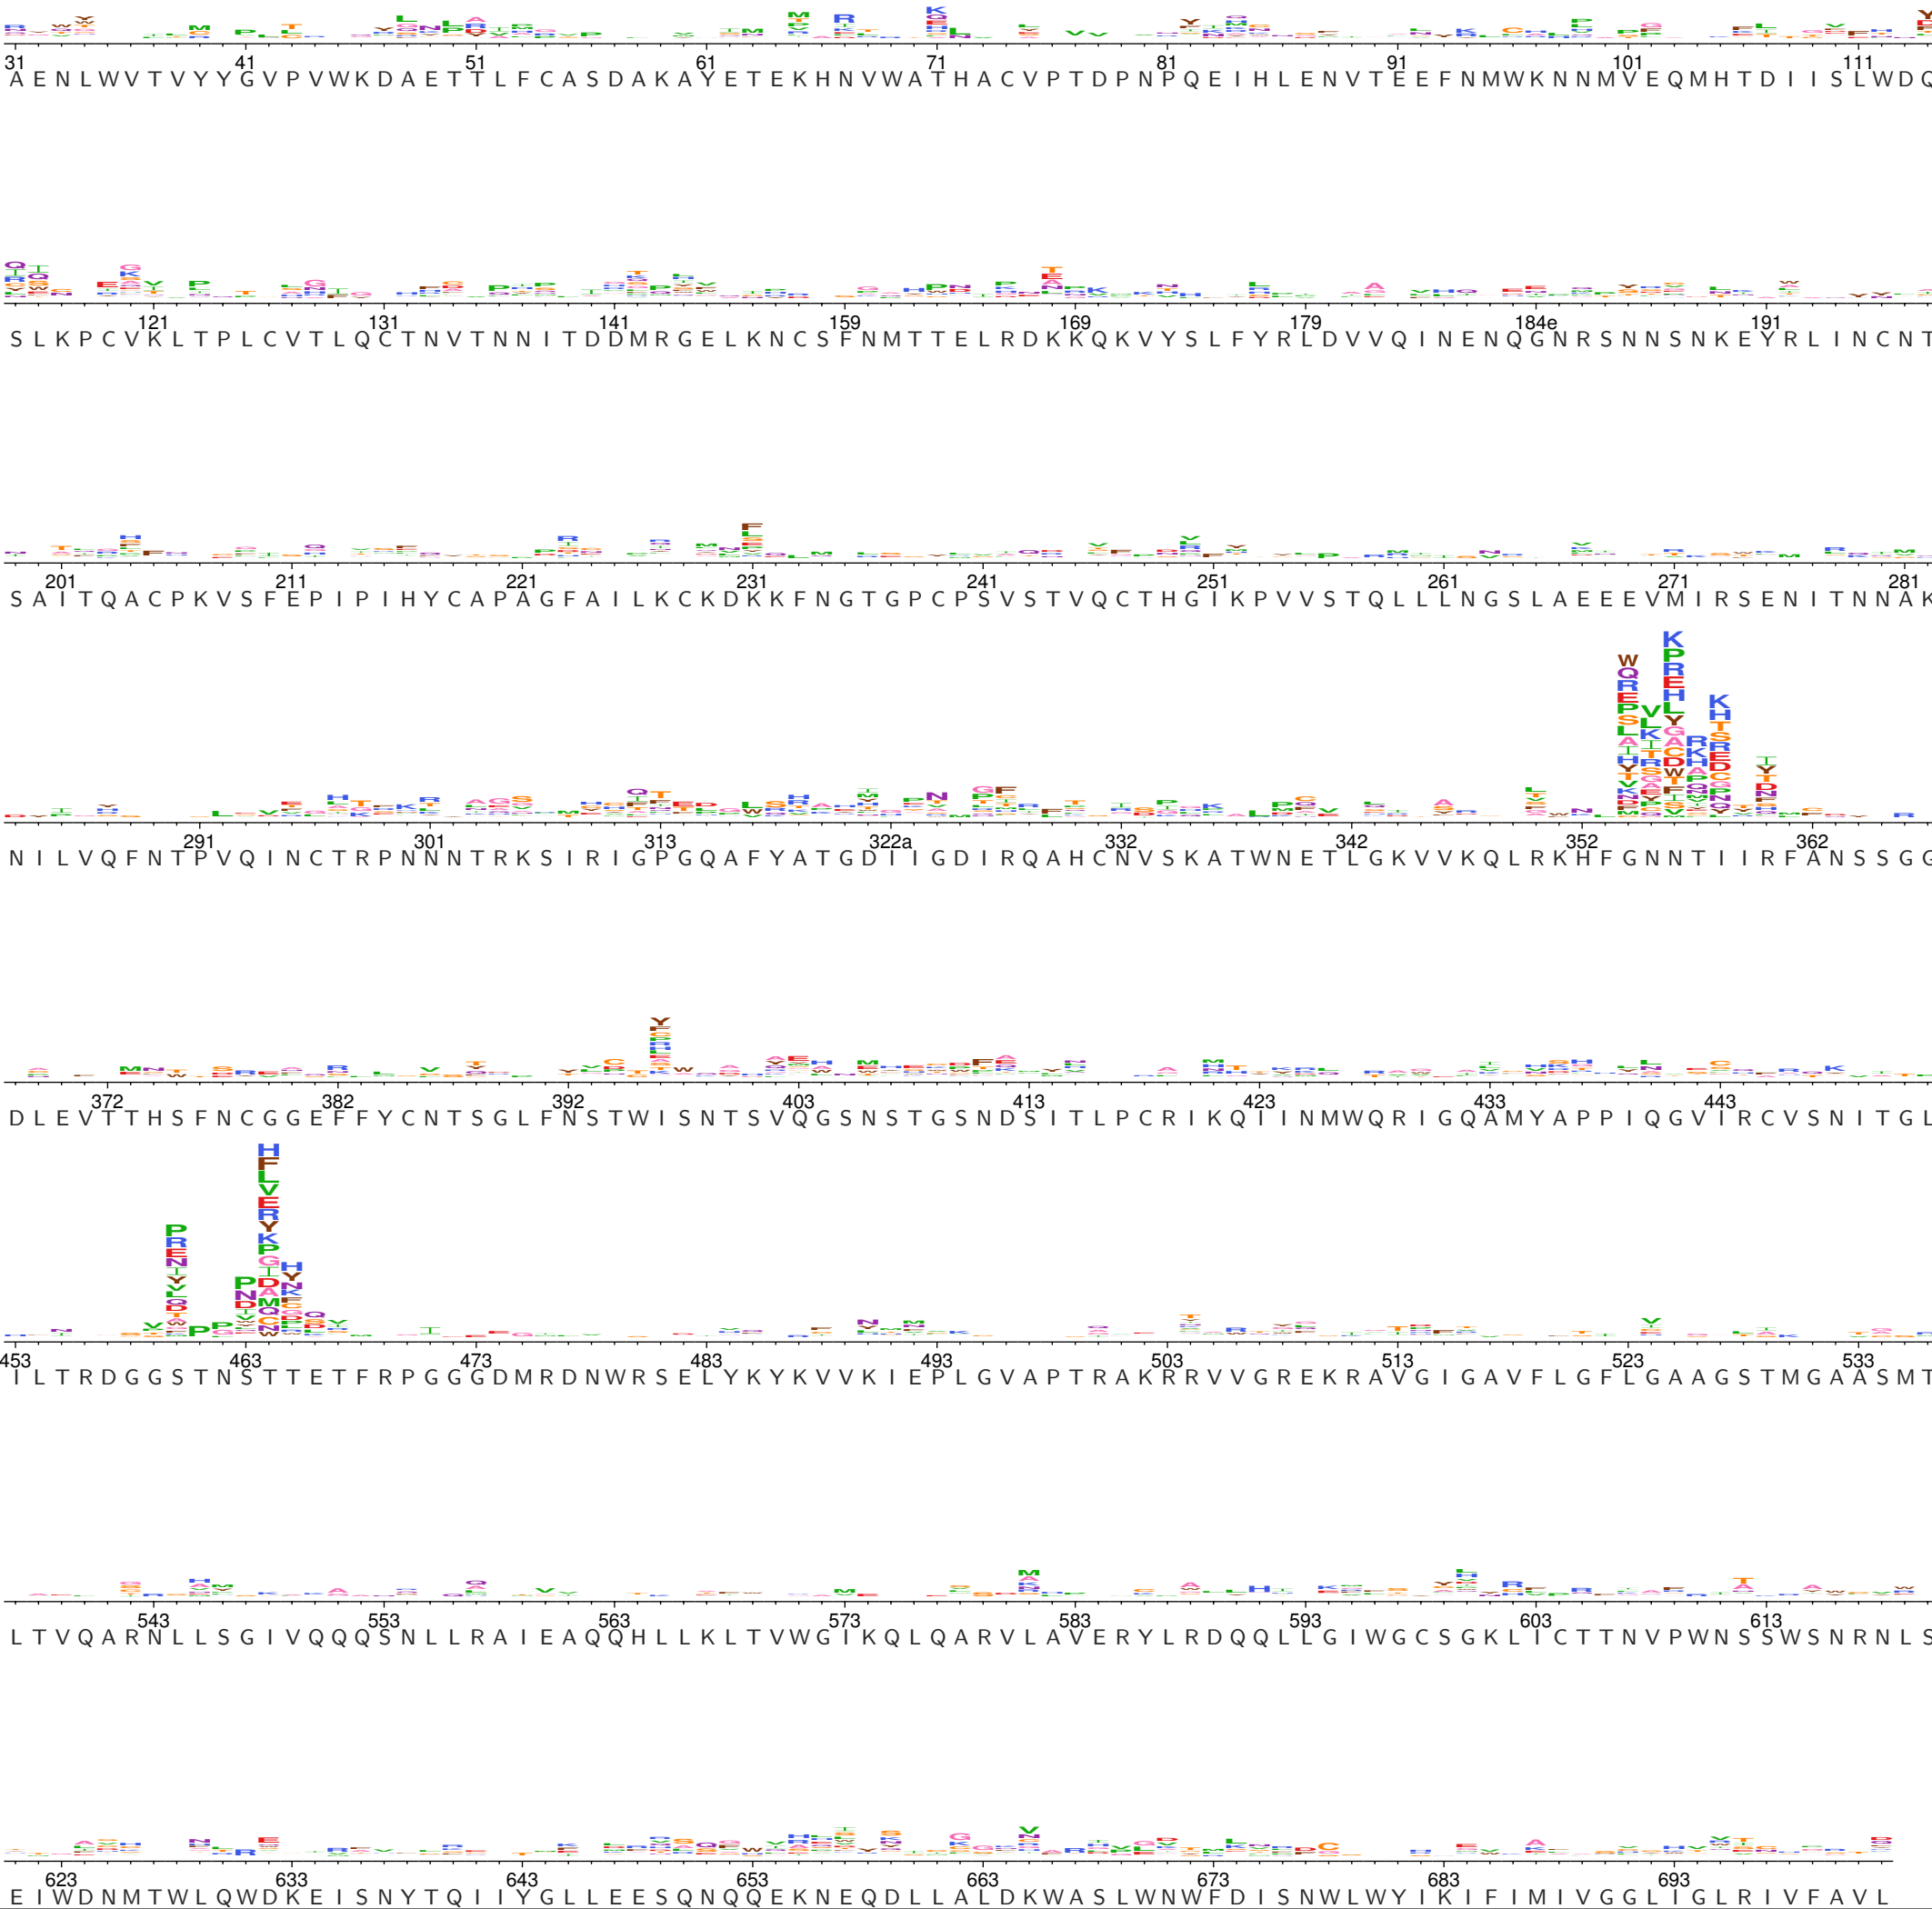

Supplement: supp [file elife-64281-supp-v1.zip]

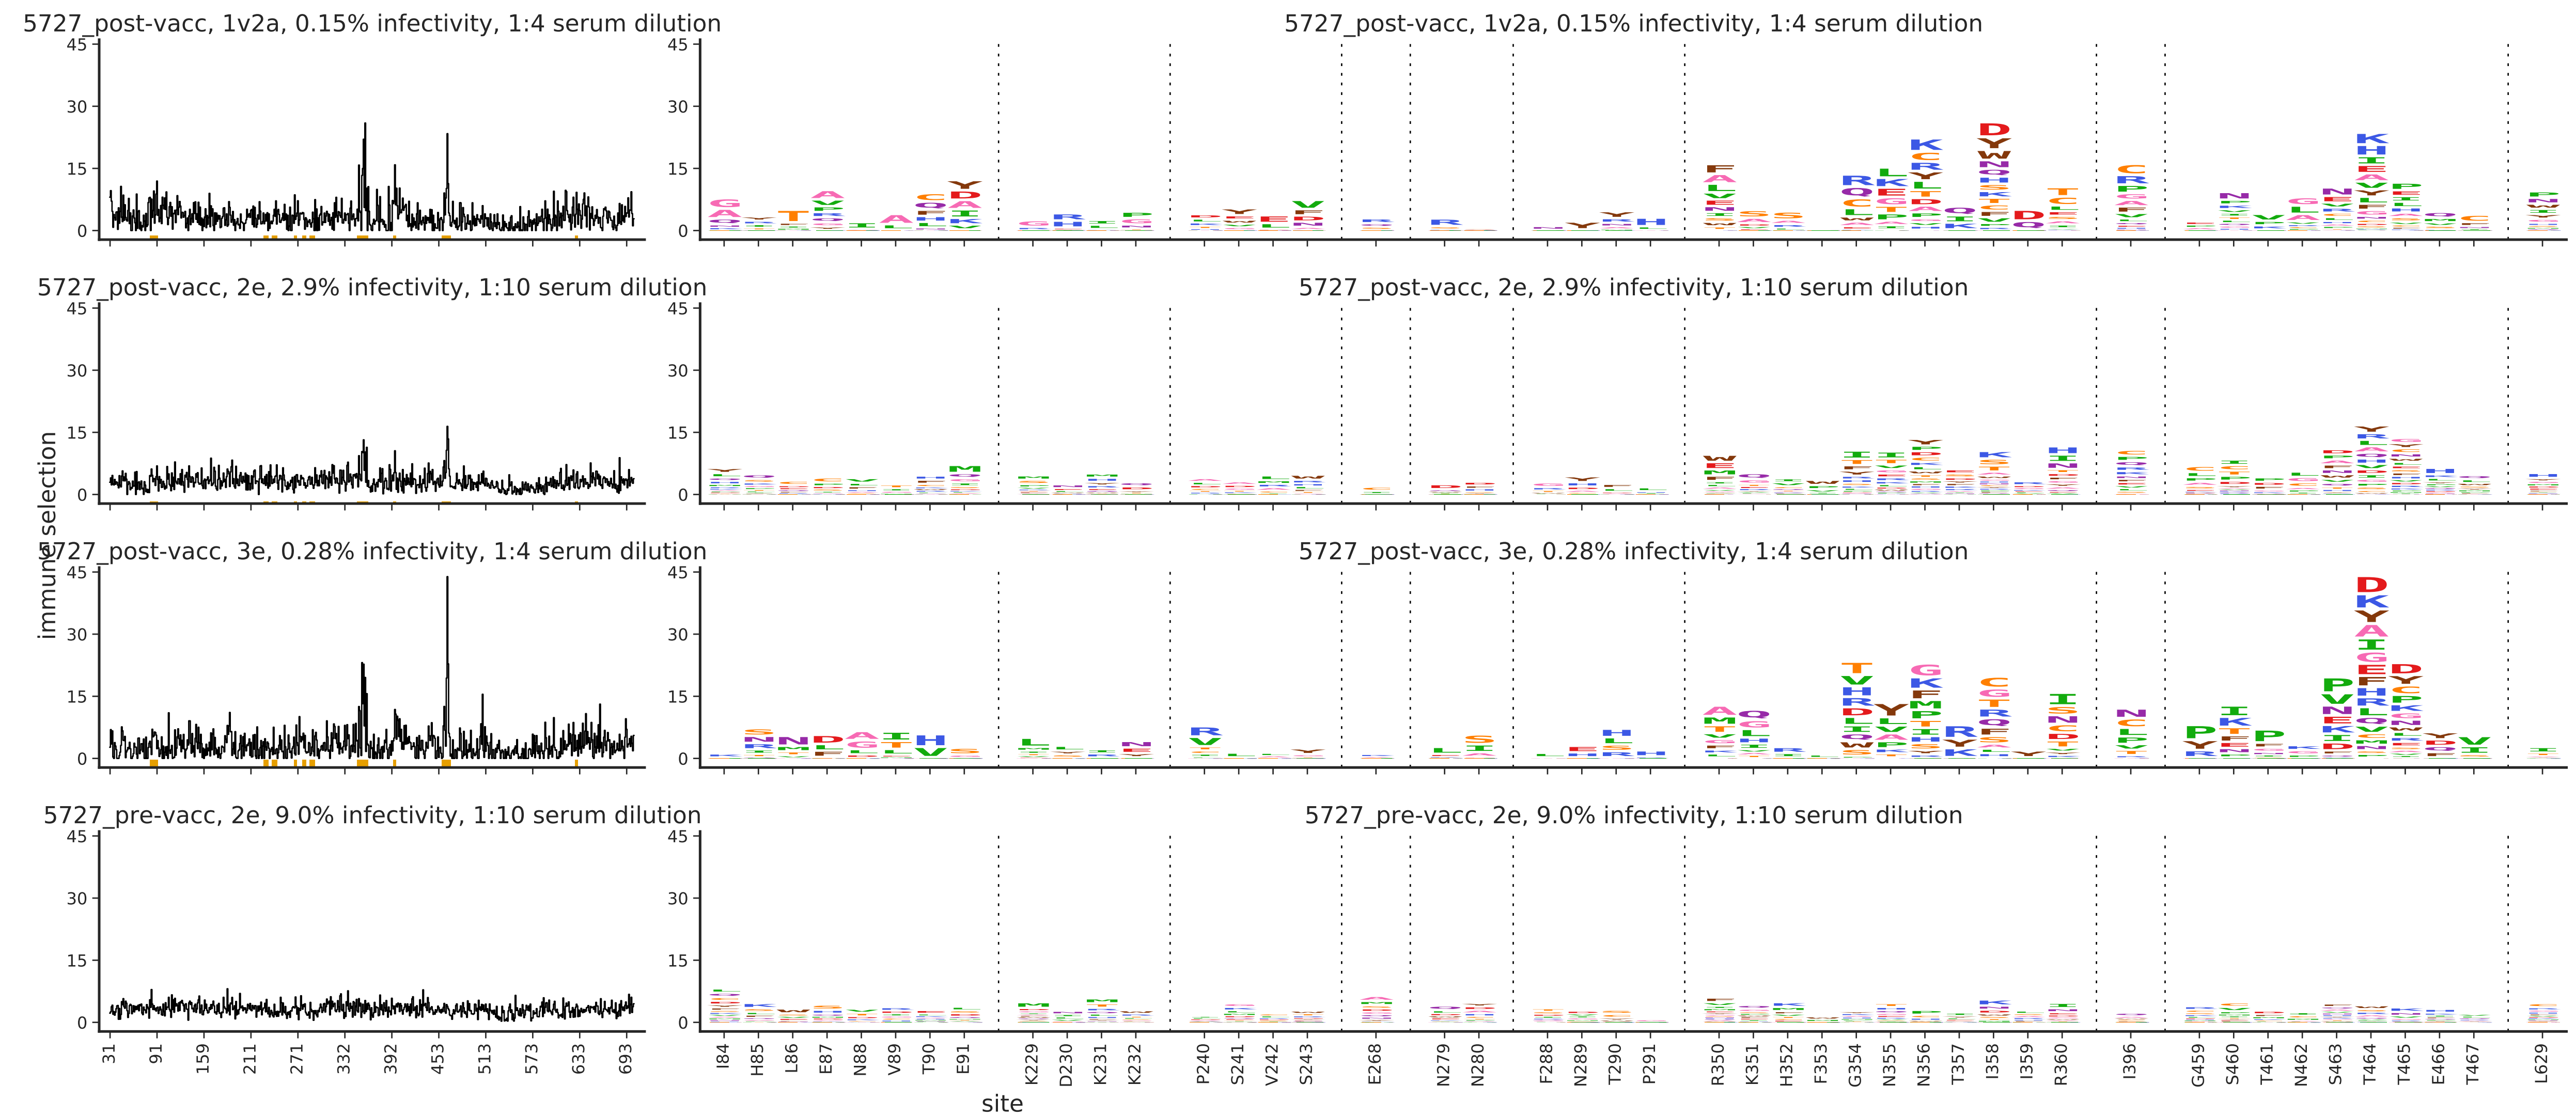

Supplement: supp [file elife-64281-supp-v1.zip]

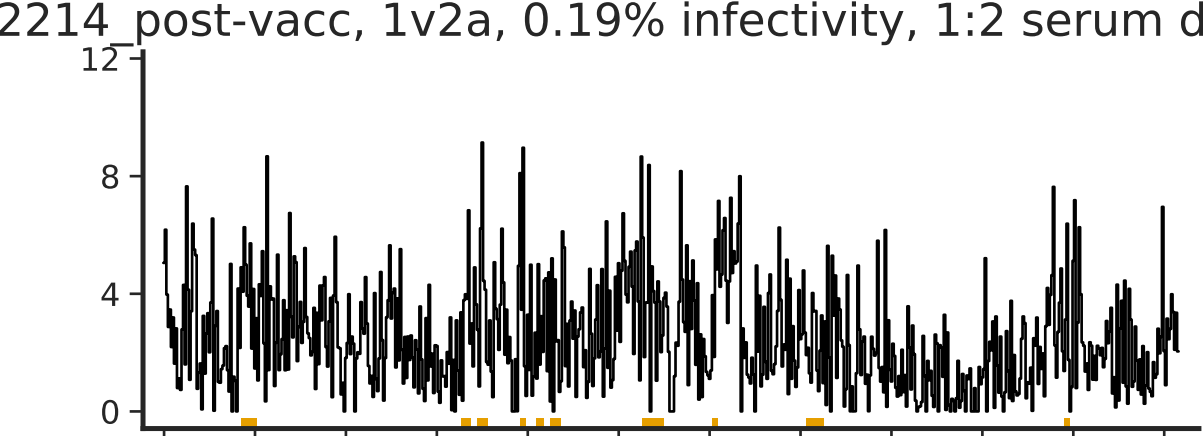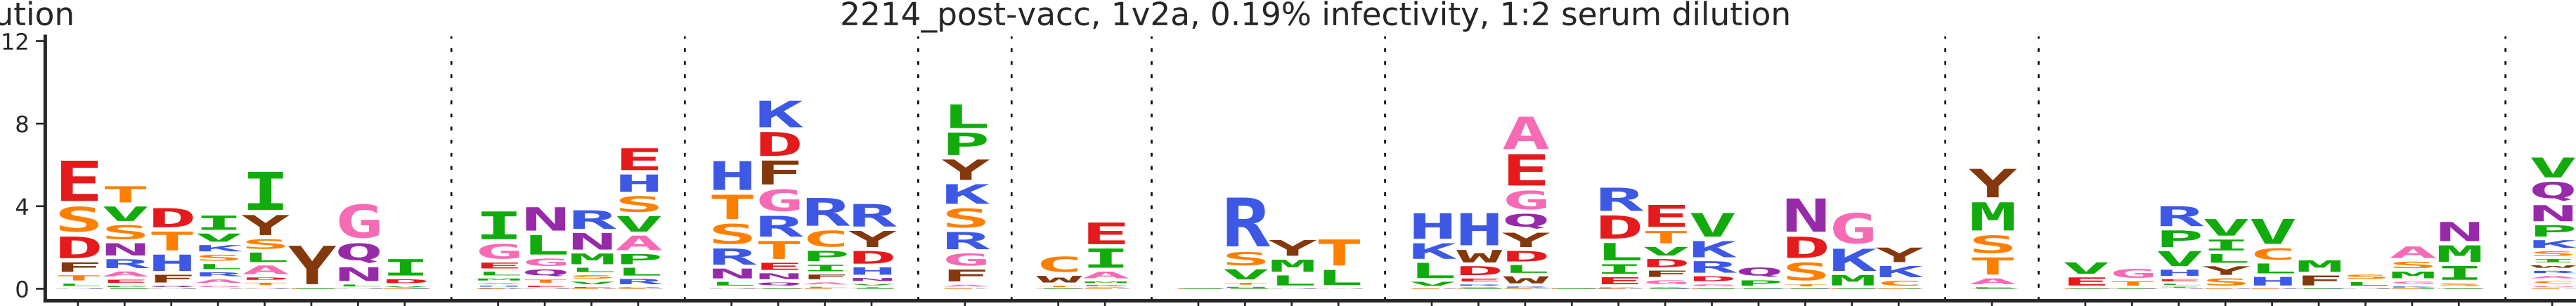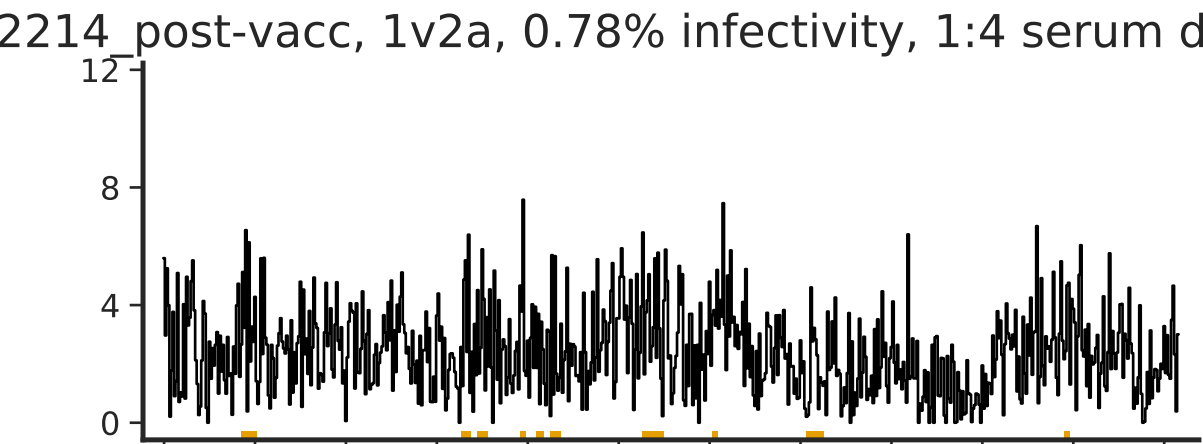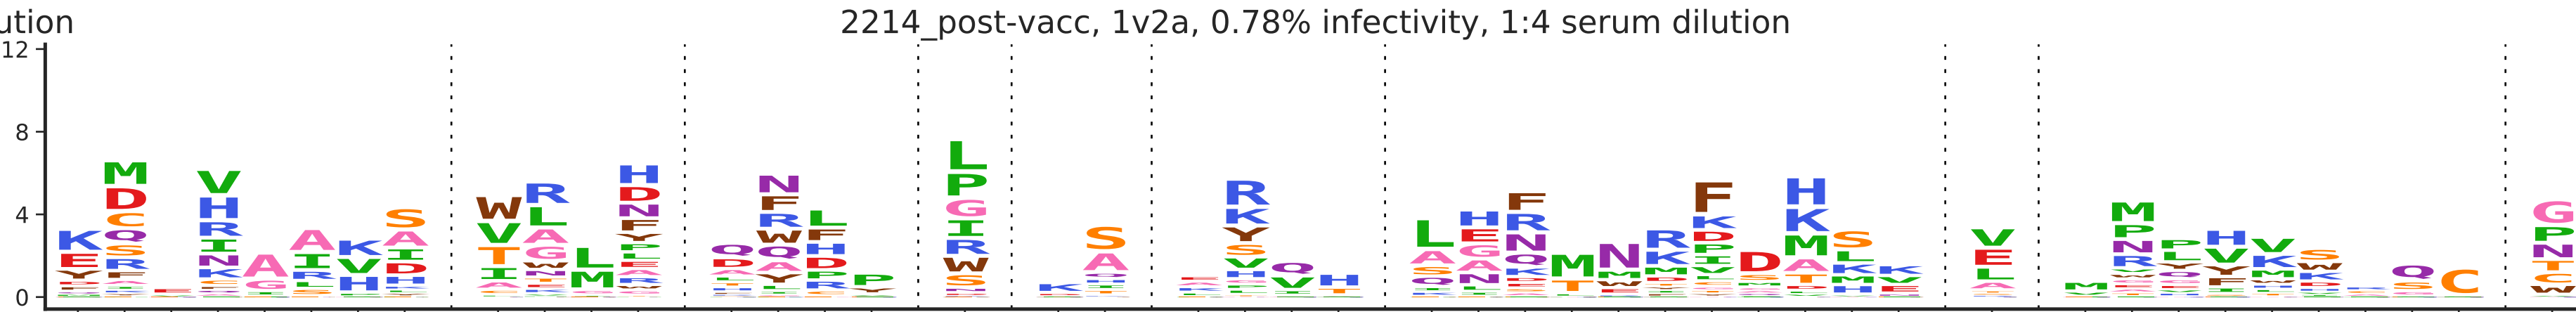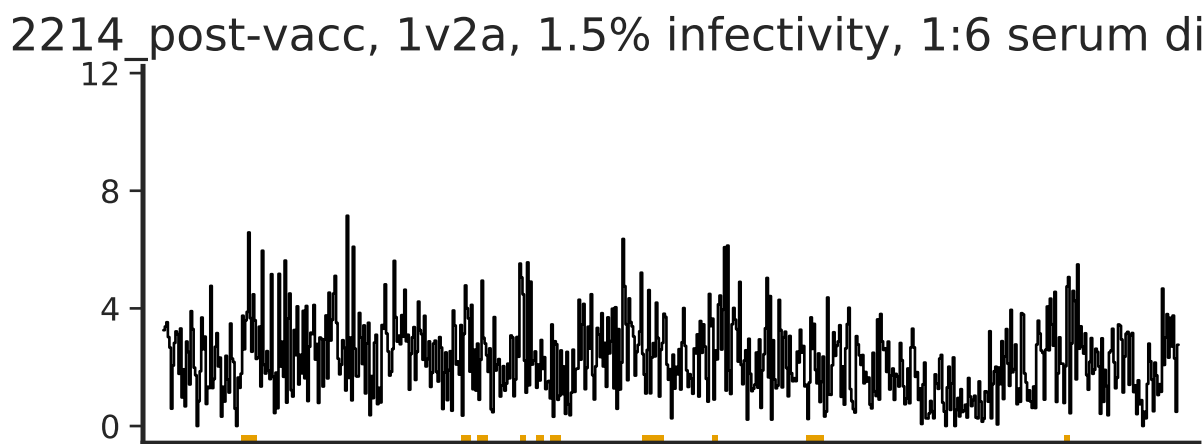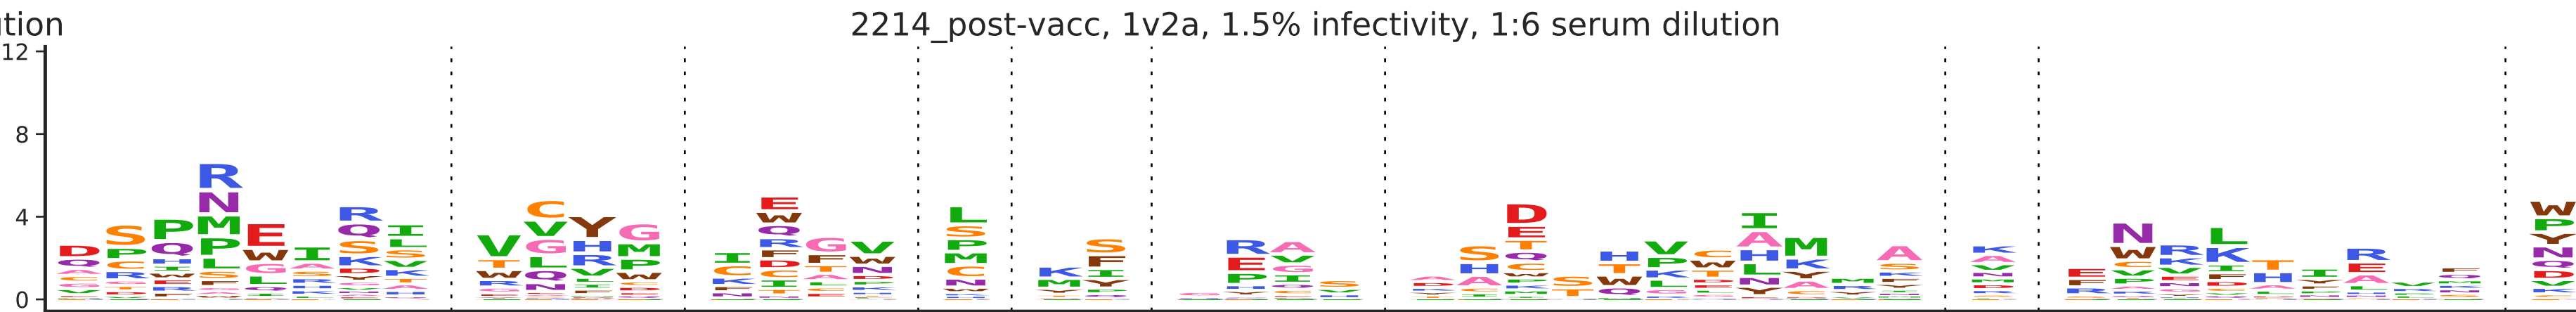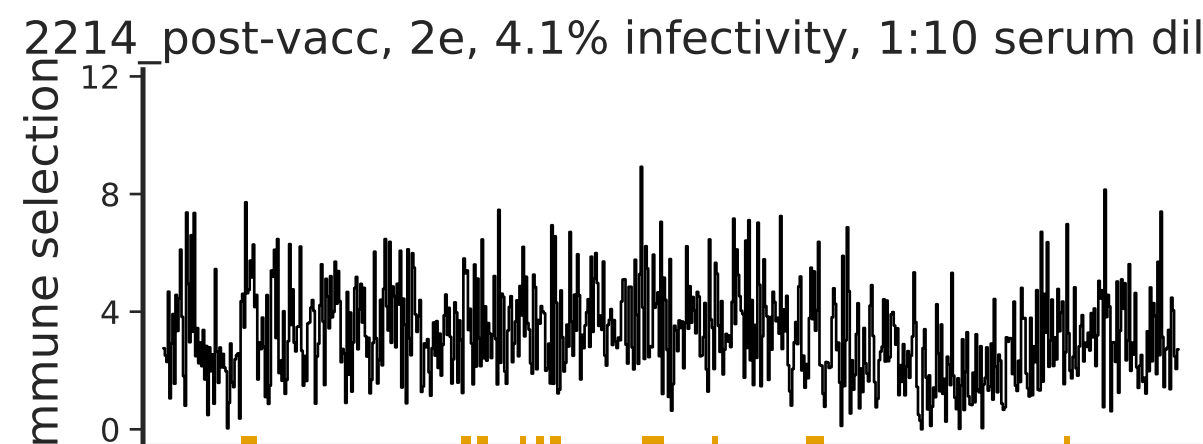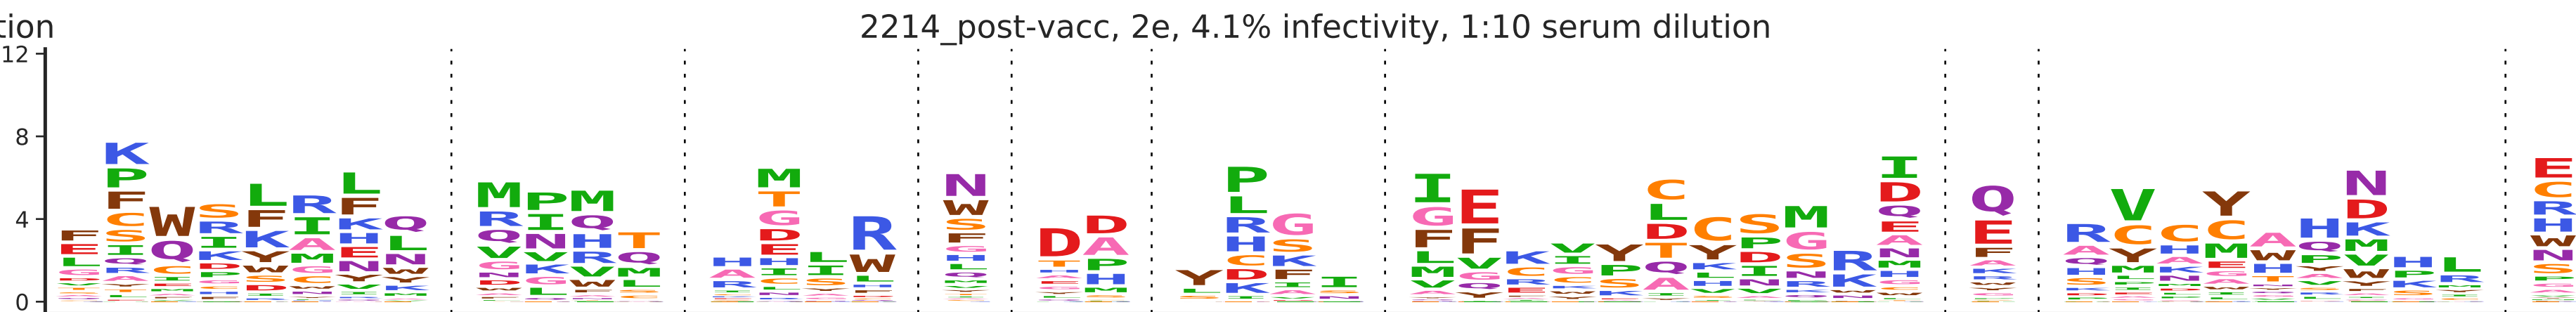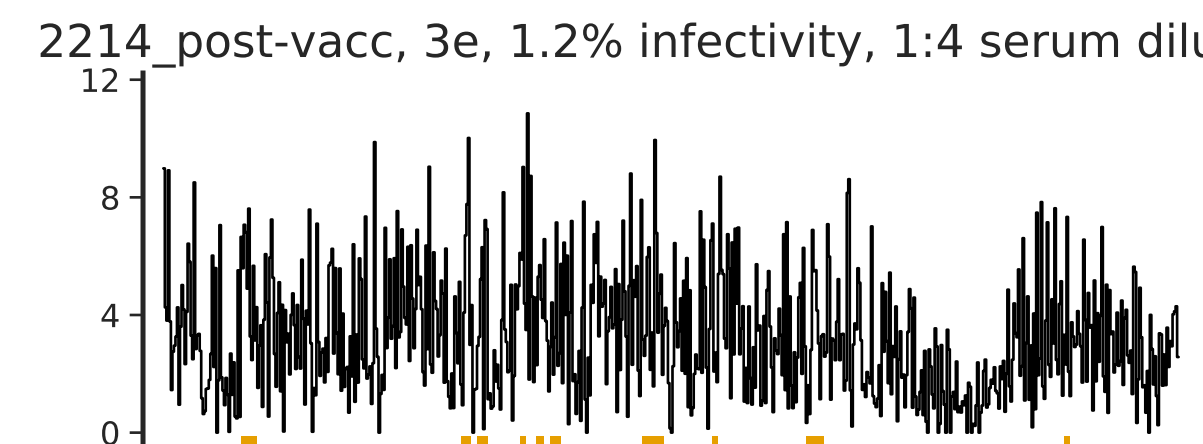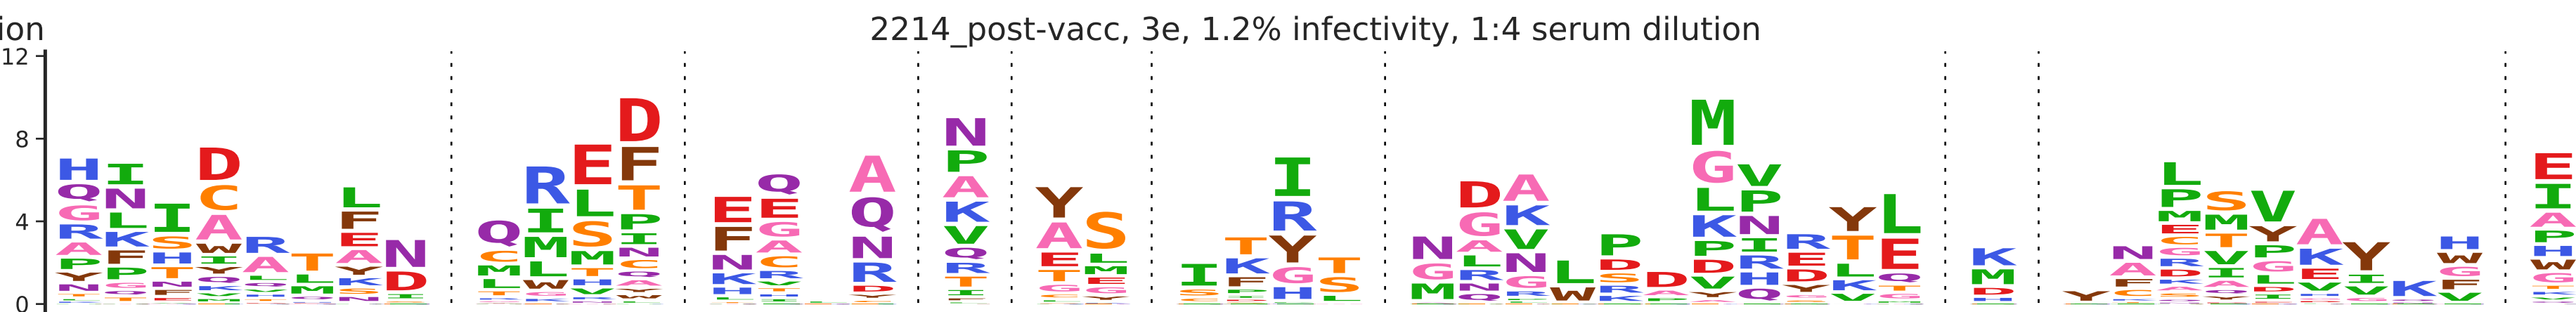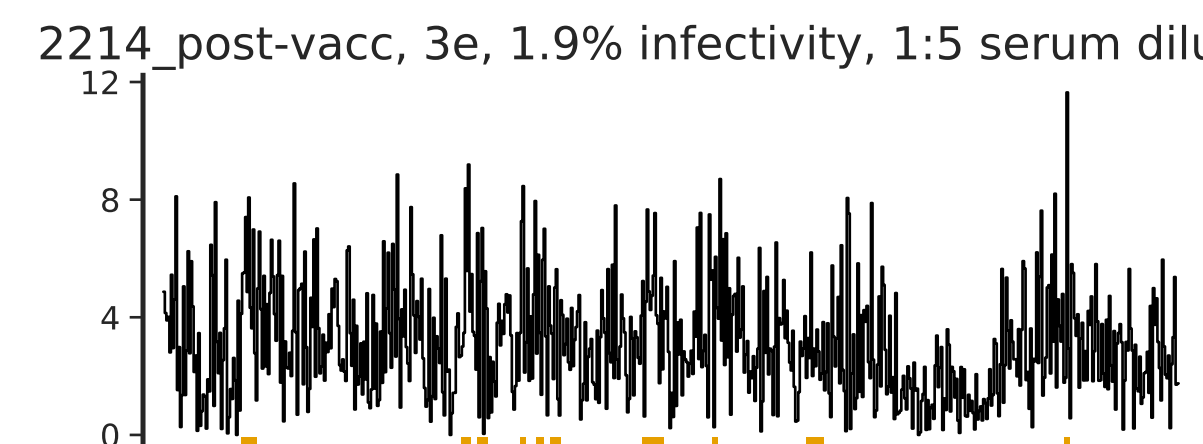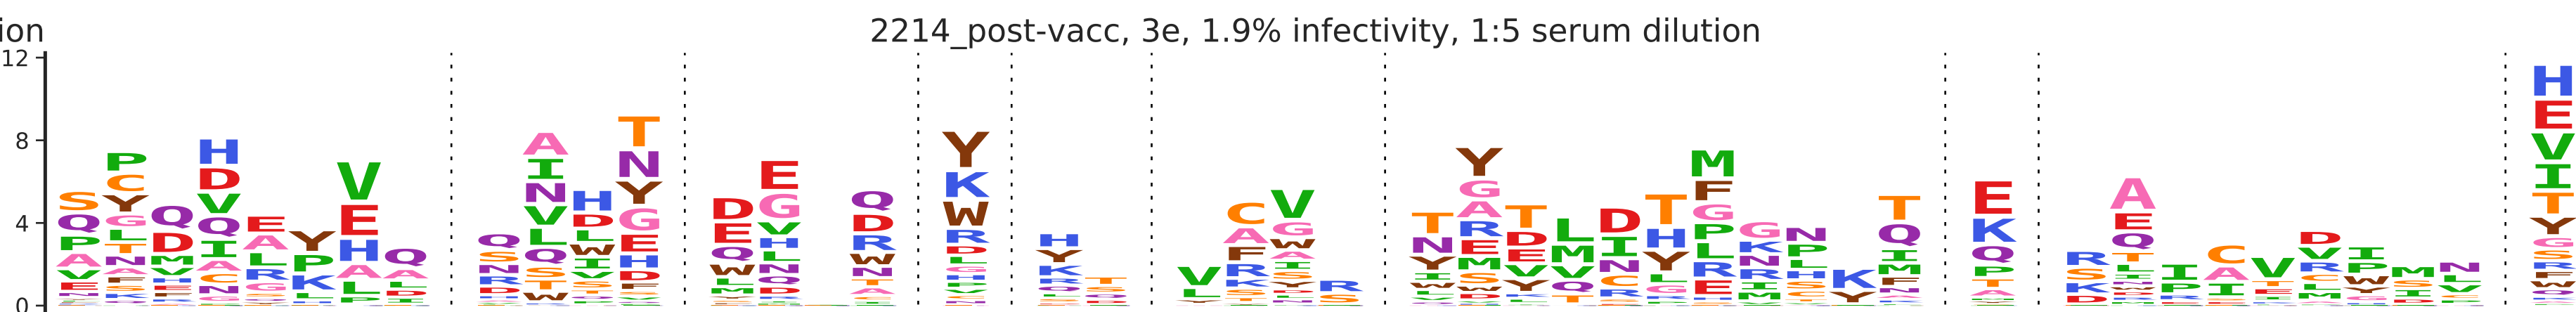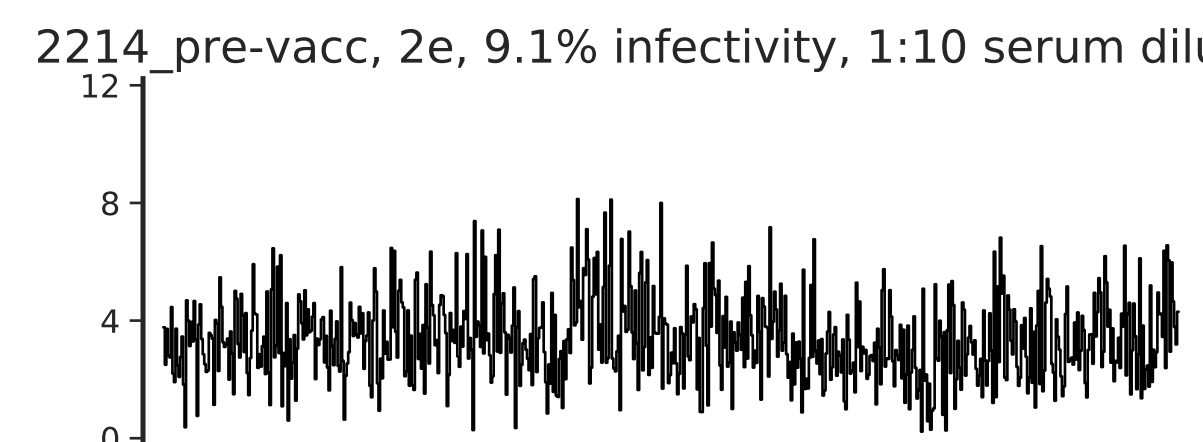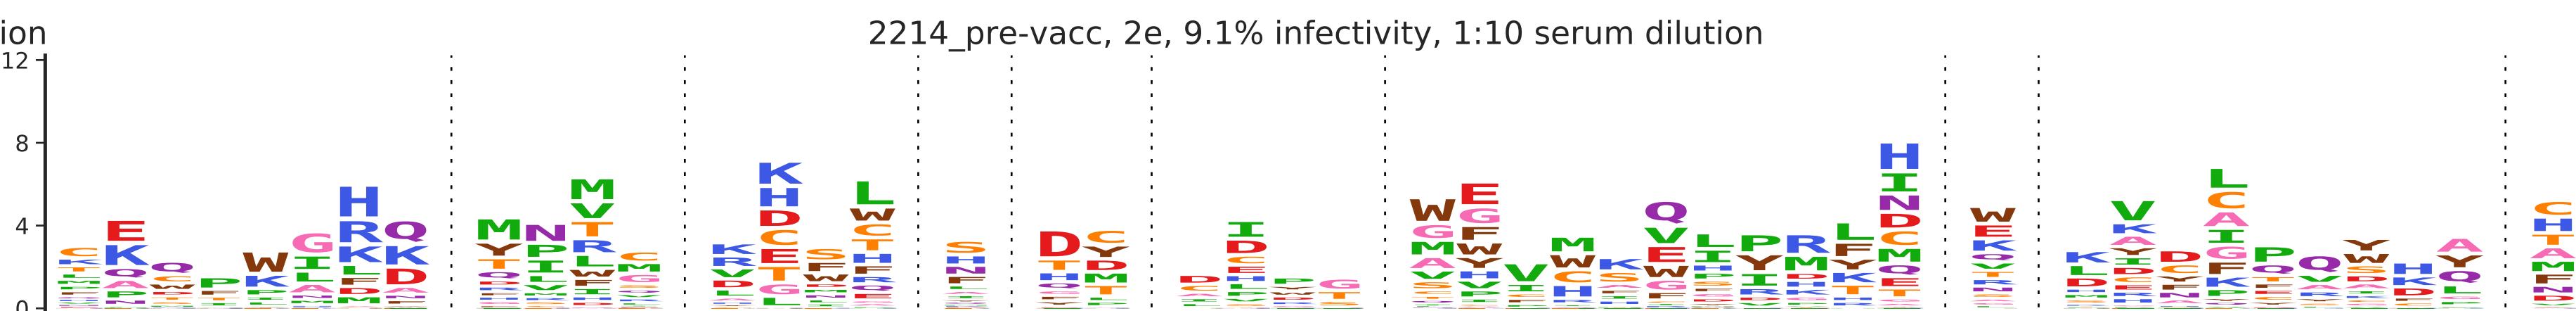

site

Supplement: supp [file elife-64281-supp-v1.zip]

ldifferential selection = 2

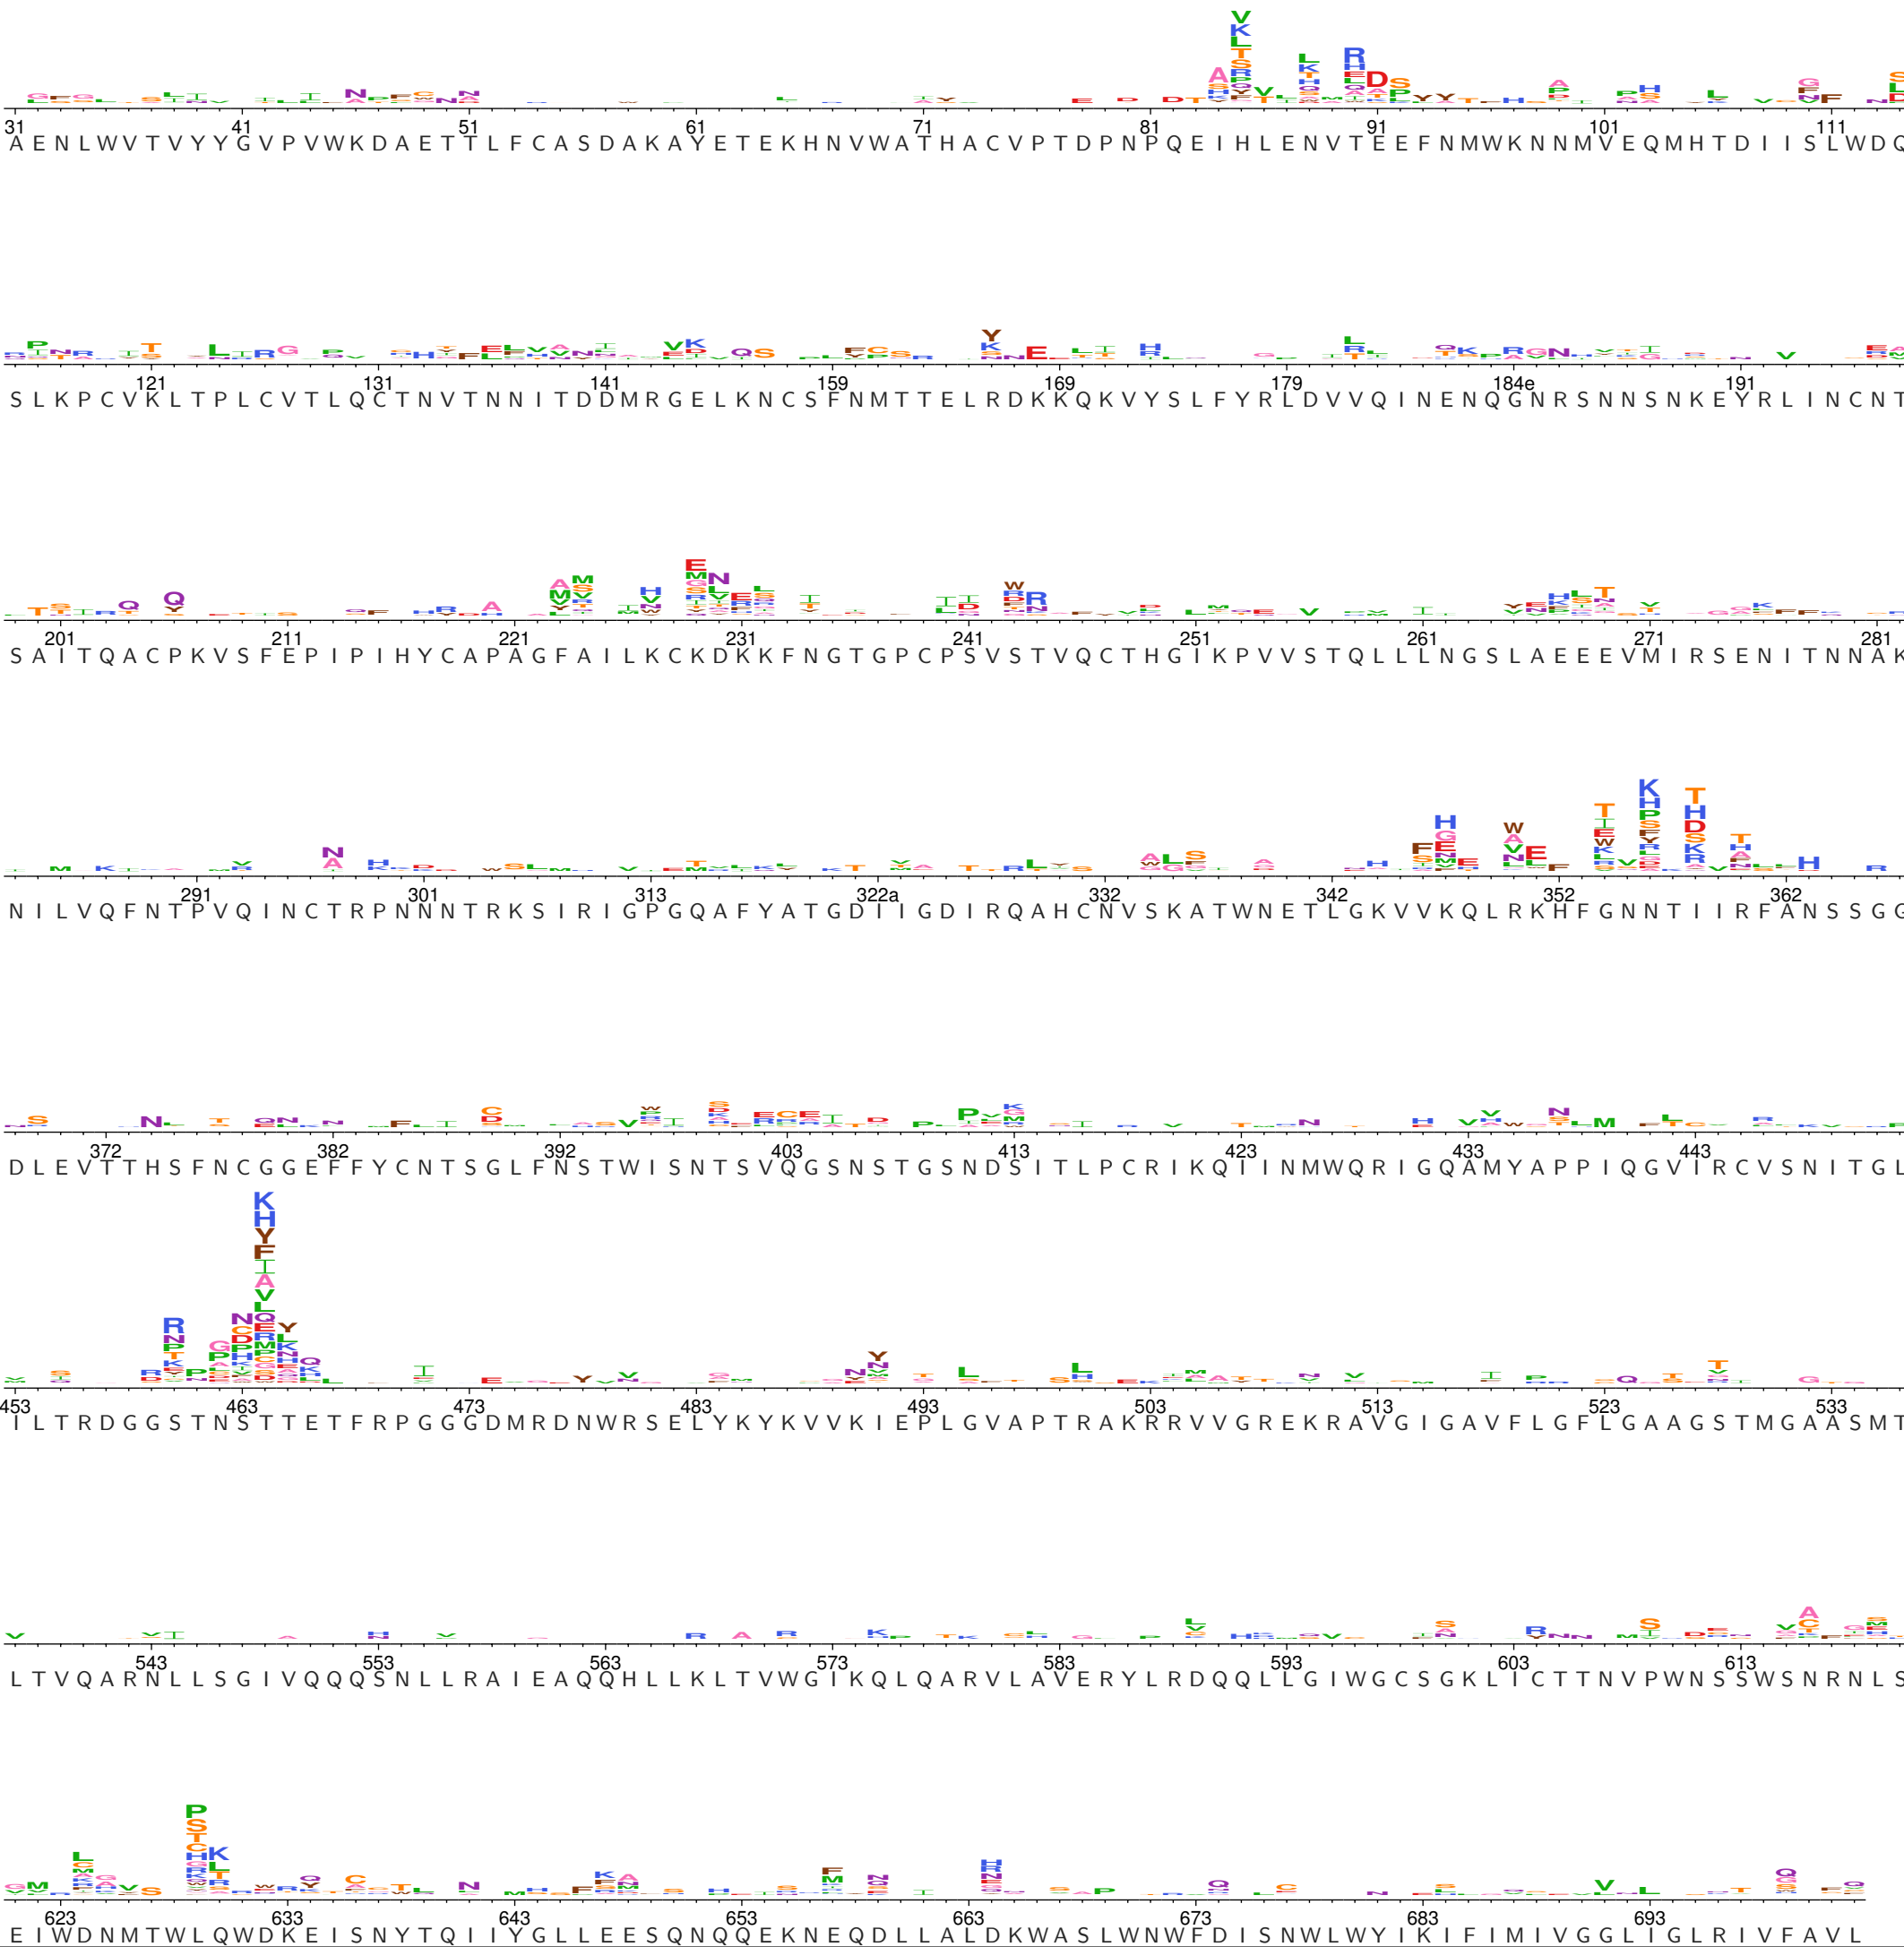

Supplement: supp [file elife-64281-supp-v1.zip]

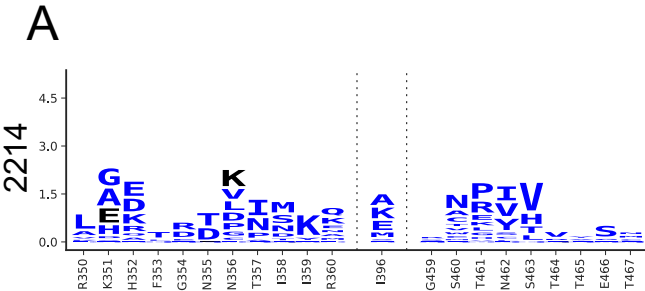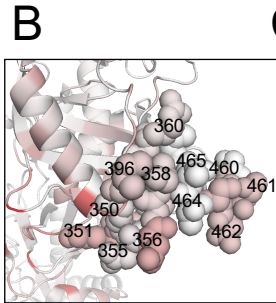

**C**

| 2214-Wk43 | TZM-bi ID <sub>50</sub><br>WT / Mutant<br>(SD) | TZM-bi MNP<br>(SD) | MAP Fold<br>Enrichment |
|-----------|------------------------------------------------|--------------------|------------------------|
| R350M     | 1.3 (0.4)                                      | 92 (1)             | 0.6                    |
| K351E     | 2.3 (1.2)                                      | 86 (*)             | 1.4                    |
| N355L     | 0.5 (0.4)                                      | 103 (13)           | 1.0                    |
| N356K     | 0.6 (0.4)                                      | 96 (6)             | 1.5                    |
| I358K     | 0.7 (0.1)                                      | 97 (9)             | 0.9                    |
| T464H     | 1.3 (0.9)                                      | 95 (10)            | 0.8                    |
| T464K     | 0.6 (0.2)                                      | 89 (9)             | 1.0                    |

Supplement: supp [file elife-64281-supp-v1.zip]

| differential selection = 2

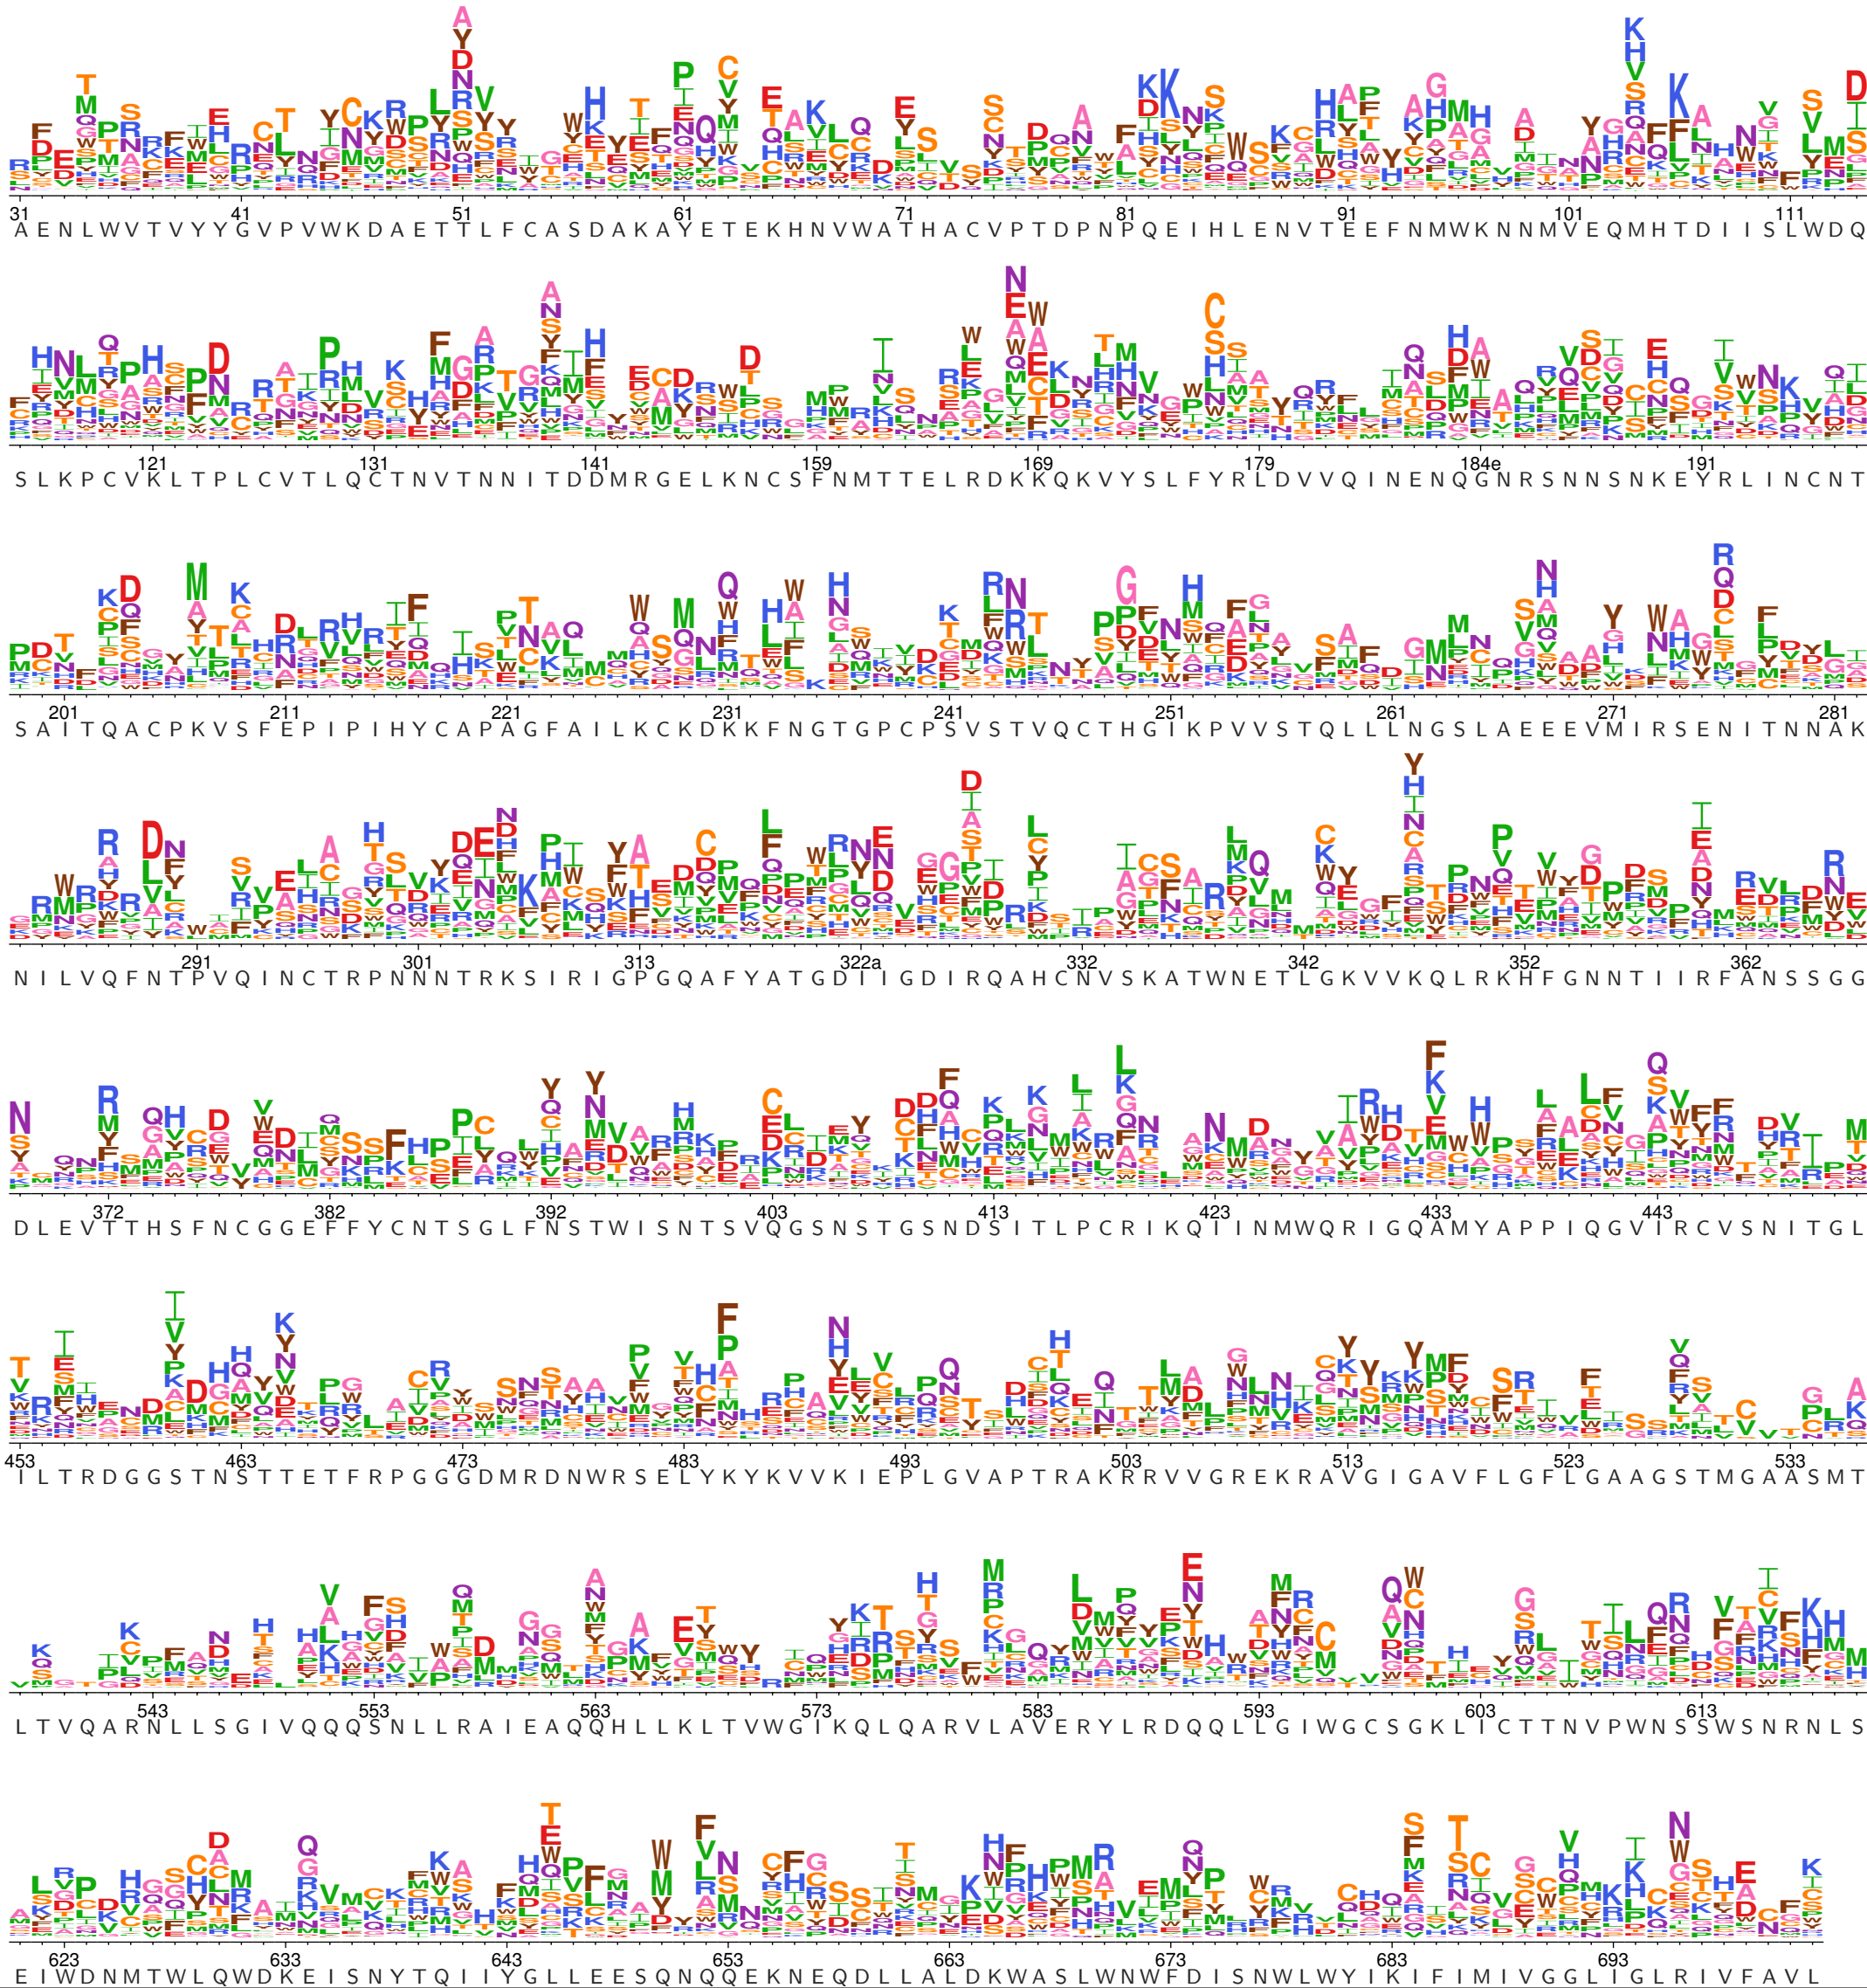

Supplement: supp [file elife-64281-supp-v1.zip]

ldifferential selection = 8

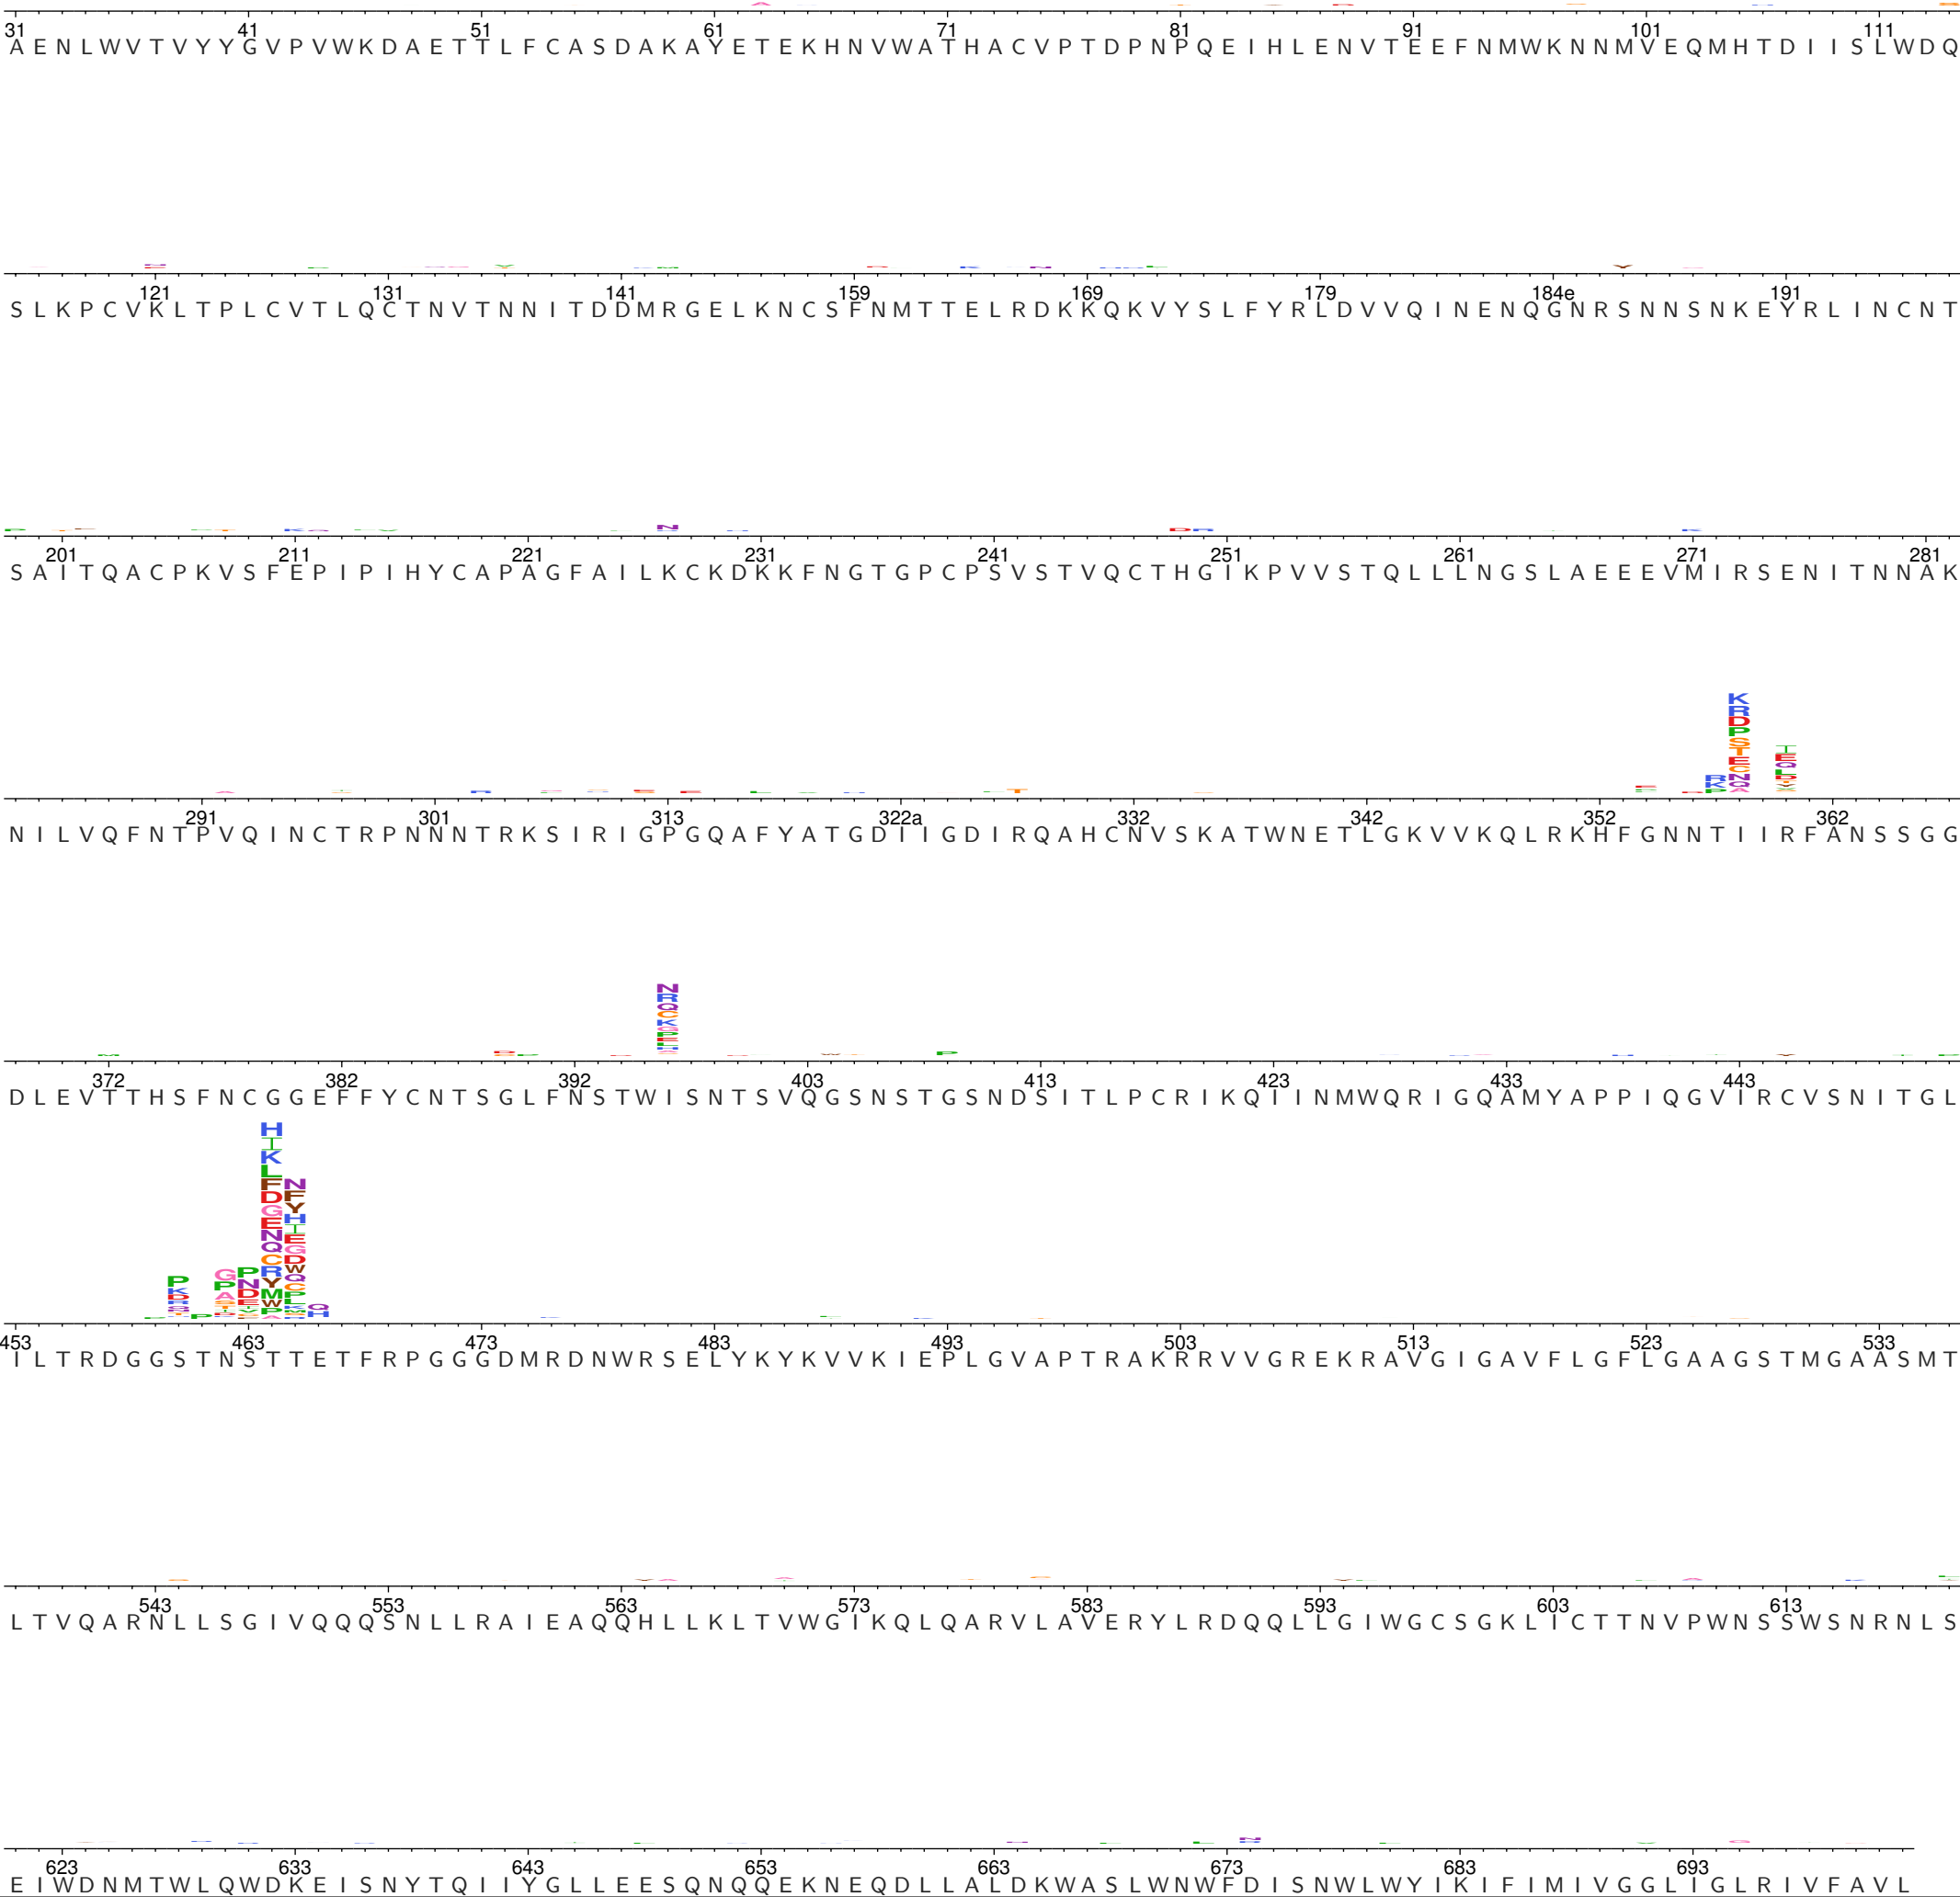

Supplement: supp [file elife-64281-supp-v1.zip]

| differential selection = 2

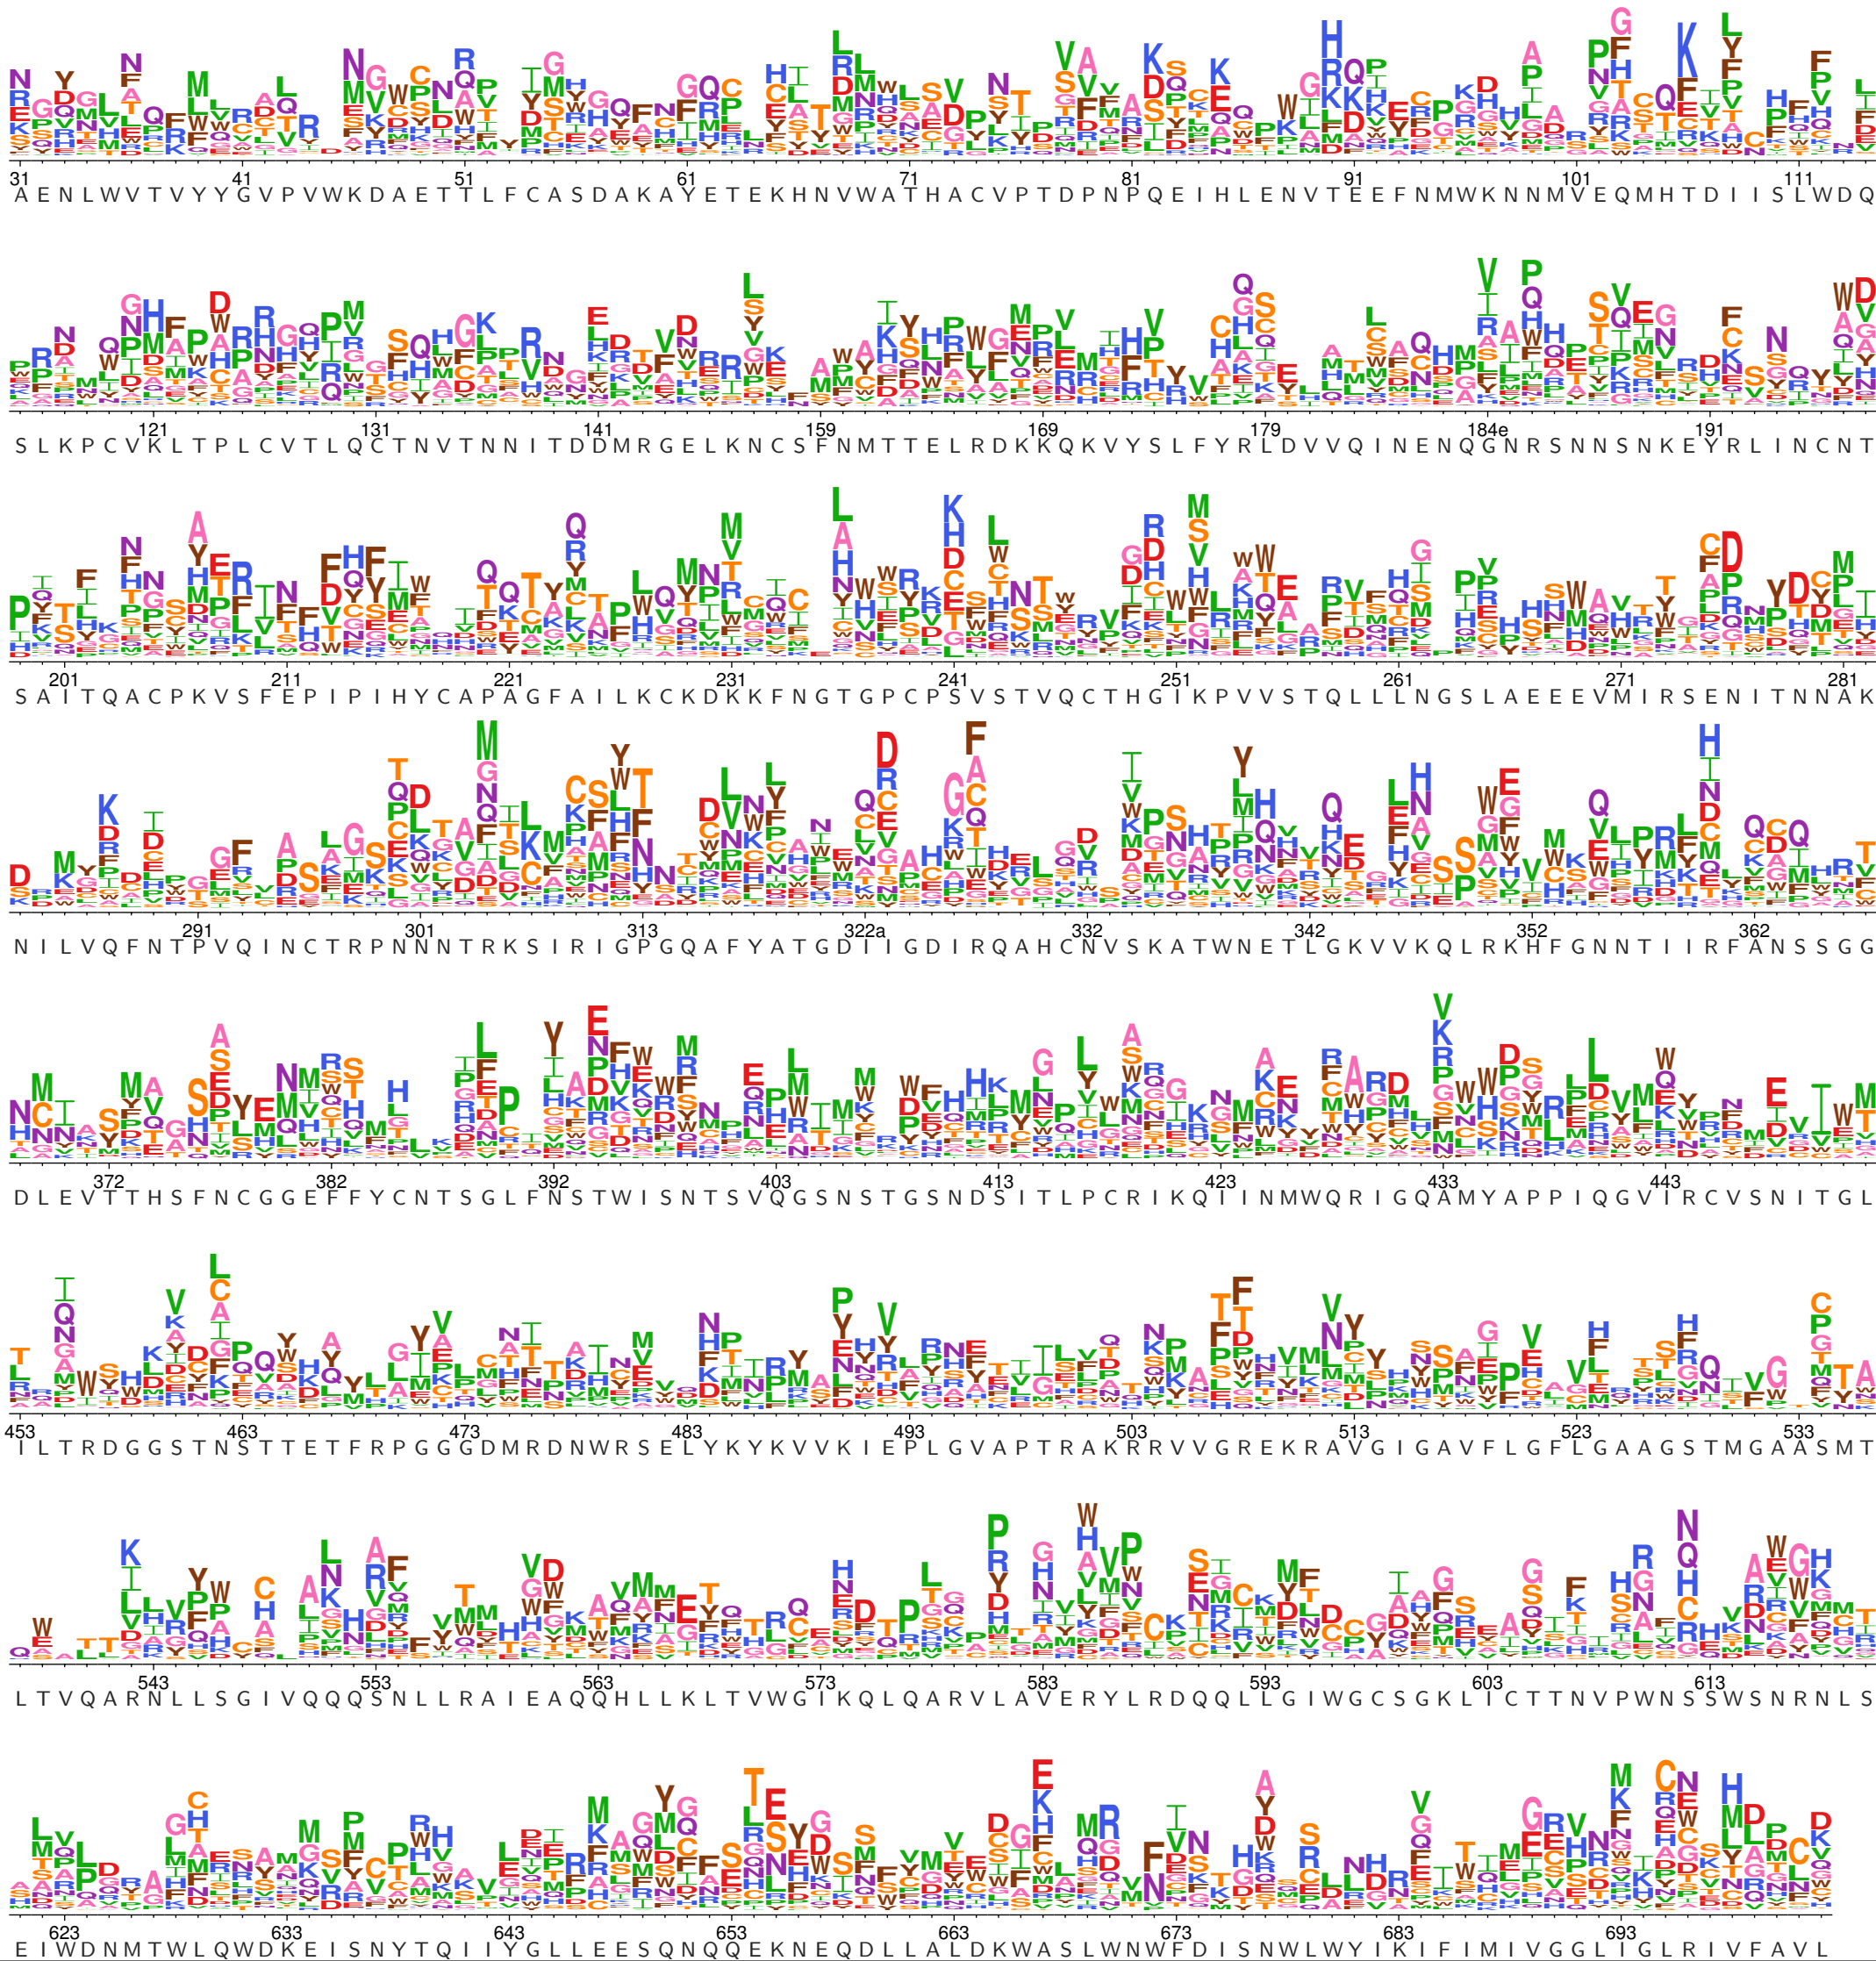

Supplement: supp [file elife-64281-supp-v1.zip]

|differential selection = 2

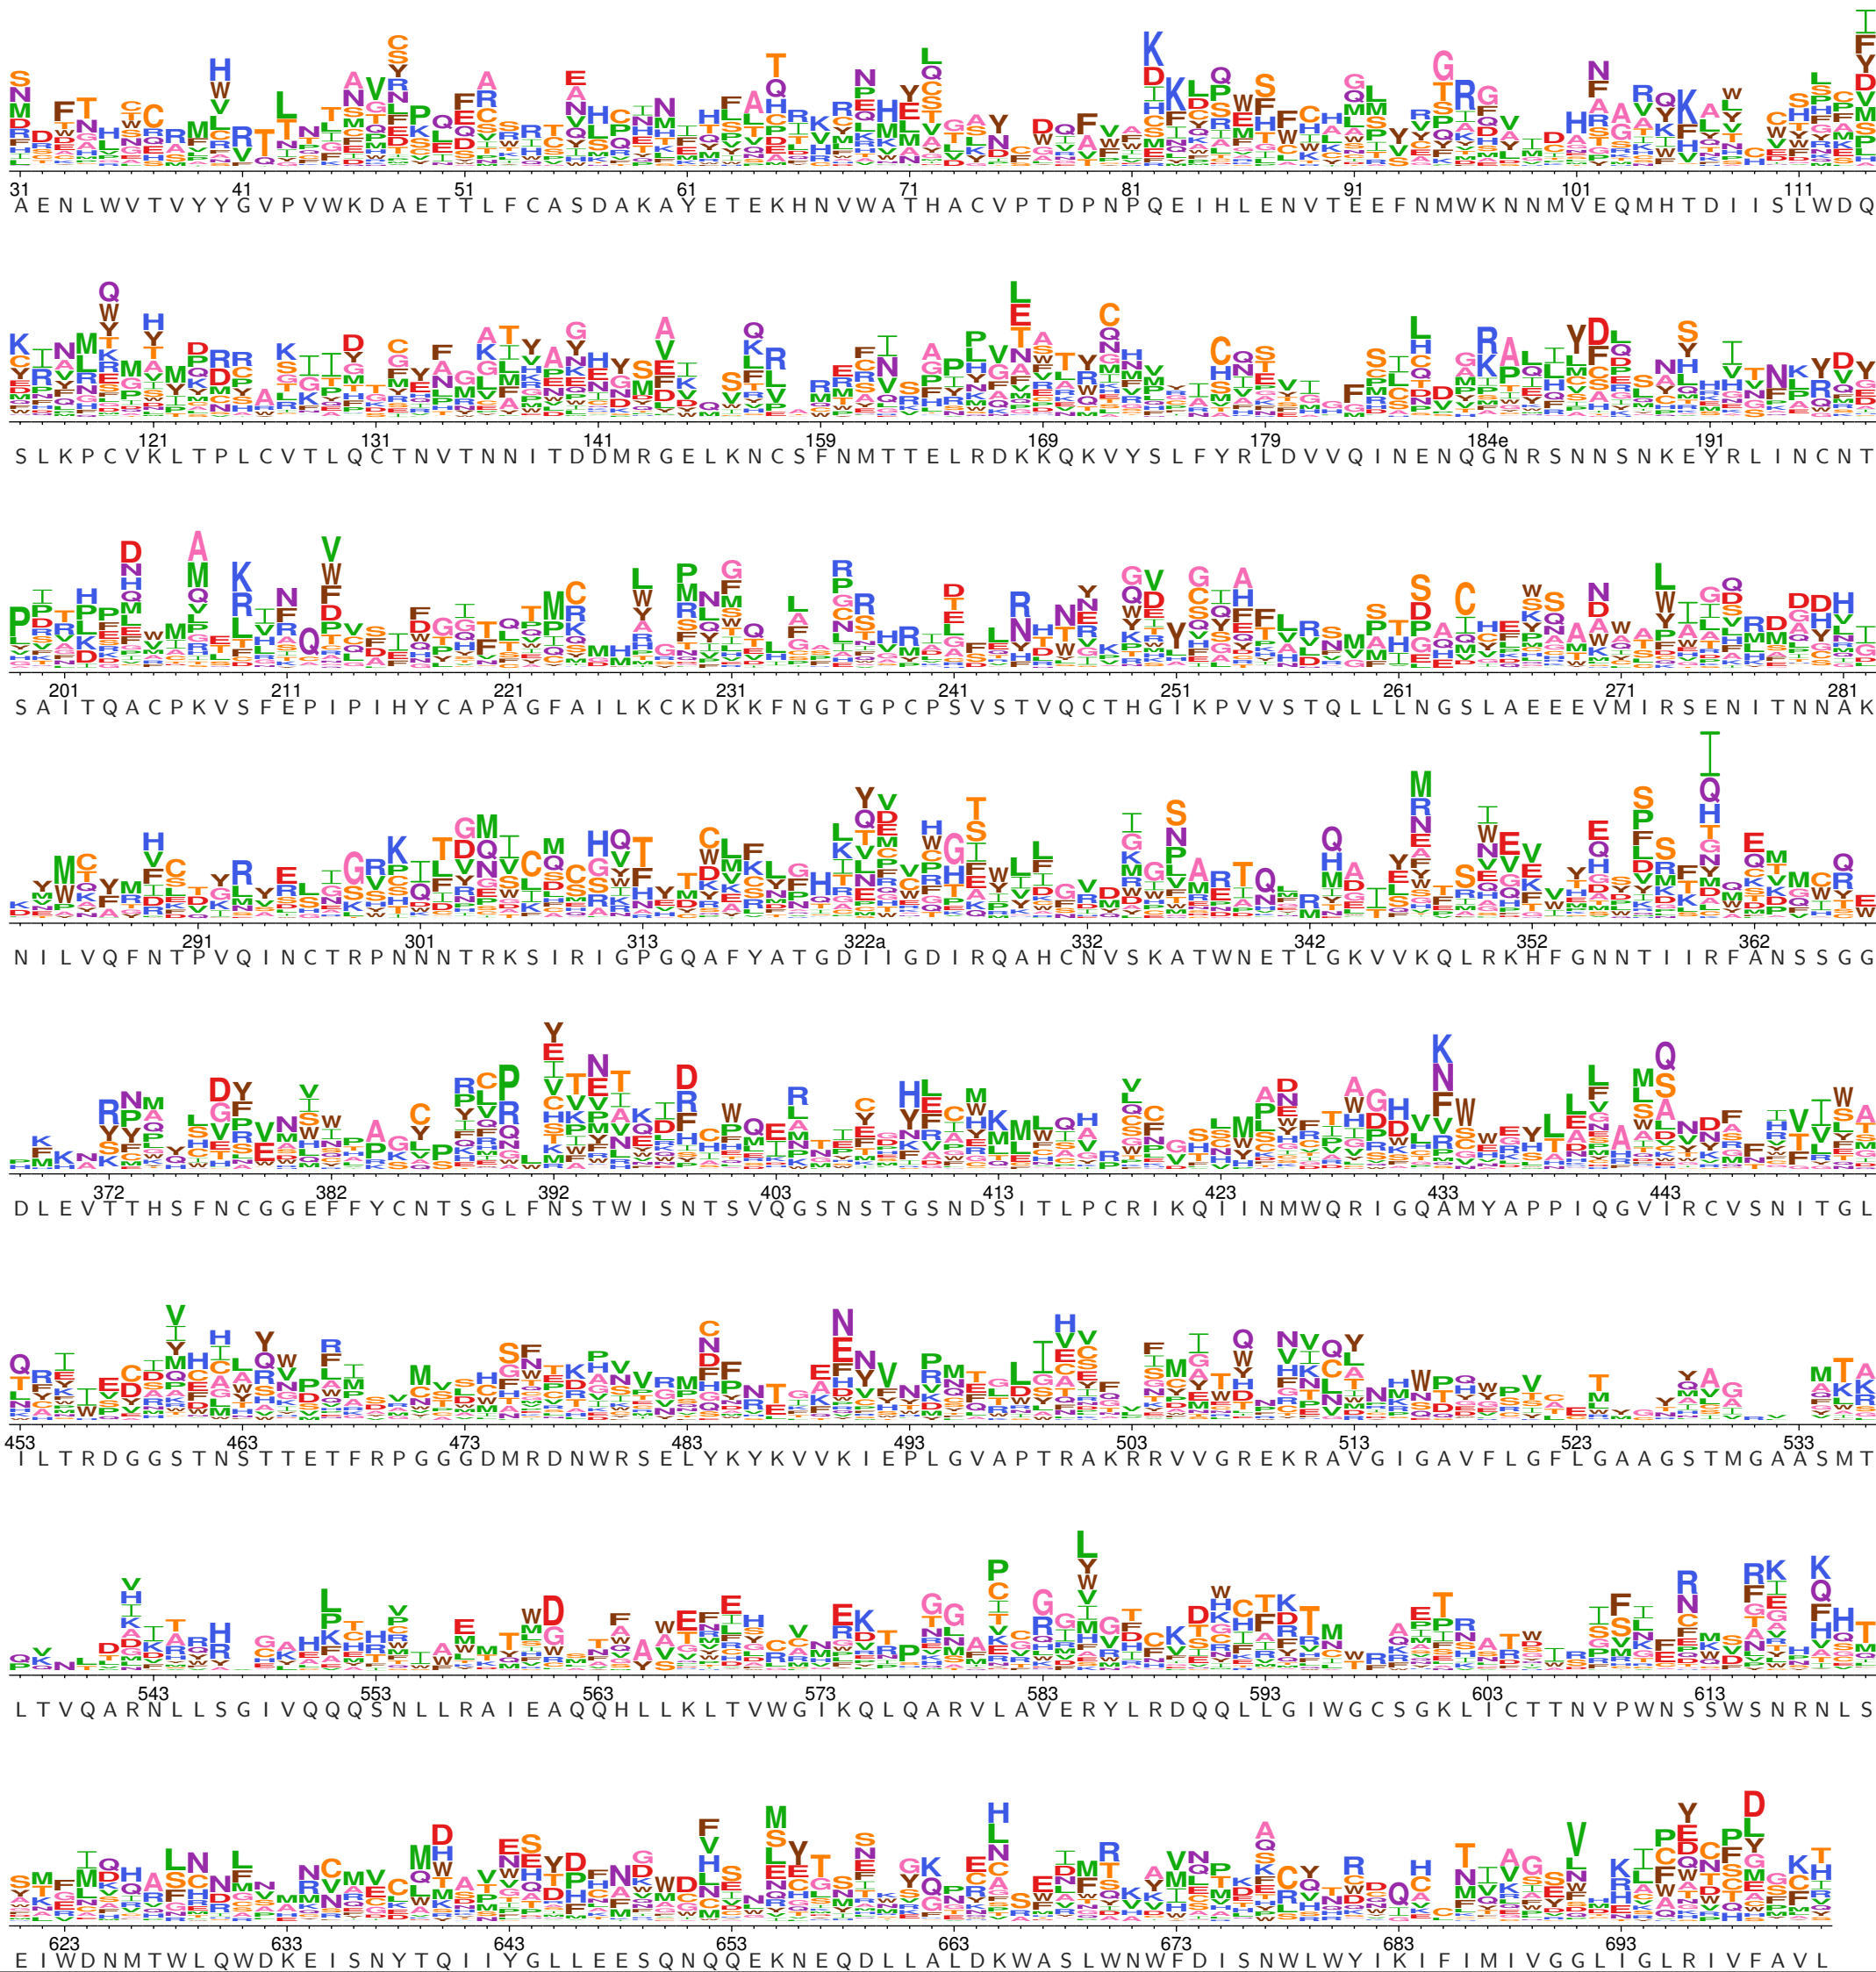

Supplement: supp [file elife-64281-supp-v1.zip]

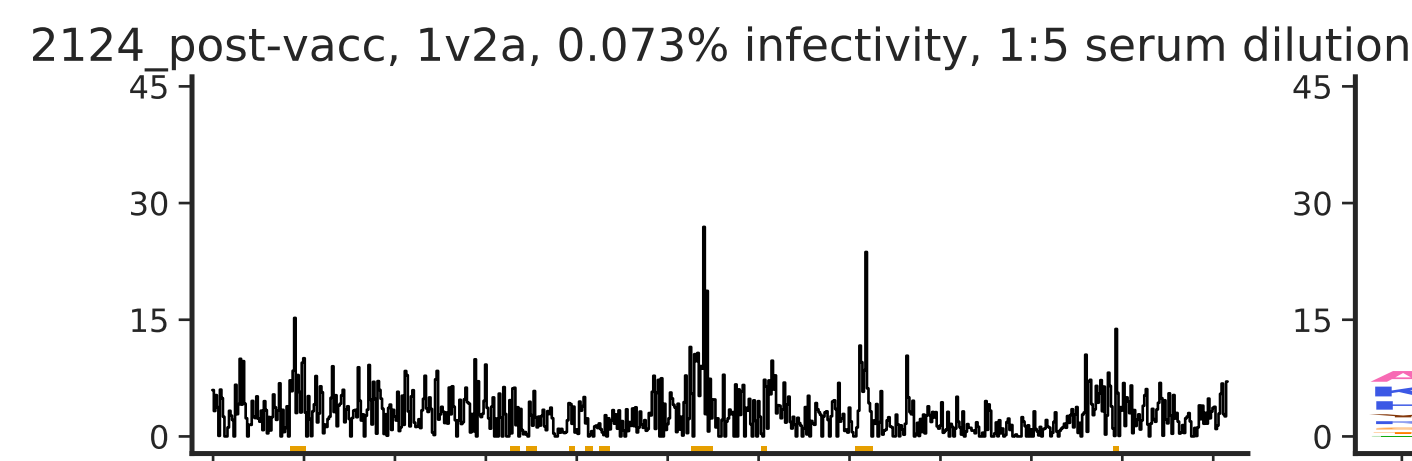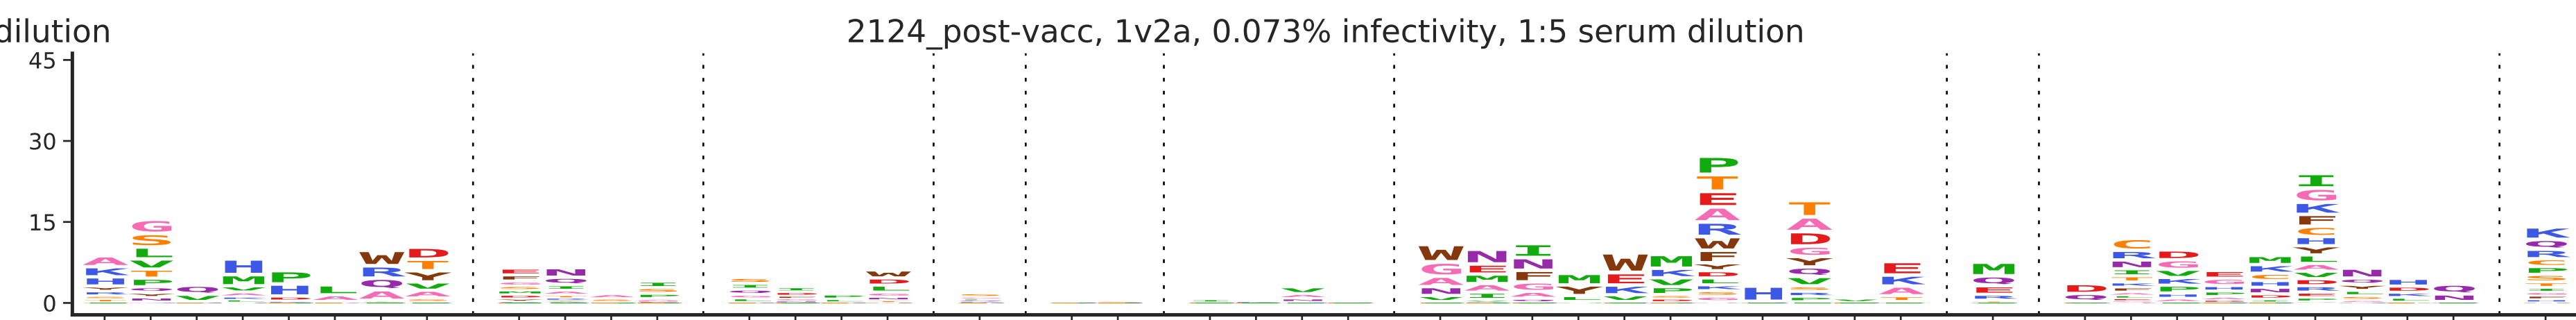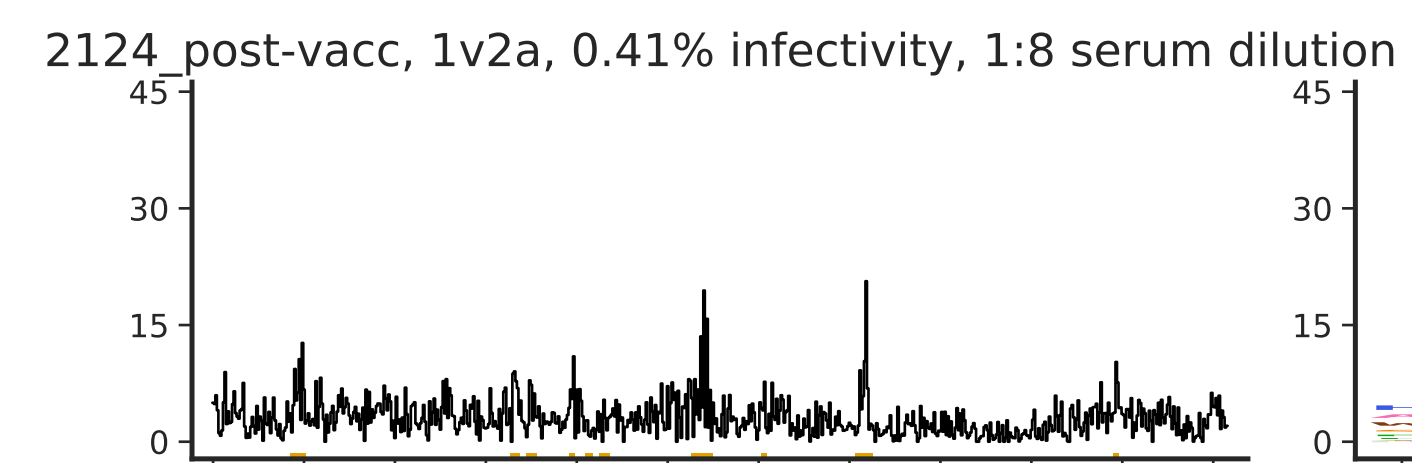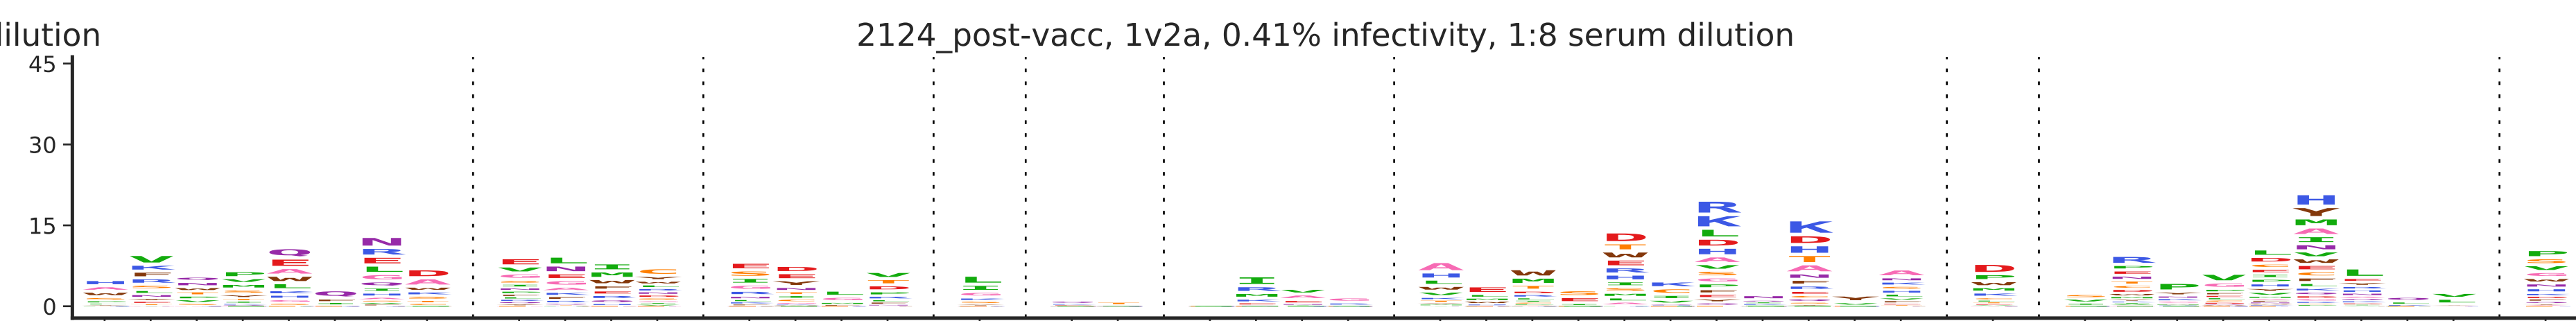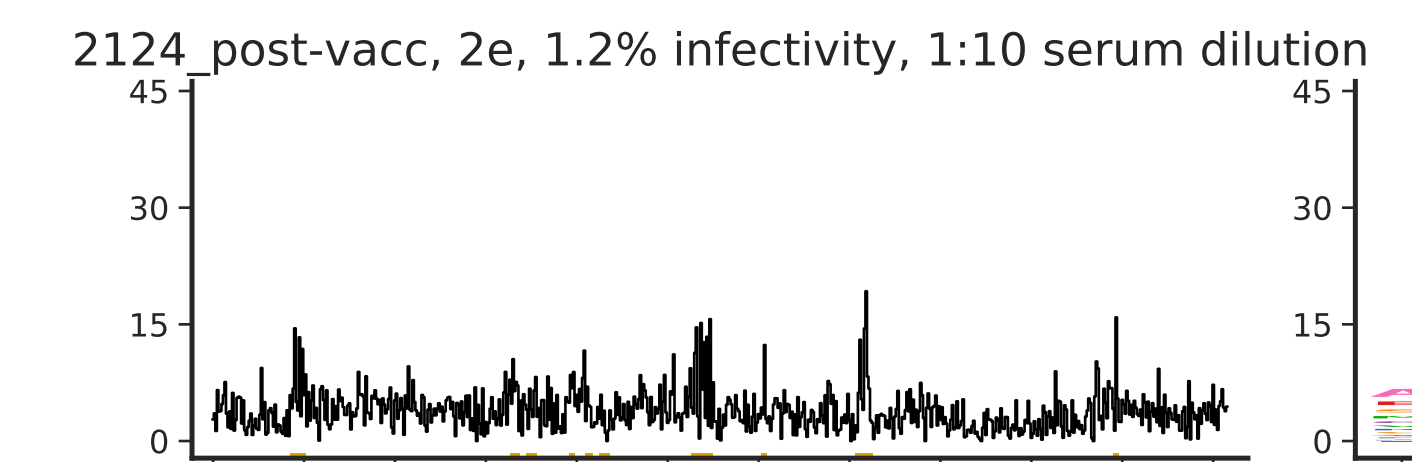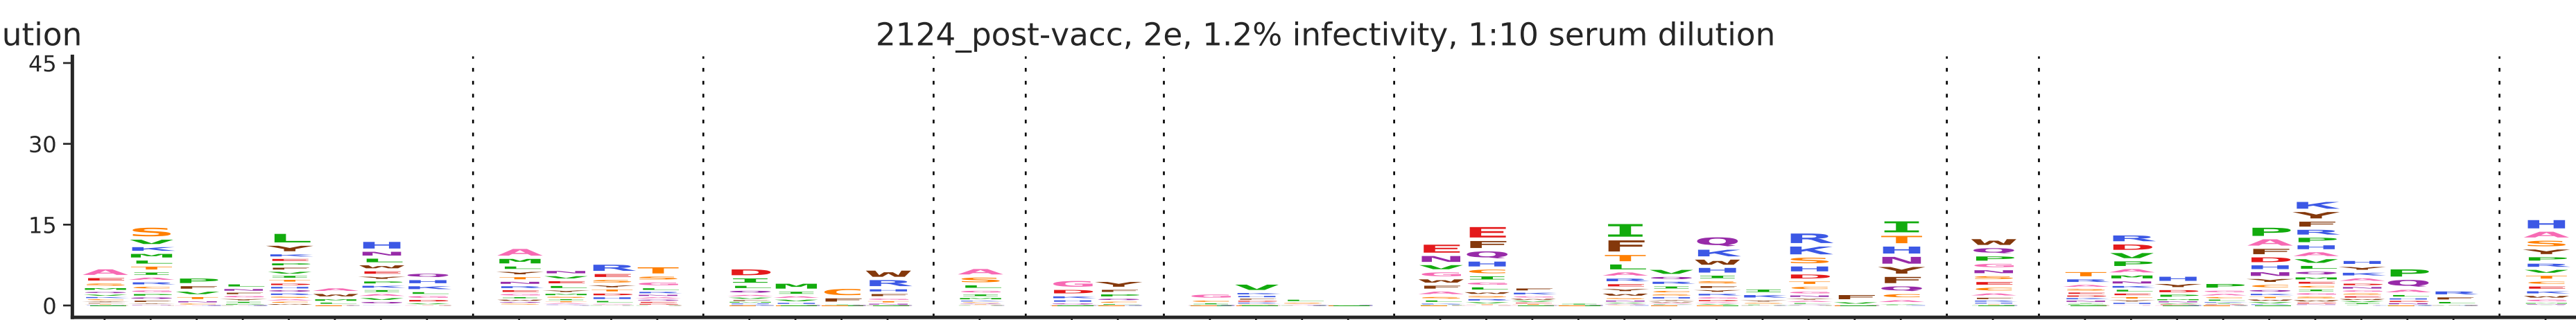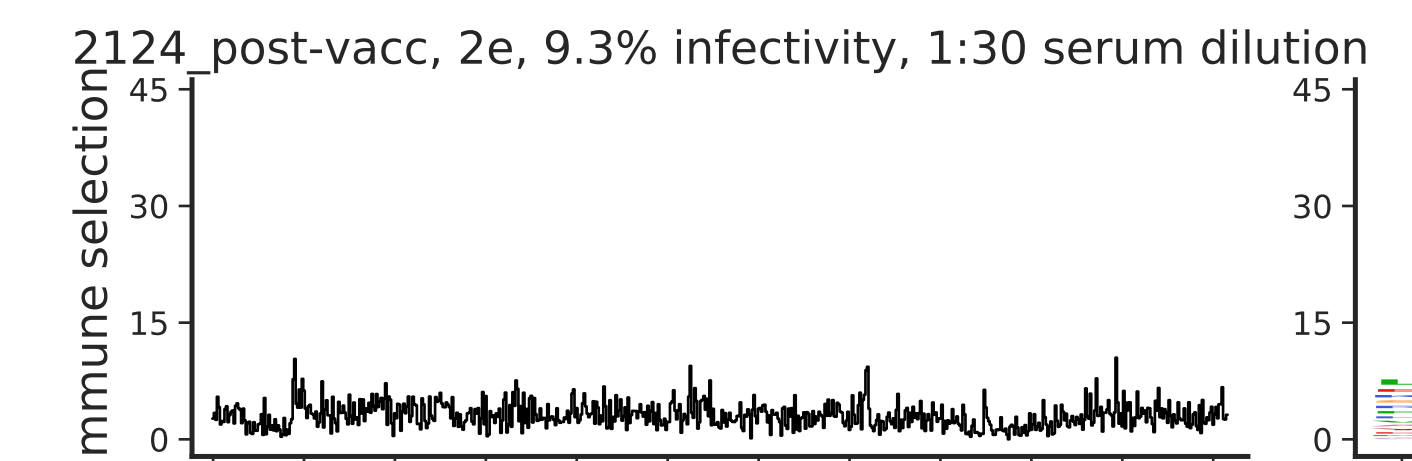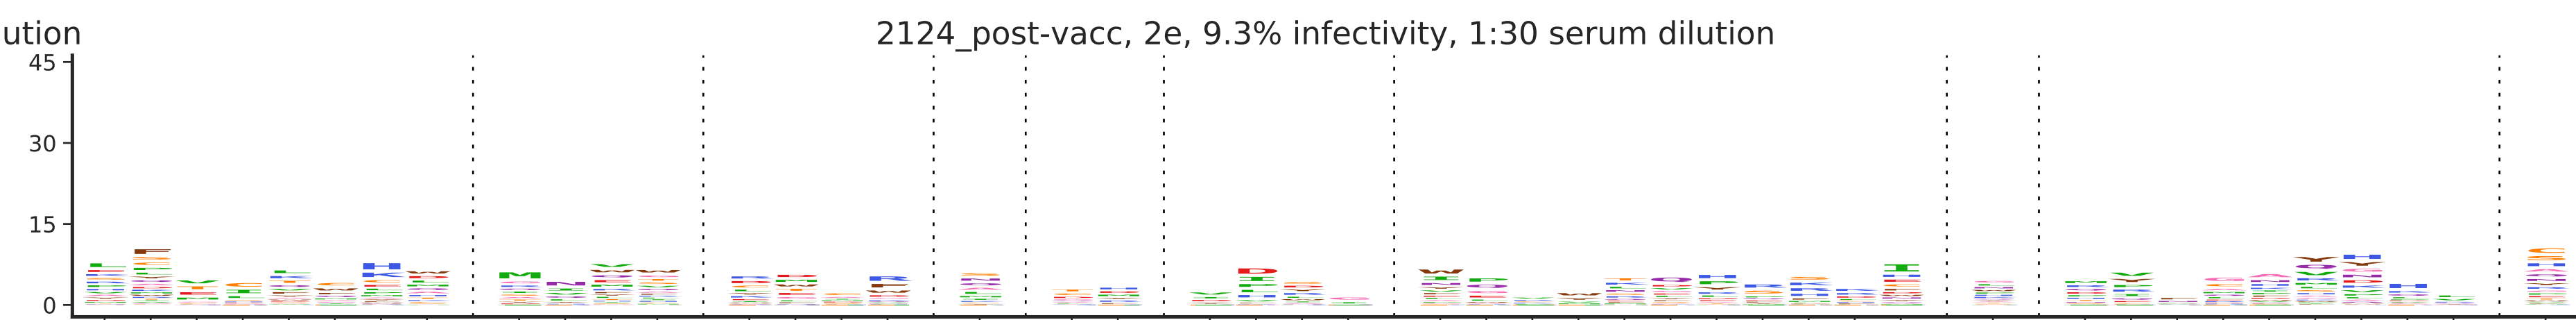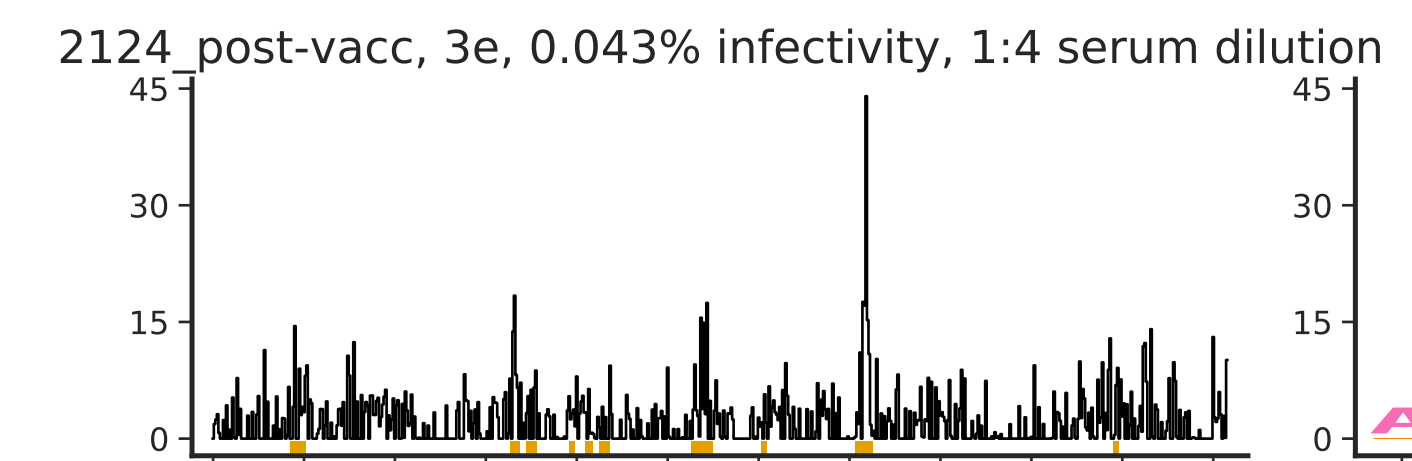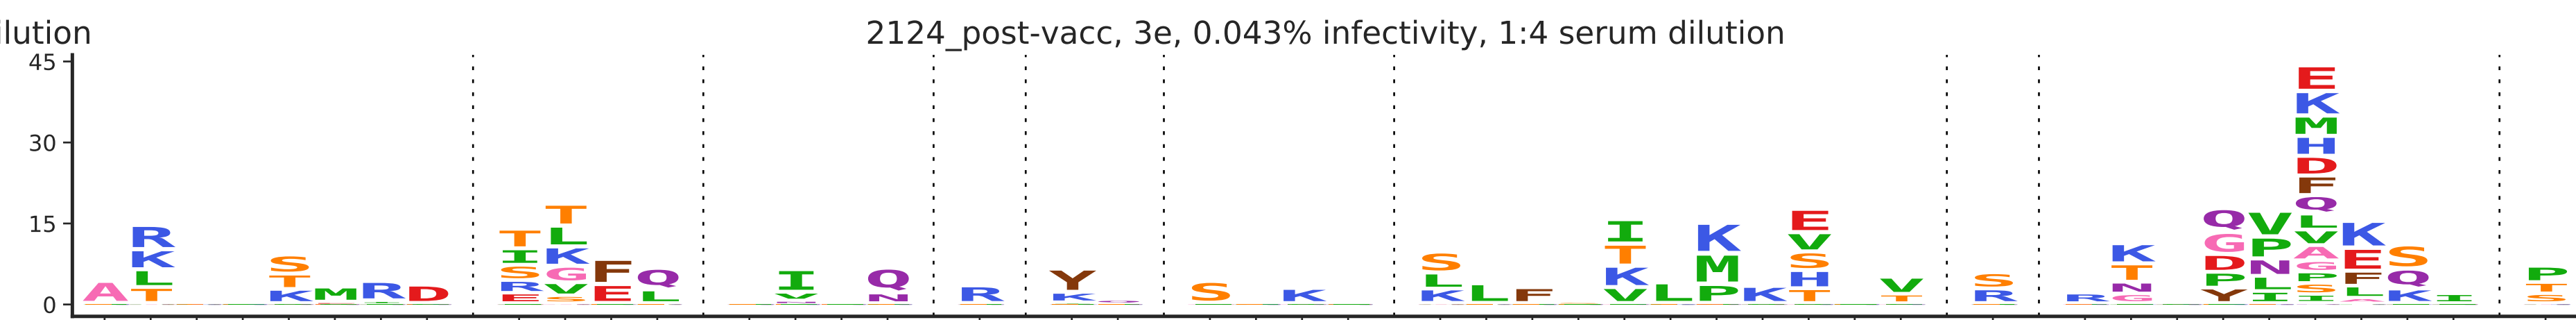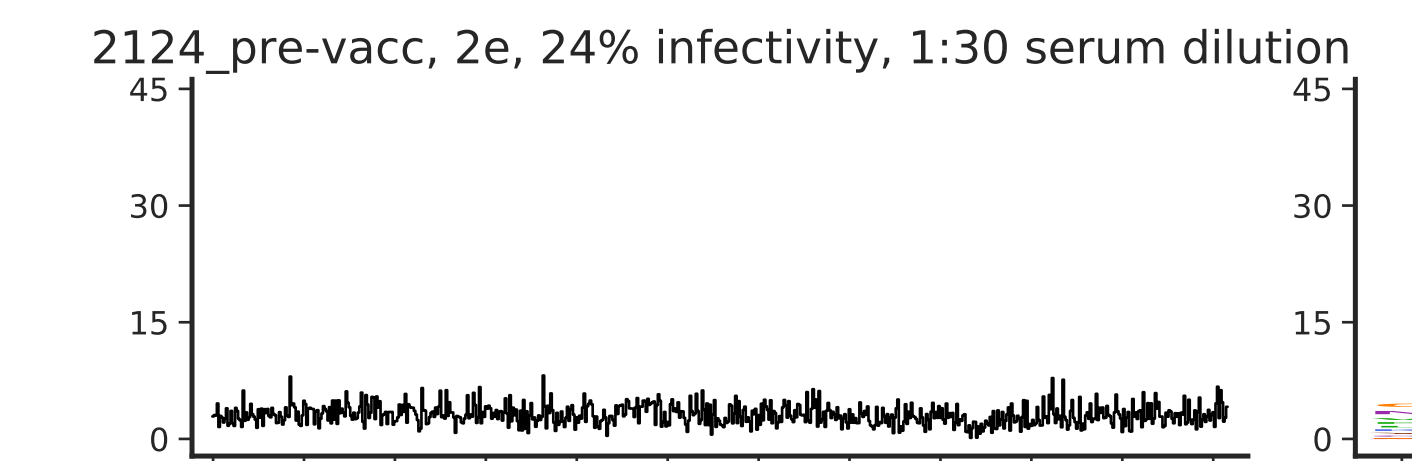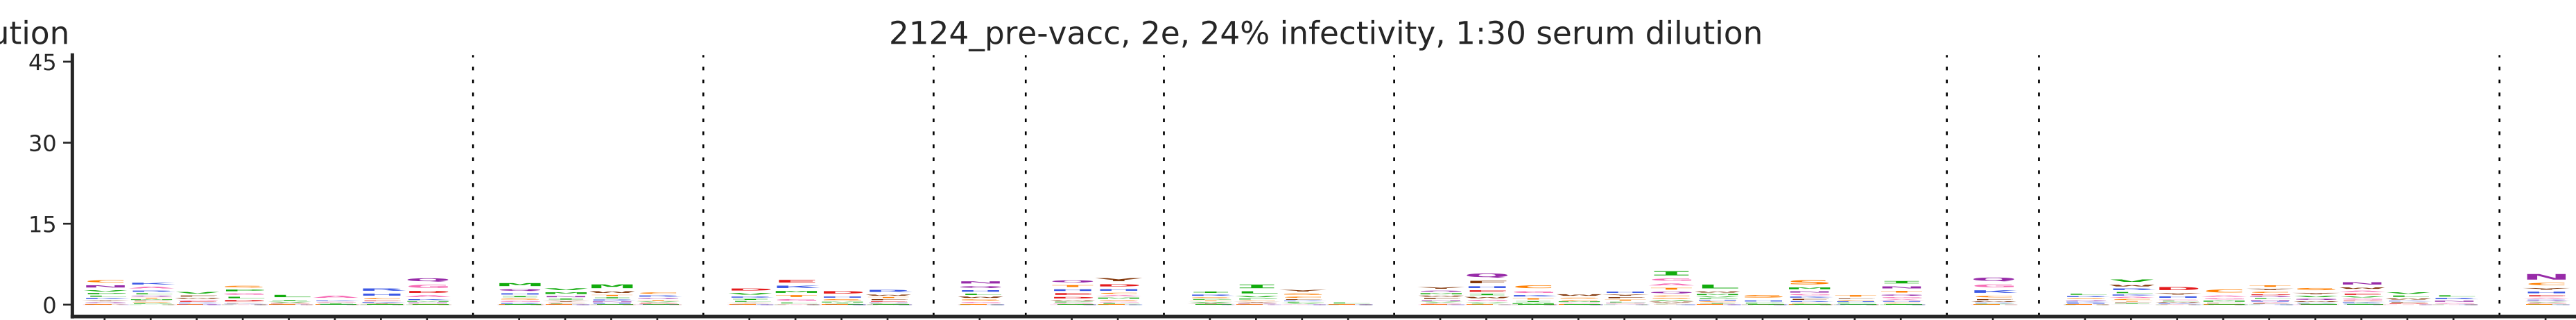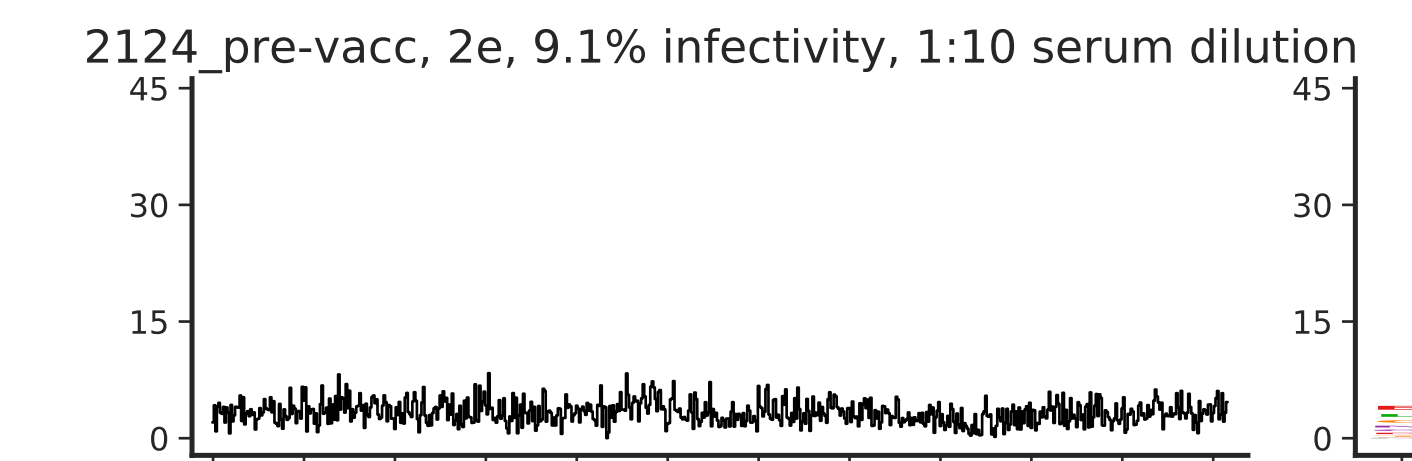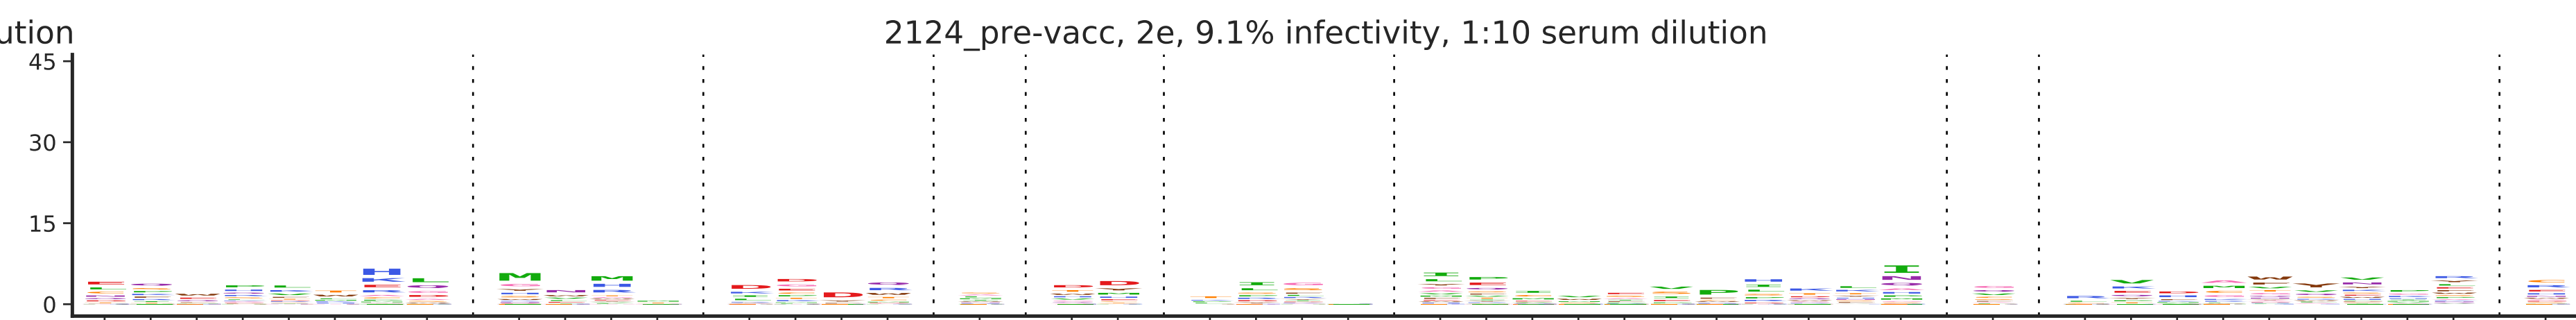

site

Supplement: supp [file elife-64281-supp-v1.zip]

| differential selection = 2

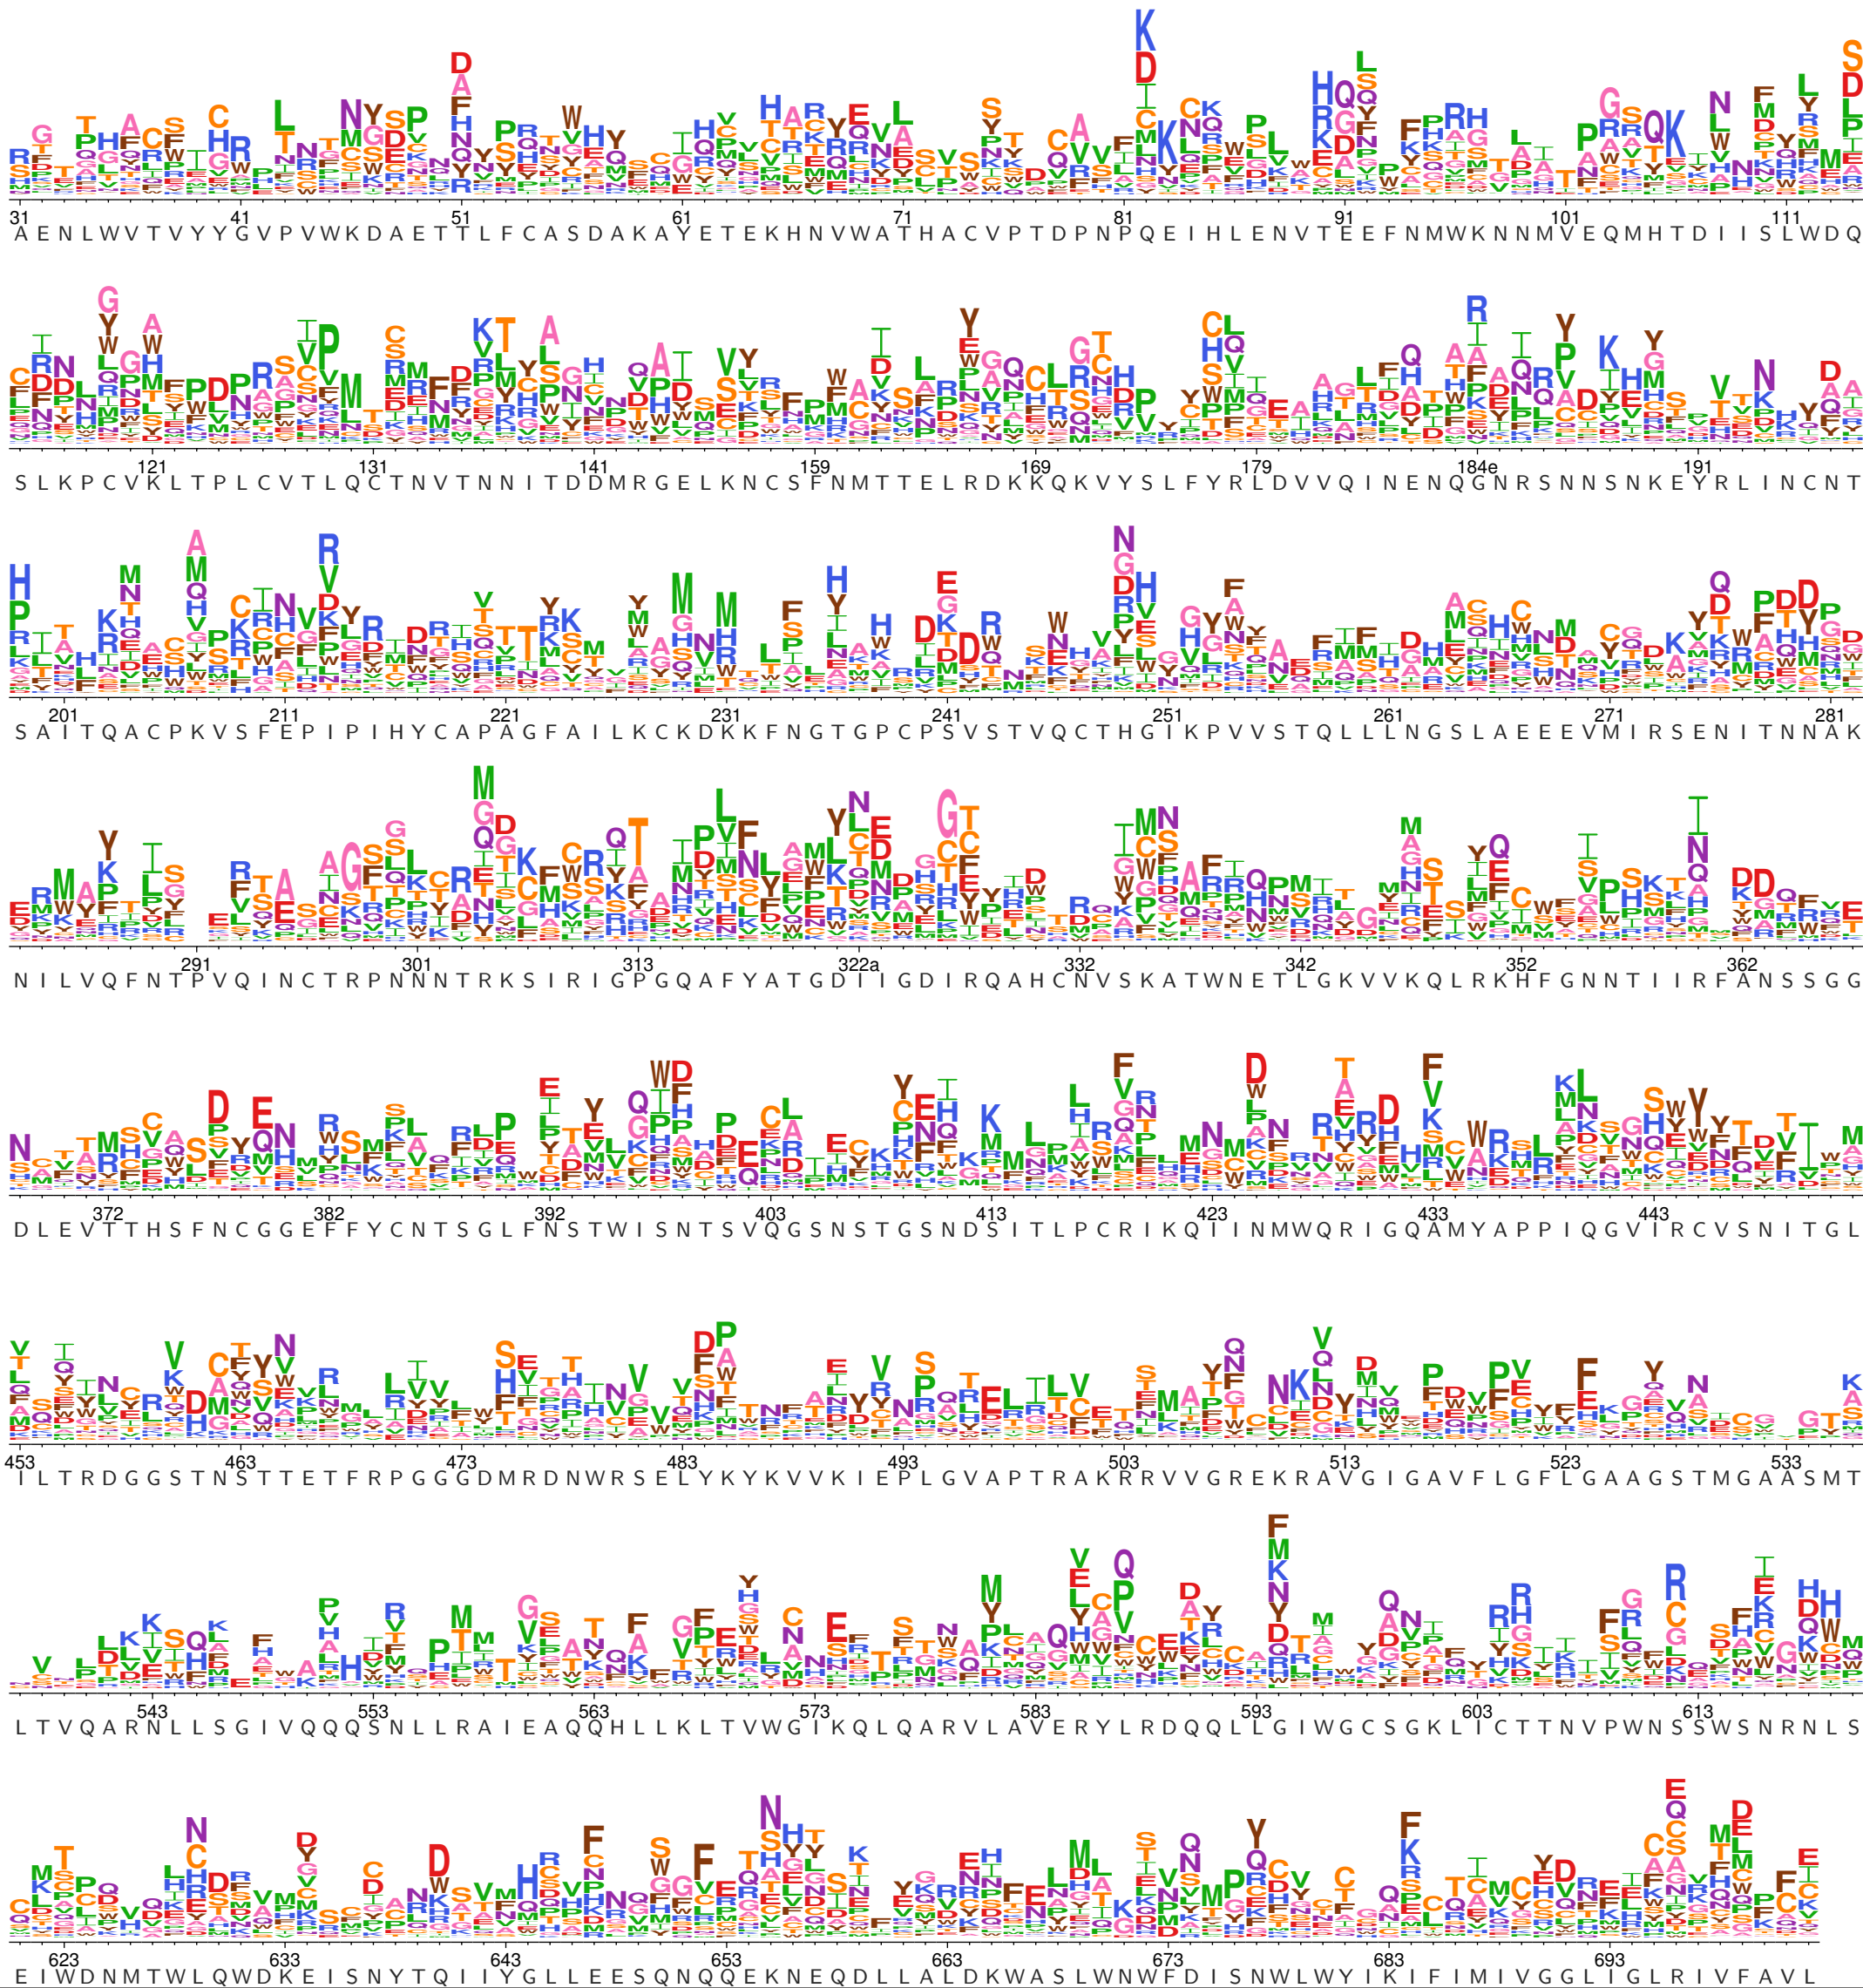

Supplement: supp [file elife-64281-supp-v1.zip]

ldifferential selection = 3

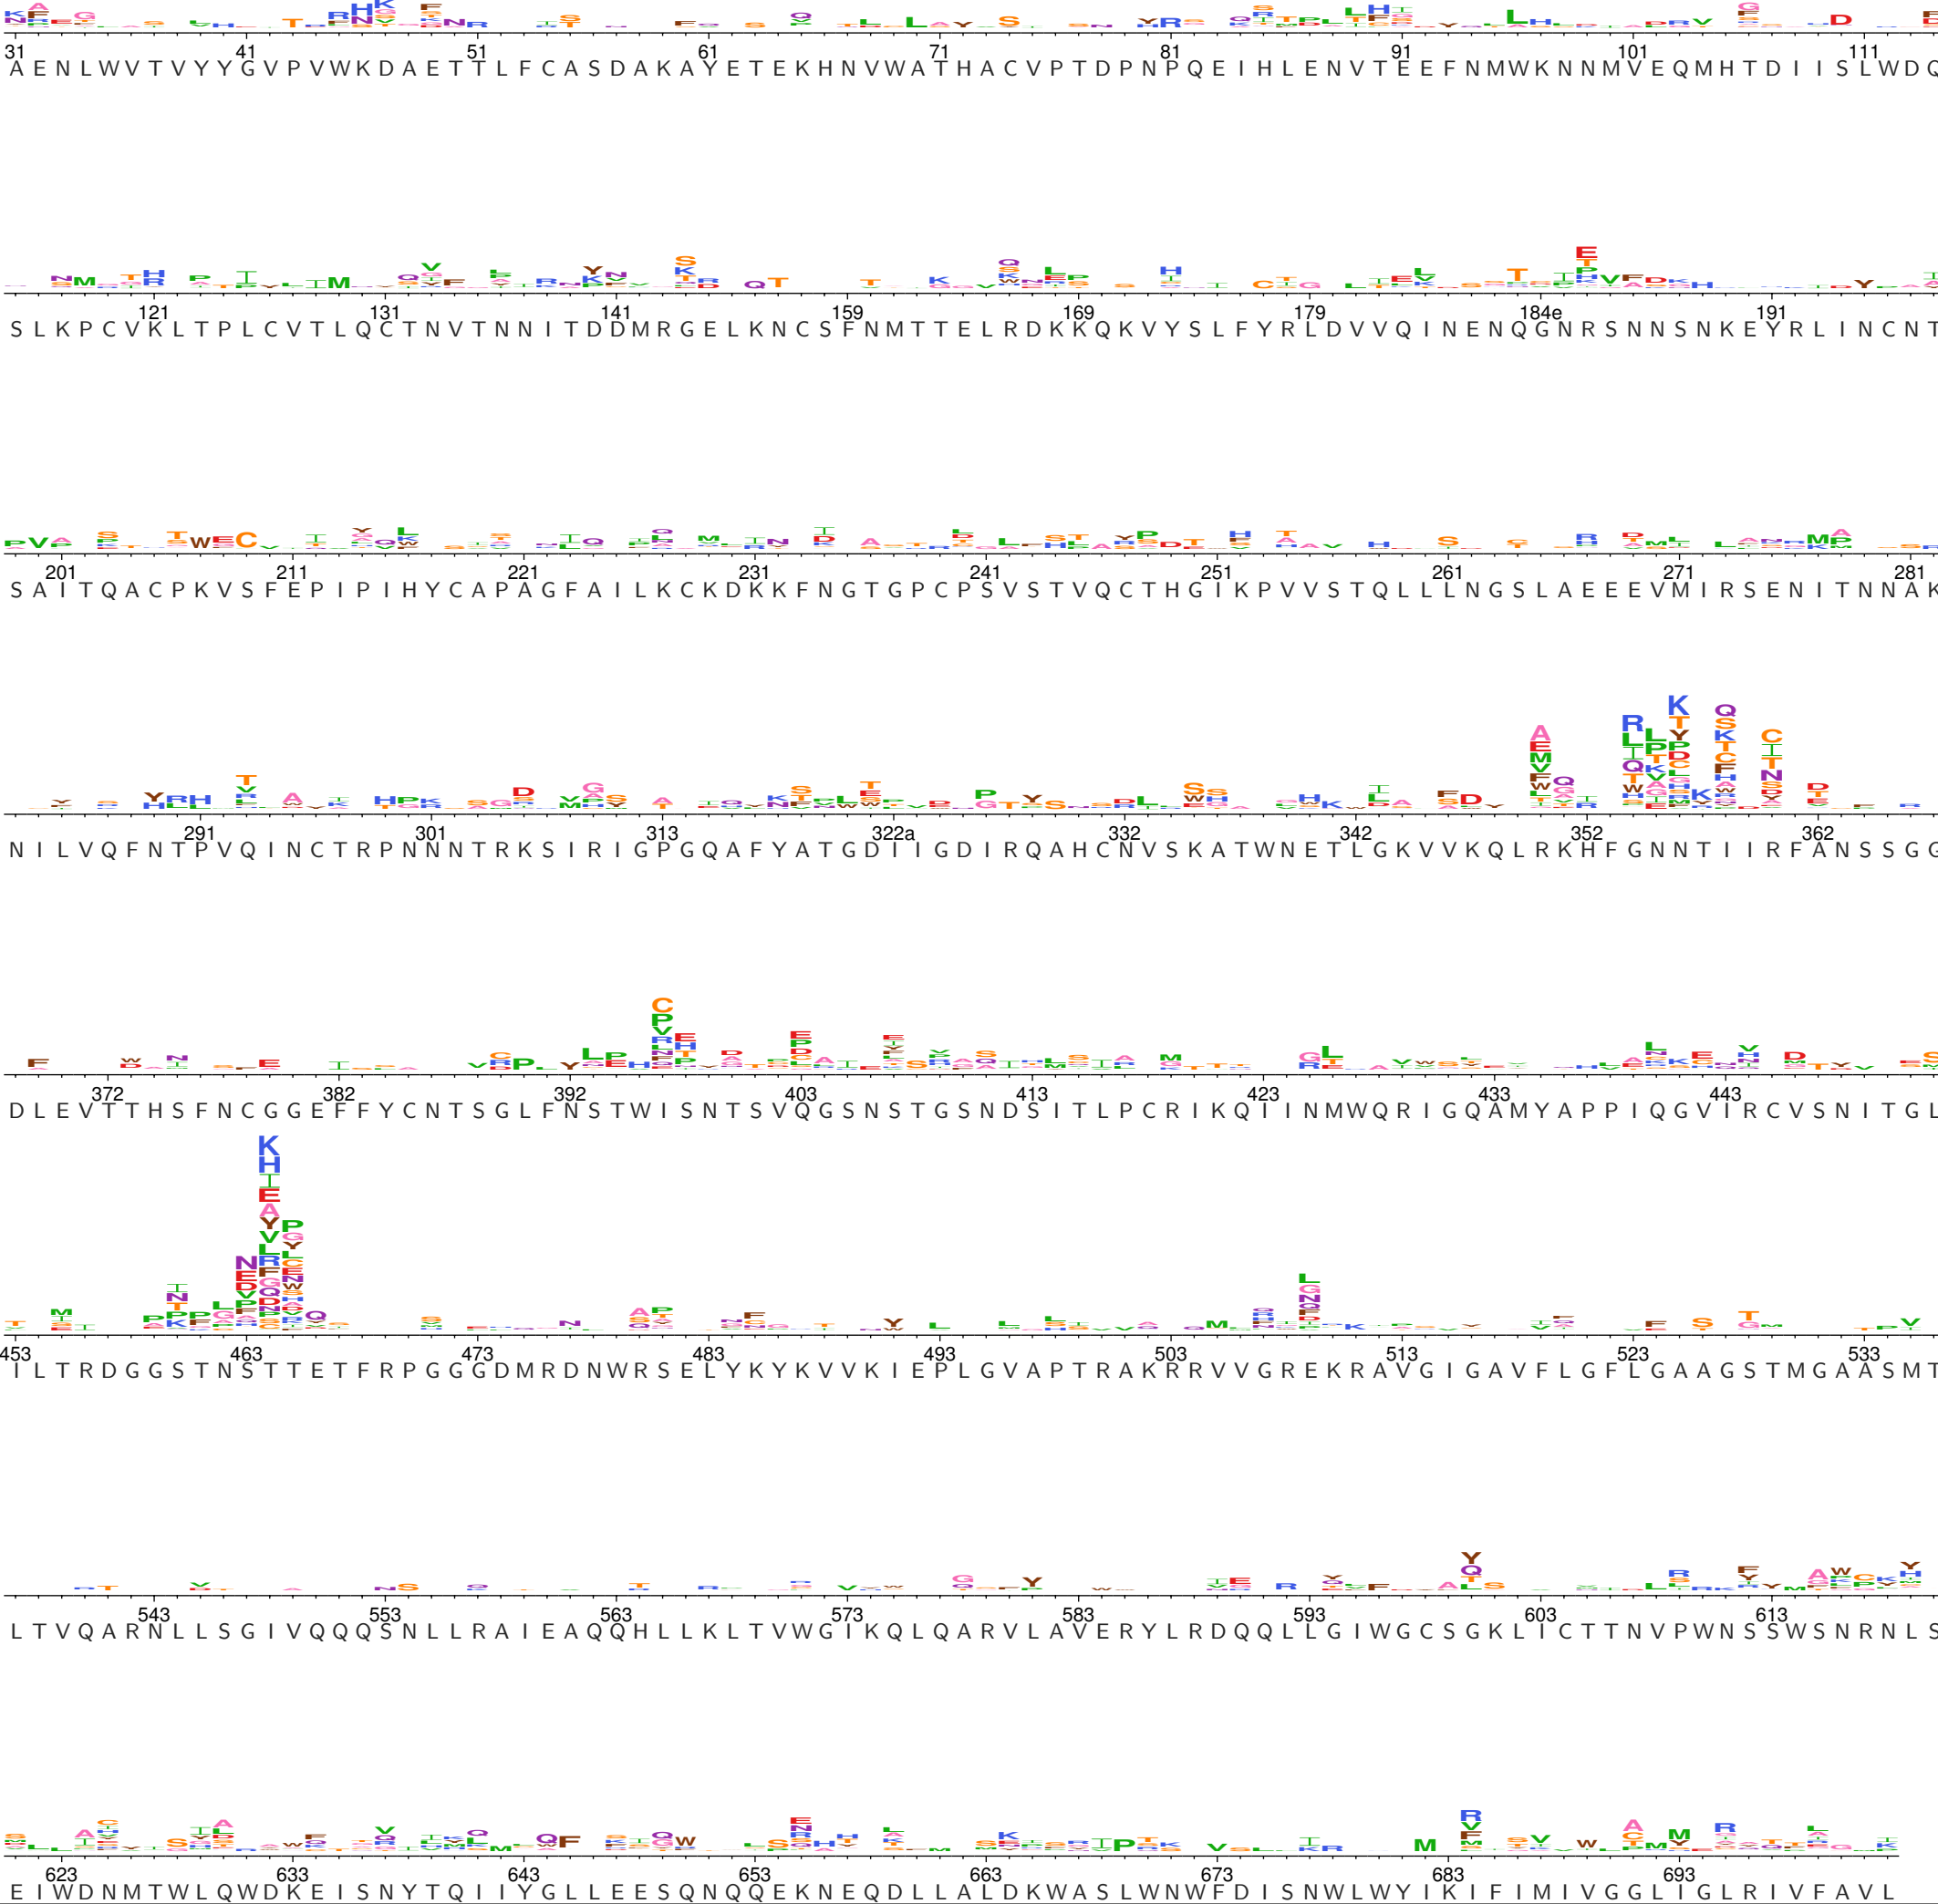

Supplement: supp [file elife-64281-supp-v1.zip]

|differential selection = 2

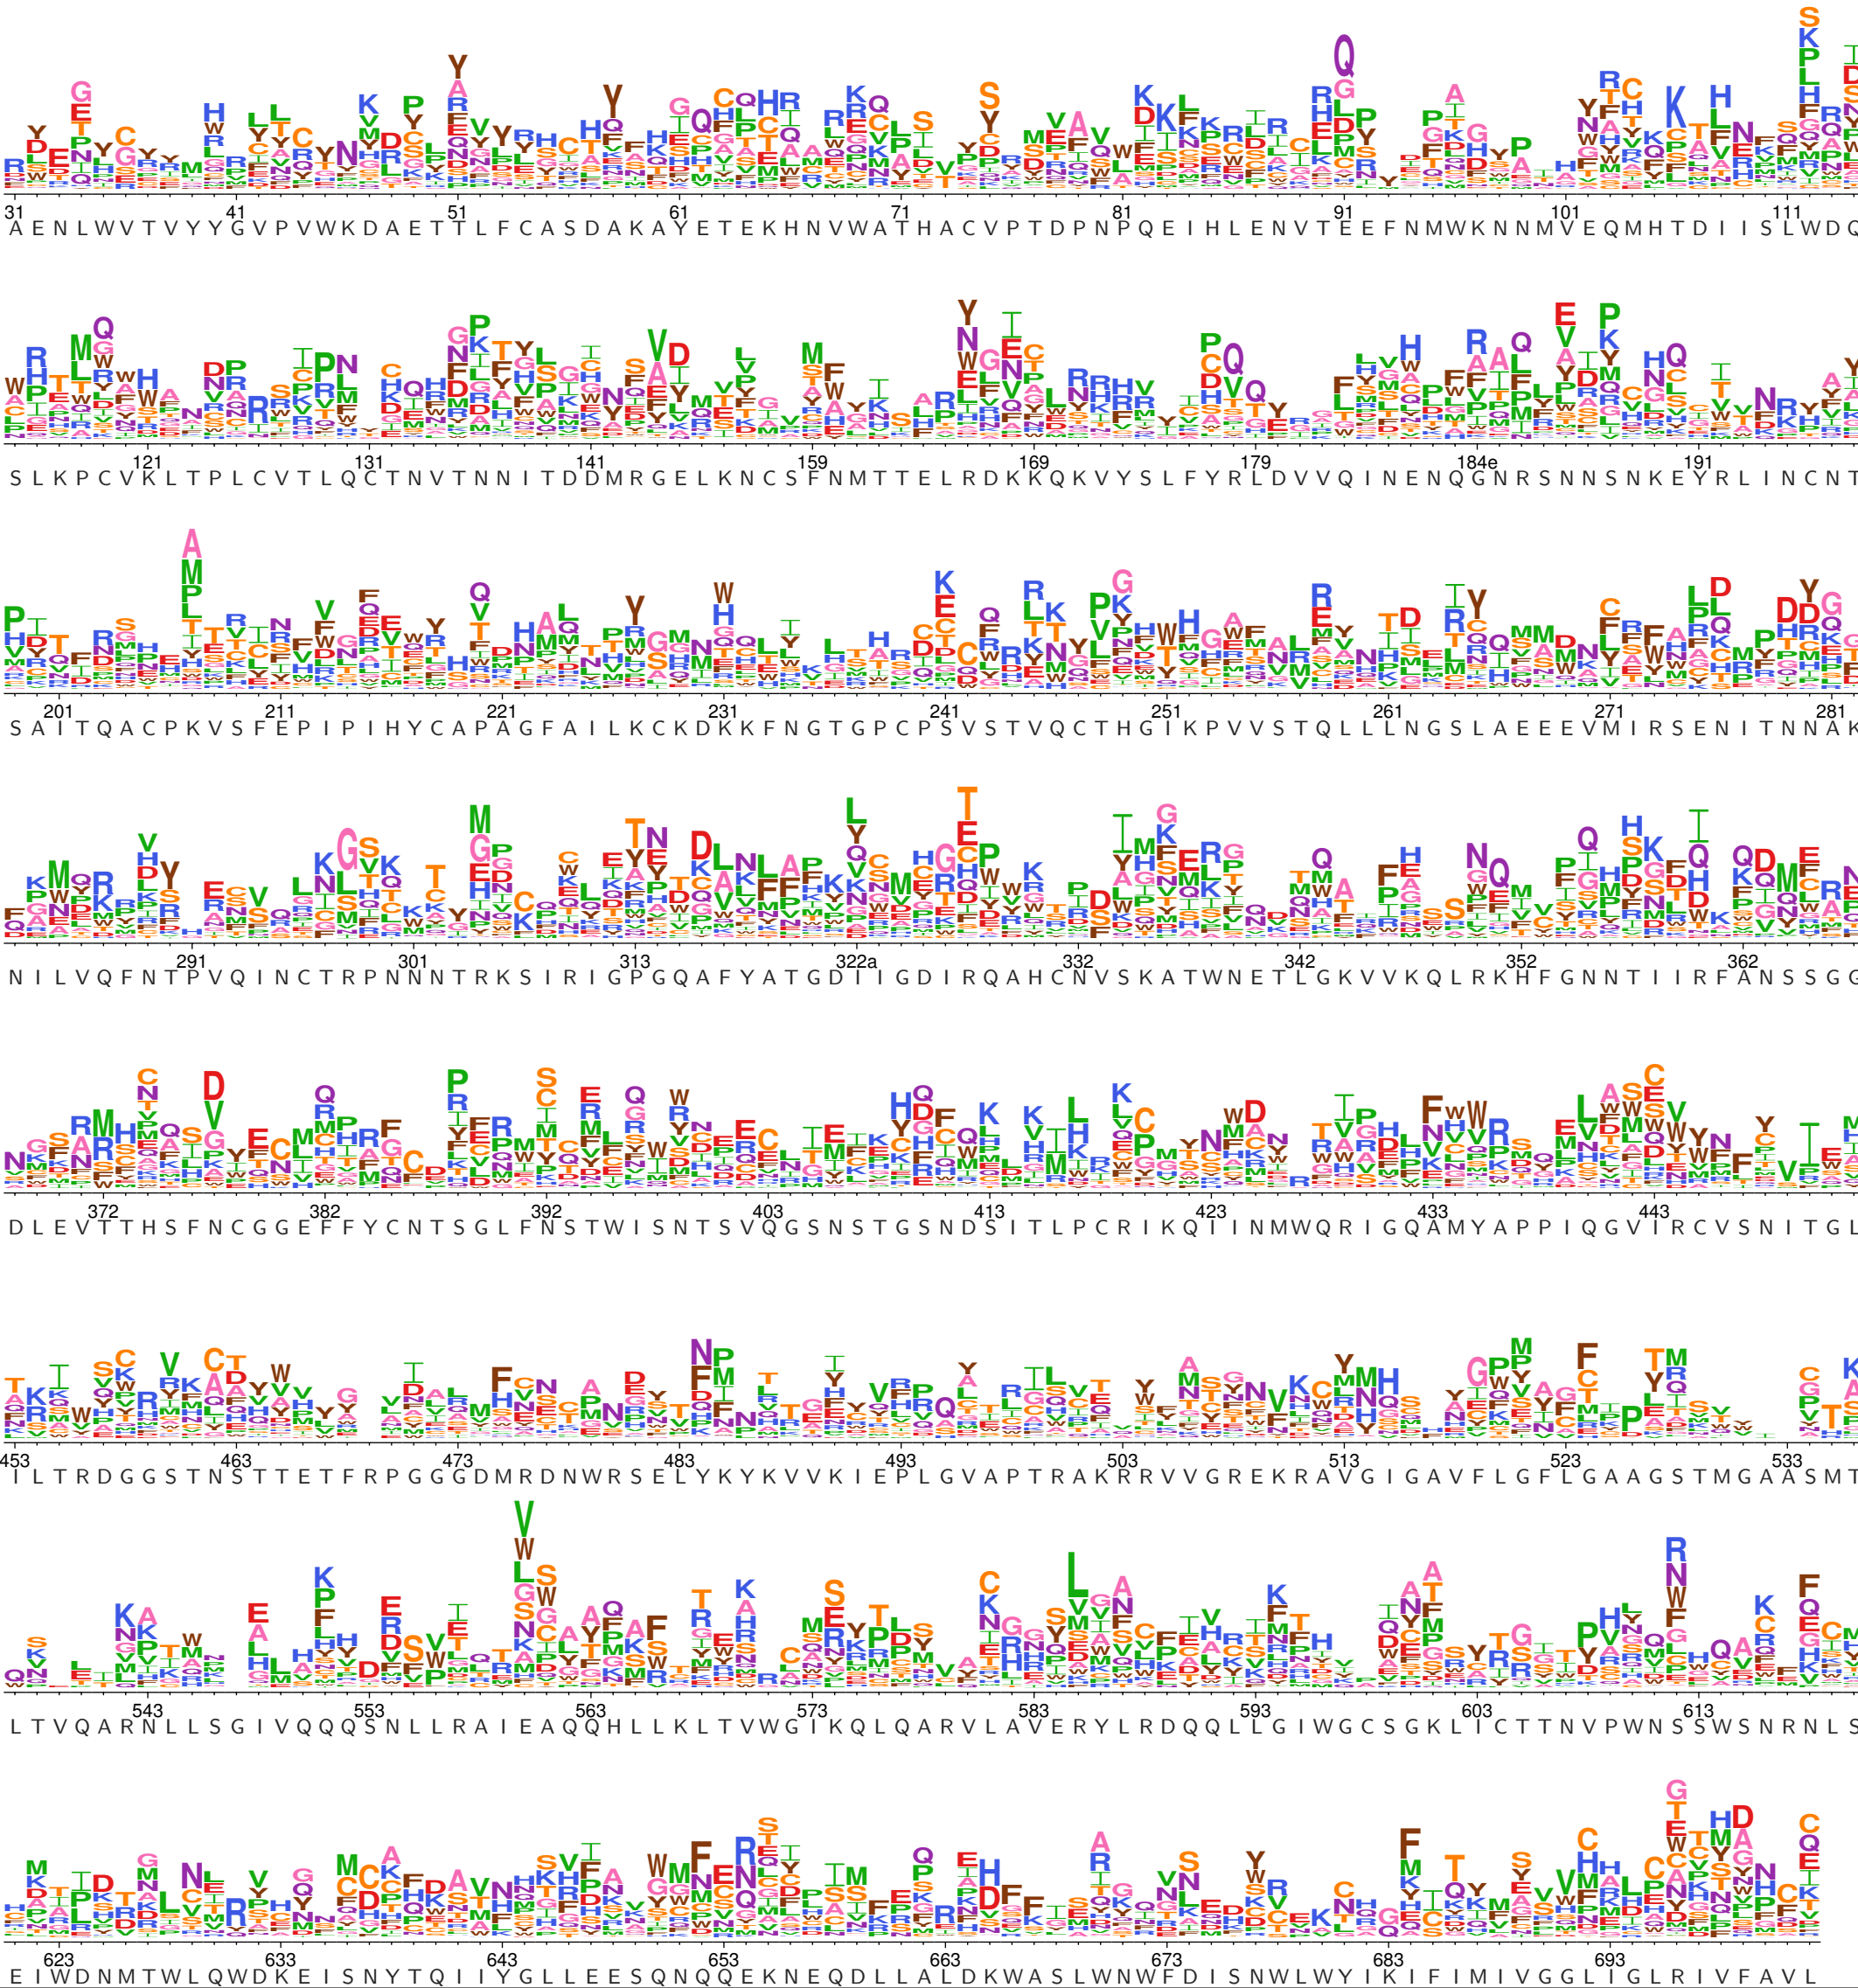

Supplement: supp [file elife-64281-supp-v1.zip]
